# Supplementary material
Source: publisher figshare collection journal article supplement (https://gsajournals.figshare.com/articles/dataset/_/10321538)

# Results from the extended TRJ panel (Stella + Famoso)

Tony Greenberg

March 4, 2019

```
R version 3.5.2 (2018-12-20)
Platform: x86_64-pc-linux-gnu (64-bit)
Running under: Arch Linux
```

```
Matrix products: default
BLAS/LAPACK: /opt/intel/compilers_and_libraries_2019.1.144/linux/mkl/lib/intel64_lin/libmkl_gf_lp64.so
```

```
locale:
```

```
[1] LC_CTYPE=en_US.UTF-8      LC_NUMERIC=C              LC_TIME=en_US.UTF-8
[4] LC_COLLATE=en_US.UTF-8    LC_MONETARY=en_US.UTF-8   LC_MESSAGES=en_US.UTF-8
[7] LC_PAPER=en_US.UTF-8      LC_NAME=C                 LC_ADDRESS=C
[10] LC_TELEPHONE=C           LC_MEASUREMENT=en_US.UTF-8 LC_IDENTIFICATION=C
```

```
attached base packages:
```

```
[1] compiler stats graphics grDevices utils datasets methods base
```

```
other attached packages:
```

```
[1] showtext_0.6 showtextdb_2.0 sysfonts_0.8 gridExtra_2.3 ggplot2_3.1.0
```

```
loaded via a namespace (and not attached):
```

```
[1] Rcpp_1.0.0      crayon_1.3.4    withr_2.1.2     grid_3.5.2      plyr_1.8.4
[6] gtable_0.2.0    scales_1.0.0    pillar_1.3.1    rlang_0.3.1     lazyeval_0.2.1
[11] tools_3.5.2     munsell_0.5.0   pkgconfig_2.0.2 colorspace_1.4-0 tibble_2.0.1
```

In this document I summarize the results of modeling the combined data from Famoso *et al.* and Stella. I start with accession mean generation.

## 1 Accession means

Accession means were derived using the following hierarchical model.

$$\begin{aligned}
\mathbf{y}_{i\cdot} &\sim N_d(\boldsymbol{\mu}_{j[i]\cdot}^{acc}; \boldsymbol{\Sigma}_e) \\
\boldsymbol{\mu}_{j\cdot}^{acc} &\sim N_d(\boldsymbol{\mu} + \mathbf{x}_i \mathbf{B}^{yr} + \mathbf{u}_j \boldsymbol{\Gamma}; \boldsymbol{\Sigma}_s) \\
\boldsymbol{\gamma}_{j\cdot} &\sim t_{\nu_g, d}(\mathbf{0}_d; \boldsymbol{\Sigma}_a) \\
\boldsymbol{\Sigma}_e^{-1} &\sim W_{d, \nu_0} \left( \left[ \sum_i (\mathbf{y}_{i\cdot} - \boldsymbol{\mu}_{j[i]\cdot}^{acc}) (\mathbf{y}_{i\cdot} - \boldsymbol{\mu}_{j[i]\cdot}^{acc})^T \right]^{-1} \right) \\
\boldsymbol{\Sigma}_s^{-1} &\sim W_{d, \nu_0} \left( \left[ \sum_j (\boldsymbol{\mu}_{j\cdot}^{acc} - \boldsymbol{\mu} - \mathbf{x}_i \mathbf{B}^{yr} - \mathbf{u}_j \boldsymbol{\Gamma}) (\boldsymbol{\mu}_{j\cdot}^{acc} - \boldsymbol{\mu} - \mathbf{x}_i \mathbf{B}^{yr} - \mathbf{u}_j \boldsymbol{\Gamma})^T \right]^{-1} \right) \\
\boldsymbol{\Sigma}_a^{-1} &\sim W_{d, \nu_0} \left( [\boldsymbol{\Gamma}^T \boldsymbol{\Gamma}]^{-1} \right),
\end{aligned}$$

where bold lower-case symbols refer to row vectors and bold upper-case symbols are matrices. All vectors are of length  $d$  and all matrices have  $d$  columns, where  $d$  is the number of traits ( $d = 2$  in our case).  $\mathbf{B}^{yr}$  is the matrix of year effects. There are four years, but the 2016 and 2017 are essentially the same experiment. Therefore, I constructed two contrasts with 2016+2017 set as the base (see **dataPrep** documents). The degrees of freedom parameter  $\nu_g$  was set to 1000, leading to essentially a Gaussian model for the genetic component. Notation of the  $i\cdot$  type refers to rows in matrices. Subscripts of the  $j[i]$  type refer to a row  $j$  in a upper level (in the model hierarchy) that corresponds to a replicate row  $i$ .

I define functions that calculate summaries of Markov chains.

```

> pmode <- cmpfun(function(vec){
+   dst <- density(vec, adjust = 2)
+   mxi <- which(dst$y == max(dst$y))
+   if(length(mxi) > 1){
+     warning("More than one mode in call to pmode(); picking randomly")
+     mxi <- sample(mxi, 1)
+   }
+   dst$x[mxi]
+ })
> HPDint <- cmpfun(function(vec, prob = 0.95){
+   nsamp <- length(vec)
+   if (nsamp <= 2) stop("vector must have length > 2")
+
+   vals <- sort(vec)
+   gap <- max(1, min(nsamp - 1, round(nsamp * prob)))
+   init <- 1:(nsamp - gap)
+   mInd <- which.min(vals[init + gap] - vals[init])
+   res <- c(vals[mInd], vals[mInd + gap])
+   names(res) <- c("lower", "upper")
+   return(res)
+ })

```

Next, I write a function that is similar to `quantile()`, but outputs the mode, lower and upper limits of the 95% and 50% HPD. The `outr` parameter is the probability for the outer margins, default is 95%.

```
> quantileLike <- cmpfun(function(vec, outr = 0.95){
+   if(outr <= 0.5) stop("Outer margin has to be >= 50%")
+   md     <- pmode(vec)
+   hpd95 <- HPDint(vec, outr)
+   hpd50 <- HPDint(vec, 0.5)
+   res    <- c(hpd95[1], hpd50[1], md, hpd50[2], hpd95[2])
+
+   outNm <- paste(c("lower", "upper"), outr*100, sep = "")
+   names(res) <- c(outNm[1], "lower50", "mode", "upper50", outNm[2])
+   return(res)
+ })
```

Write a function that will read in specified chains.

```
> addSamp <- cmpfun(function(i, vrNam, ncl){
+   inFlNam <- paste("../chains/", vrNam, "_3_", i, ".gbin", sep = "")
+   chn <- rbind(chn,
+     matrix(.C("GSLmatLoad",
+       inFlNam, as.integer(chnLen), as.integer(ncl),
+       out = double(chnLen*ncl))$out,
+       nrow = chnLen, byrow = T)
+   )
+   return(NULL)
+ })
```

Define constants.

```
> trtNam <- c("Control", "Treated")
> d      <- length(trtNam)
> nChn   <- 5
> chnLen <- 2000
```

Read year effect chains to check how well the correction worked.

```
> yrNam <- c("2016/2017", "2008", "2010")
> Nyr   <- length(yrNam)
> yrDim <- d*Nyr
> chn   <- NULL
> trash <- sapply(1:nChn, addSamp, "YR", yrDim)
> yrMn   <- as.data.frame(t(apply(chn, 2, quantileLike)))
> yrMn$trait <- rep(trtNam, times = Nyr)
```

Plot the results.

```
> pdfFlNam <- "yearEffectADD.pdf"
> showtext_auto()
> ggplot(data=yrMn, aes(x=1:nrow(yrMn),y=mode)) +
+   geom_segment(aes(x=1:nrow(yrMn), y=lower95, xend=1:nrow(yrMn), yend=upper95),
+     color="grey80", size=0.75) +
+   geom_segment(aes(x=1:nrow(yrMn), y=lower50, xend=1:nrow(yrMn), yend=upper50),
+     color="grey50", size=1) +
+   geom_point() +
+   facet_wrap(~trait, scales="free_y", nrow=2) +
+   theme_classic(base_size=18, base_family="myriad") +
+   theme(strip.background=element_rect(fill="grey95", linetype="blank")) +
+   #theme(axis.title.x=element_blank(), axis.text.x=element_blank(),
+   #      axis.ticks.x=element_blank()) +
+   scale_x_continuous(name="year", breaks=c(1.5, 3.5, 5.5), labels=yrNam) +
+   labs(y="root length")
> ggsave(pdfFlNam, width=8, height=10, units="in", device="pdf", useDingbats=F)
> cat("\\\\includegraphics{" , pdfFlNam, "}"\\n\\n", sep="")
```

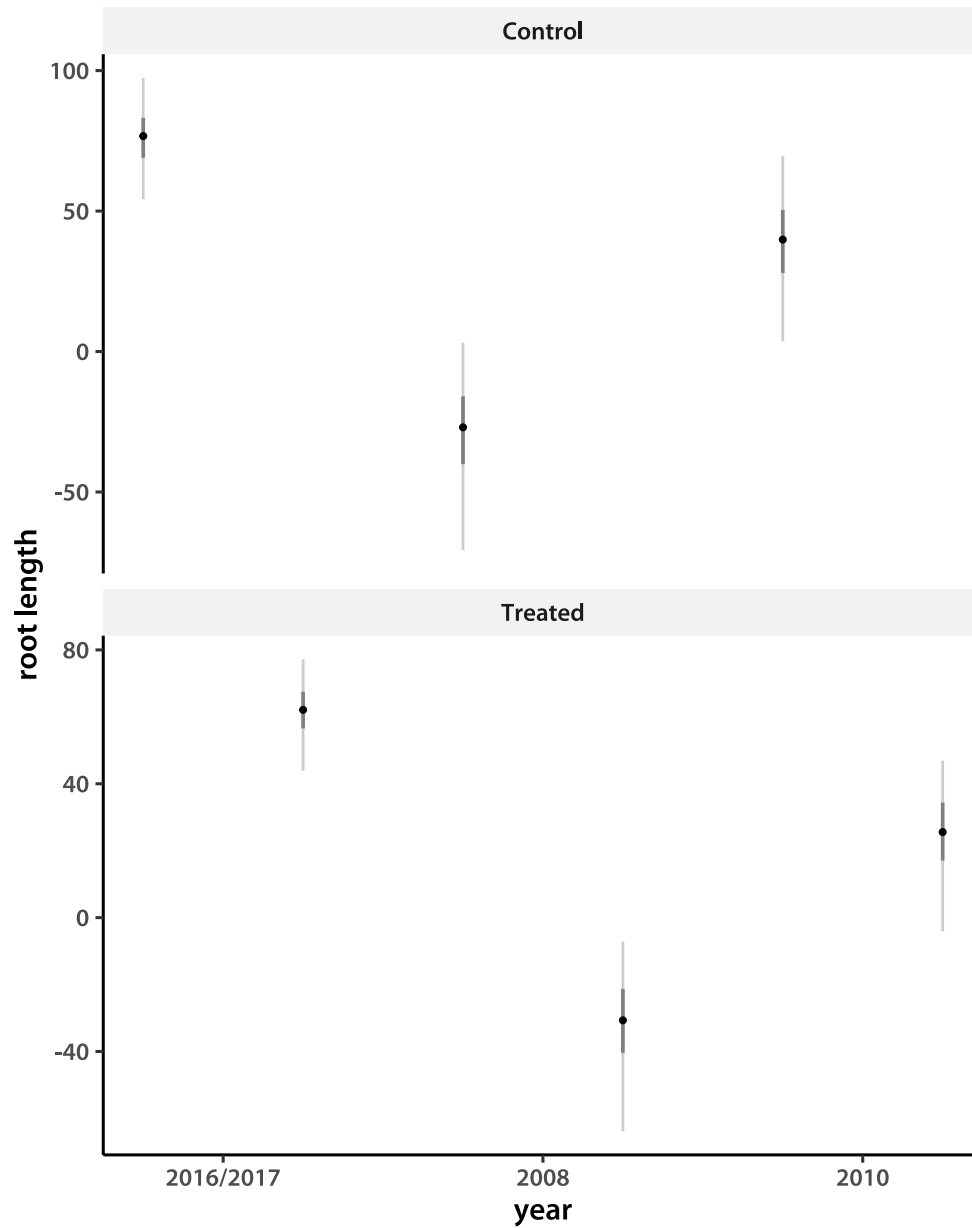

The year effects are in line with expectation from looking at raw data plots.

I move on to read accession mean chains. The accession means corrected for the year effect are in files marked LY.

```
> accNam <- matrix(scan("../accID.tsv", what = character()), ncol = 2, byrow = T)[,1]
> Nacc    <- length(accNam)
> accDim  <- d*Nacc
> nChn    <- 5
> chnLen  <- 2000
> chn     <- NULL
```

```
> trash <- sapply(1:nChn, addSamp, "LY", accDim)
> accMn      <- as.data.frame(t(apply(chn, 2, quantileLike)))
> accMn$trait <- rep(trtNam, times = Nacc)
> accMnS     <- accMn[order(accMn[,6], accMn[,3]),]
>
```

I plot sorted accession means.

```
> pdfFlNam <- "lineMeansADD.pdf"
> showtext_auto()
> ggplot(data=accMnS, aes(x=1:nrow(accMnS), y=mode)) +
+   geom_segment(aes(x=1:nrow(accMnS), y=lower95, xend=1:nrow(accMnS), yend=upper95),
+     color="grey80", size=0.75) +
+   geom_segment(aes(x=1:nrow(accMnS), y=lower50, xend=1:nrow(accMnS), yend=upper50),
+     color="grey50", size=1) +
+   geom_point() +
+   facet_wrap(~trait, scales="free", nrow=2) +
+   theme_classic(base_size=18, base_family="myriad") +
+   theme(axis.title.x=element_blank(), axis.text.x=element_blank(),
+     strip.background=element_rect(fill="grey95", linetype="blank"),
+     axis.ticks.x=element_blank()) +
+   labs(y="root length")
> ggsave(pdfFlNam, width=8, height=10, units="in", device="pdf", useDingbats=F)
> cat("\\\\includegraphics{" , pdfFlNam, "}"\\n\\n", sep="")
```

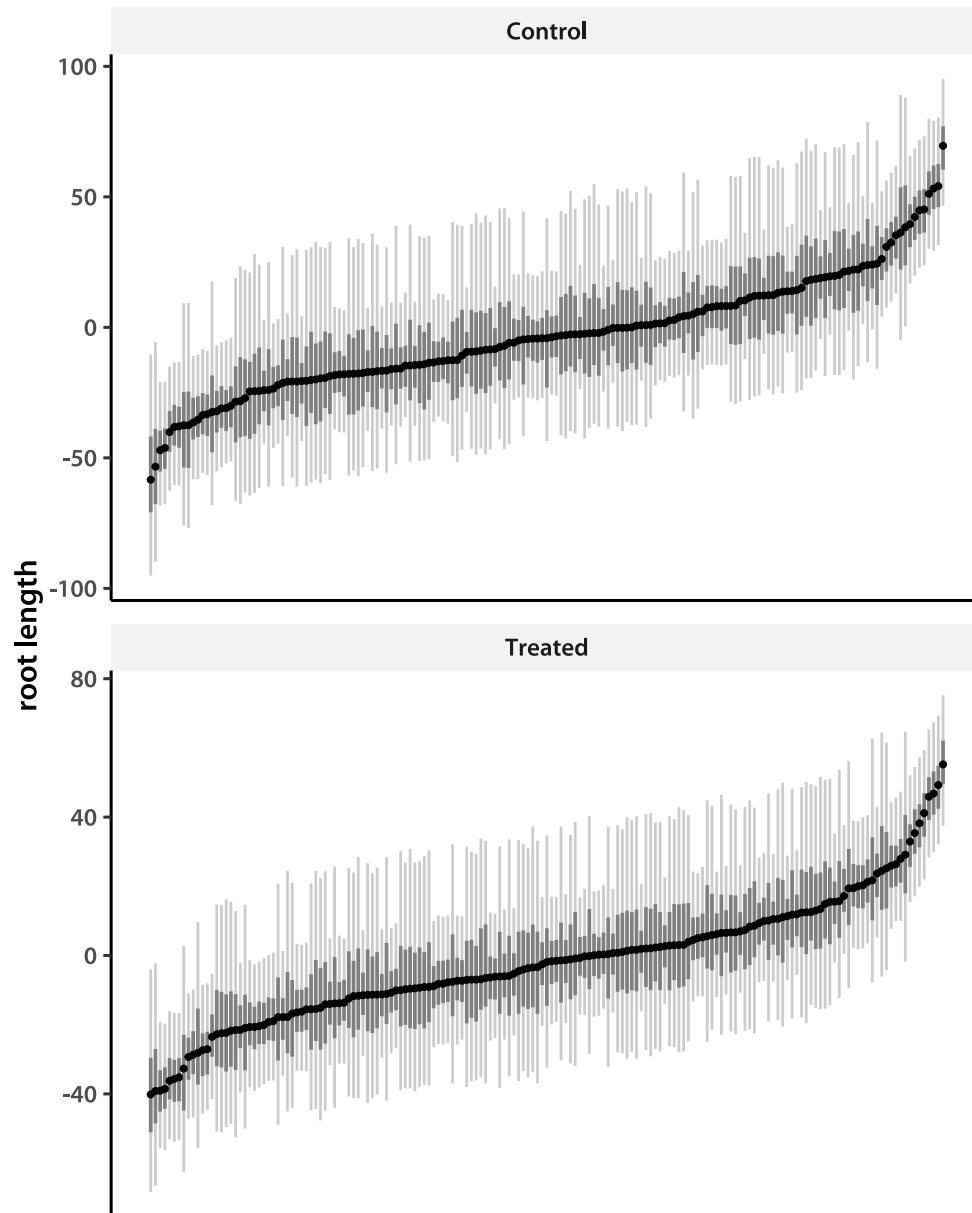

I write a function to check genetic correlations between the two “traits.”

```
> trtCor <- cmpfun(function(vec){  
+   cor(matrix(vec, ncol=d, byrow=T))[1,2]  
+ })  
> lnCor <- apply(chn, 1, trtCor)  
> round(quantileLike(lnCor), 3)
```

| lower95 | lower50 | mode  | upper50 | upper95 |
|---------|---------|-------|---------|---------|
| 0.803   | 0.858   | 0.886 | 0.906   | 0.945   |

There does not seem to be much interaction between accession ID and treatment (the genetic correlation between treated and control is very high). Next I look at GEBV distributions.

```
> chn      <- NULL
> trash    <- sapply(1:nChn, addSamp, "BV", accDim)
> gebvCHN <- chn
> gebv     <- as.data.frame(t(apply(chn, 2, quantileLike)))
> gebv$trait <- rep(trtNam, times = Nacc)
> gebvS    <- gebv[order(gebv[,6], gebv[,3]),]
```

I plot sorted accession means.

```
> pdfFlNam <- "gebvADD.pdf"
> showtext_auto()
> ggplot(data=gebvS, aes(x=1:nrow(gebvS), y=mode)) +
+   geom_segment(aes(x=1:nrow(gebvS), y=lower95, xend=1:nrow(gebvS), yend=upper95),
+     color="grey80", size=0.75) +
+   geom_segment(aes(x=1:nrow(gebvS), y=lower50, xend=1:nrow(gebvS), yend=upper50),
+     color="grey50", size=1) +
+   geom_point() +
+   facet_wrap(~trait, scales="free", nrow=2) +
+   theme_classic(base_size=18, base_family="myriad") +
+   theme(axis.title.x=element_blank(), axis.text.x=element_blank(),
+     strip.background=element_rect(fill="grey95", linetype="blank"),
+     axis.ticks.x=element_blank()) +
+   labs(y="root length")
> ggsave(pdfFlNam, width=8, height=10, units="in", device="pdf", useDingbats=F)
> cat("\\includegraphics{" , pdfFlNam, "}"\\n\\n", sep="")
```

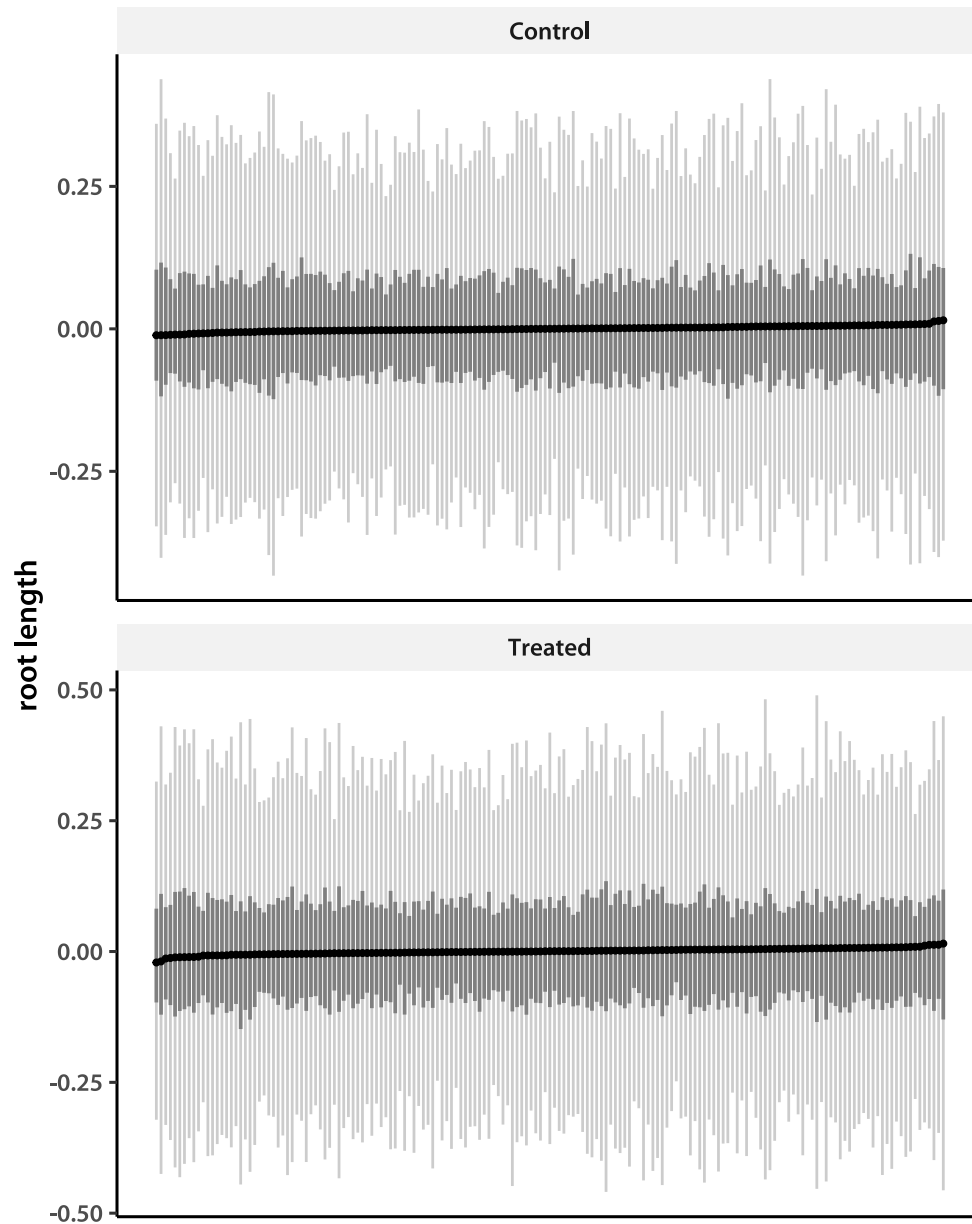

## 2 Heritability

I next estimate heritability, both broad-sense and marker-based narrow sense. Because I am using a Student- $t$  model for marker effects, I cannot use  $\Sigma_a$  directly, but have to calculate the variances from the GEBV estimates. In addition to broad-sense heritability, I am interested in the separate contribution of background effects. I first define the functions I need.

```
> makeVar <- cmpfun(function(vec){  
+   apply(matrix(vec, ncol=d, byrow=T), 2, var)  
+ })
```

```

> get.hsq <- cmpfun(function(vec){
+   vec[1:d]/rowSums(matrix(vec, nrow = d))
+ })
> get.Hsq <- cmpfun(function(vec){
+   (vec[1:d] + vec[(d+1):(2*d)])/rowSums(matrix(vec, nrow = d))
+ })
> get.nad <- cmpfun(function(vec){
+   (vec[(d+1):(2*d)])/rowSums(matrix(vec, nrow = d))
+ })

```

The function `get.hsq` calculates the marker heritability, which is a kind of narrow-sense heritability. It is

$$h^2 = \frac{\sigma_{\text{GEBV}}^2}{\sigma_{\text{GEBV}}^2 + \sigma_s^2 + \sigma_e^2}$$

for each treatment. The `get.Hsq` function calculates the broad-sense (among-accession) heritability:

$$H^2 = \frac{\sigma_{\text{GEBV}}^2 + \sigma_s^2}{\sigma_{\text{GEBV}}^2 + \sigma_s^2 + \sigma_e^2}$$

The `get.nad` function calculates the fraction of total variance contributed by the non-additive effects alone:

$$FVE_s = \frac{\sigma_s^2}{\sigma_{\text{GEBV}}^2 + \sigma_s^2 + \sigma_e^2}$$

I read in covariance matrix chains.

```

> diagInd <- diag(matrix(1:(d^2), ncol = d, byrow = T))
> chn1 <- matrix(.C("GSLmatLoad",
+   "../chains/SgS_3_1.gbin",
+   as.integer(chnLen), as.integer(d^2), out = double(chnLen*d^2))$out,
+   nrow = chnLen, byrow = T)[,diagInd]
> chn1 <- cbind(chn1,
+   matrix(.C("GSLmatLoad",
+   "../chains/SgE_3_1.gbin",
+   as.integer(chnLen), as.integer(d^2), out = double(chnLen*d^2))$out,
+   nrow = chnLen, byrow = T)[,diagInd])
> chn2 <- matrix(.C("GSLmatLoad",
+   "../chains/SgS_3_2.gbin",
+   as.integer(chnLen), as.integer(d^2), out = double(chnLen*d^2))$out,
+   nrow = chnLen, byrow = T)[,diagInd]
> chn2 <- cbind(chn2,
+   matrix(.C("GSLmatLoad",
+   "../chains/SgE_3_2.gbin",
+   as.integer(chnLen), as.integer(d^2), out = double(chnLen*d^2))$out,

```

```

+       nrow = chnLen, byrow = T)[,diagInd])
> chn3 <- matrix(.C("GSLmatLoad",
+   "../chains/SgS_3_3.gbin",
+   as.integer(chnLen), as.integer(d^2), out = double(chnLen*d^2))$out,
+   nrow = chnLen, byrow = T)[,diagInd])
> chn3 <- cbind(chn3,
+   matrix(.C("GSLmatLoad",
+   "../chains/SgE_3_3.gbin",
+   as.integer(chnLen), as.integer(d^2), out = double(chnLen*d^2))$out,
+   nrow = chnLen, byrow = T)[,diagInd])
> chn4 <- matrix(.C("GSLmatLoad",
+   "../chains/SgS_3_4.gbin",
+   as.integer(chnLen), as.integer(d^2), out = double(chnLen*d^2))$out,
+   nrow = chnLen, byrow = T)[,diagInd])
> chn4 <- cbind(chn4,
+   matrix(.C("GSLmatLoad",
+   "../chains/SgE_3_4.gbin",
+   as.integer(chnLen), as.integer(d^2), out = double(chnLen*d^2))$out,
+   nrow = chnLen, byrow = T)[,diagInd])
> chn5 <- matrix(.C("GSLmatLoad",
+   "../chains/SgS_3_5.gbin",
+   as.integer(chnLen), as.integer(d^2), out = double(chnLen*d^2))$out,
+   nrow = chnLen, byrow = T)[,diagInd])
> chn5 <- cbind(chn5,
+   matrix(.C("GSLmatLoad",
+   "../chains/SgE_3_5.gbin",
+   as.integer(chnLen), as.integer(d^2), out = double(chnLen*d^2))$out,
+   nrow = chnLen, byrow = T)[,diagInd])
> sigChn <- rbind(chn1, chn2, chn3, chn4, chn5)
> sigChn <- cbind(t(apply(gebvCHN, 1, makeVar)), sigChn)
> chnhsq <- t(apply(sigChn, 1, get.hsq))
> chnHsq <- t(apply(sigChn, 1, get.Hsq))
> chnNad <- t(apply(sigChn, 1, get.nad))
> hsqHPD <- as.data.frame(rbind(t(apply(chnhsq, 2, quantileLike)),
+   t(apply(chnHsq, 2, quantileLike))))
> hsqHPD$treatment <- rep(trtNam, times=2)
> hsqHPD$heritability <- rep(c("GEBV", "Broad"), each=d)
> fveHPD <- as.data.frame(rbind(t(apply(chnhsq, 2, quantileLike)),
+   t(apply(chnNad, 2, quantileLike))))
> fveHPD$treatment <- rep(trtNam, times=2)
> fveHPD$variance <- factor(rep(c("Marker", "Background"), each=d),
+   levels=c("Marker", "Background"))

```

Now plot both kinds of heritabilities on the same panel.

```
> pdfFlNam <- "heritabilityADD.pdf"
```

```

> showtext_auto()
> ggplot(data=hsqHPD, aes(x=1:nrow(hsqHPD), y=mode, color=heritability)) +
+   geom_segment(aes(x=1:nrow(hsqHPD), y=lower95, xend=1:nrow(hsqHPD),
+     yend=upper95, color=heritability),
+     size=1.2) +
+   geom_segment(aes(x=1:nrow(hsqHPD), y=lower50, xend=1:nrow(hsqHPD),
+     yend=upper50, color=heritability),
+     size=1.75) +
+   geom_point(size=2) +
+   theme_classic(base_size=18, base_family="myriad") +
+   theme(legend.title=element_blank(),
+     strip.background=element_rect(fill="grey95", linetype="blank")) +
+   scale_x_continuous(breaks=1:nrow(hsqHPD), labels=rep(trtNam, 2)) +
+   ylim(c(0,1)) +
+   labs(y="heritability", x="treatment")
> ggsave(pdfFlNam, width=8, height=8, units="in", device="pdf", useDingbats=F)
> cat("\\\\includegraphics{" , pdfFlNam, "}\\n\\n", sep="")

```

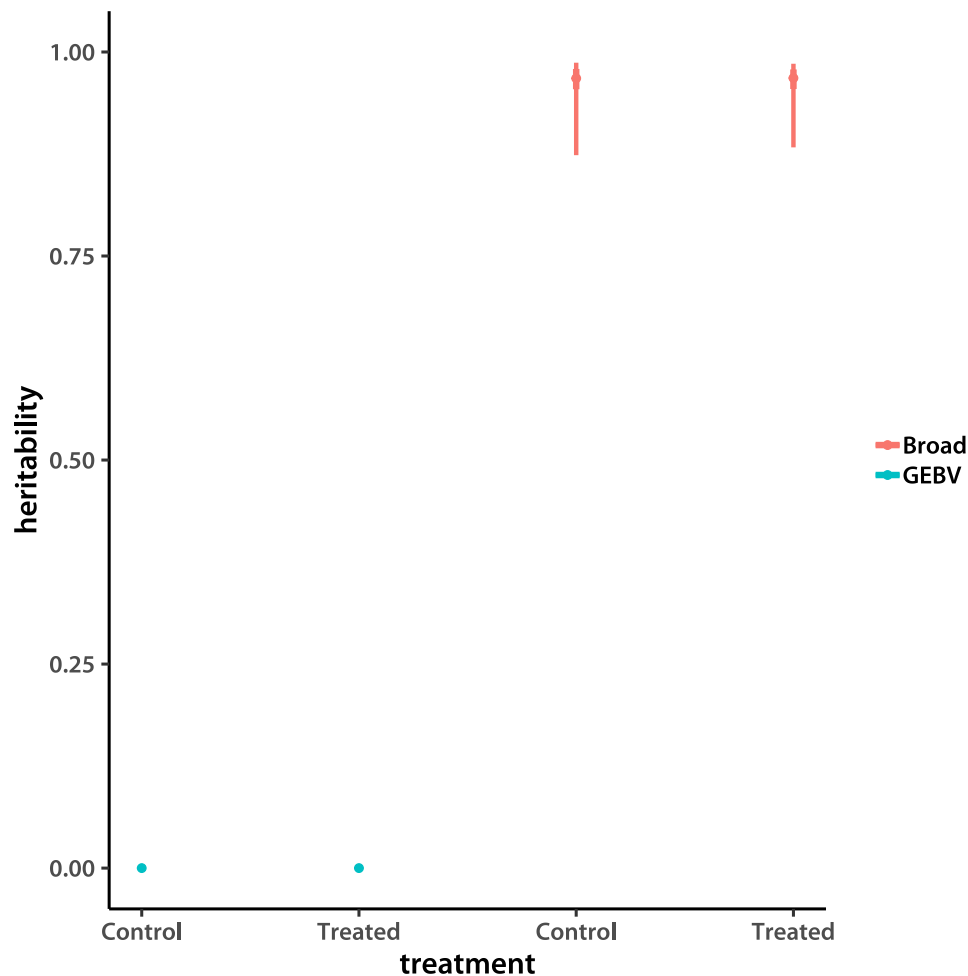

Finally plot fractions of variance explained on the same panel.

```
> pdfFlNam <- "fveADD.pdf"
> showtext_auto()
> ggplot(data=fveHPD, aes(x=1:nrow(fveHPD), y=mode, color=variance)) +
+   geom_segment(aes(x=1:nrow(fveHPD), y=lower95, xend=1:nrow(fveHPD),
+     yend=upper95, color=variance),
+     size=1.2) +
+   geom_segment(aes(x=1:nrow(fveHPD), y=lower50, xend=1:nrow(fveHPD),
+     yend=upper50, color=variance),
+     size=1.75) +
+   geom_point(size=2) +
+   theme_classic(base_size=18, base_family="myriad") +
+   theme(legend.title=element_blank(),
+     strip.background=element_rect(fill="grey95", linetype="blank")) +
+   scale_x_continuous(breaks=1:nrow(fveHPD), labels=rep(trtNam, 2)) +
+   ylim(c(0,1)) +
+   labs(y="fraction of variance", x="treatment")
> ggsave(pdfFlNam, width=8, height=8, units="in", device="pdf", useDingbats=F)
> cat("\\\\includegraphics{" , pdfFlNam, "}\\n\\n", sep="")
```

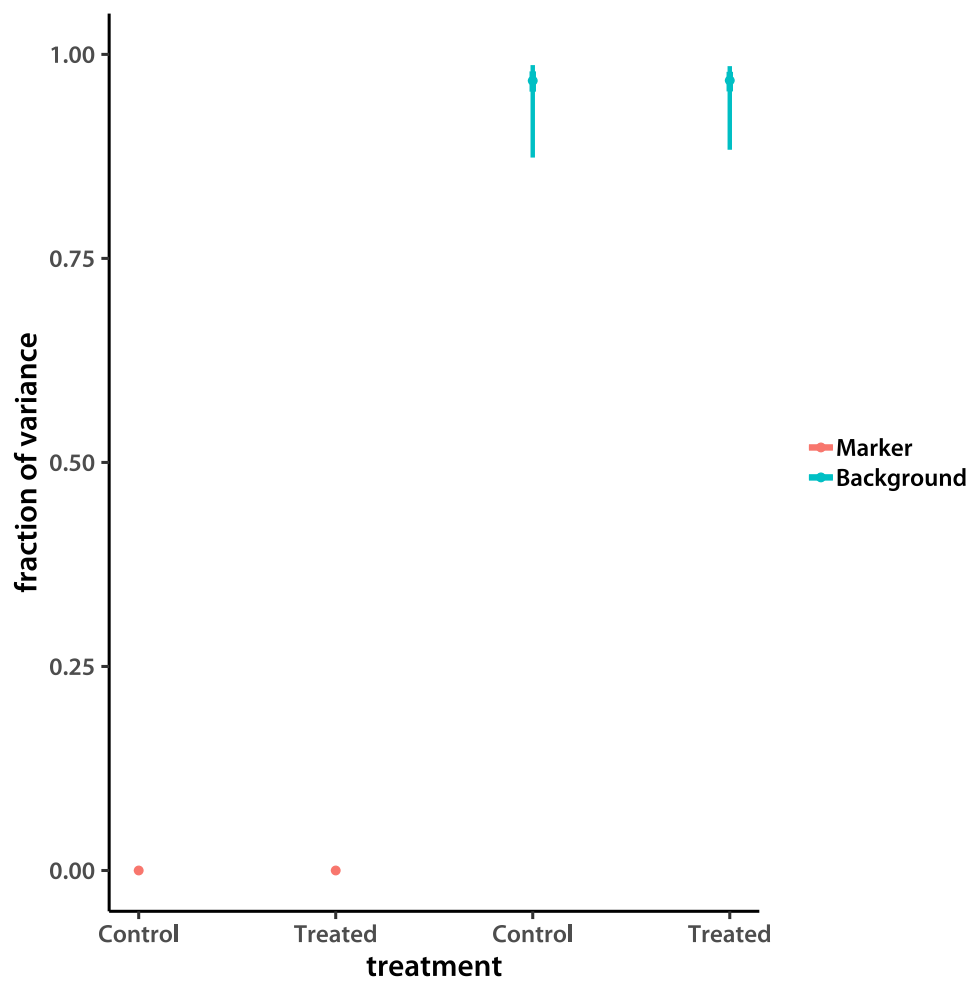

Supplement: Supplementary file 1 [file 1]
