# Supplementary material
Source: publisher figshare collection journal article supplement (https://gsajournals.figshare.com/articles/dataset/_/10321538)

# Markov chain results

Tony Greenberg

March 25, 2019

```
R version 3.5.2 (2018-12-20)
Platform: x86_64-pc-linux-gnu (64-bit)
Running under: Arch Linux
```

```
Matrix products: default
BLAS/LAPACK: /opt/intel/compilers_and_libraries_2019.1.144/linux/mkl/lib/intel64_lin/libmkl_gf_lp64.so
```

```
locale:
 [1] LC_CTYPE=en_US.UTF-8      LC_NUMERIC=C               LC_TIME=en_US.UTF-8
 [4] LC_COLLATE=en_US.UTF-8    LC_MONETARY=en_US.UTF-8    LC_MESSAGES=en_US.UTF-8
 [7] LC_PAPER=en_US.UTF-8      LC_NAME=C                  LC_ADDRESS=C
[10] LC_TELEPHONE=C            LC_MEASUREMENT=en_US.UTF-8 LC_IDENTIFICATION=C
```

```
attached base packages:
[1] compiler stats      graphics grDevices utils      datasets methods    base
```

```
other attached packages:
[1] showtext_0.6 showtextdb_2.0 sysfonts_0.8 gridExtra_2.3 ggplot2_3.1.0
```

```
loaded via a namespace (and not attached):
 [1] Rcpp_1.0.0      crayon_1.3.4    withr_2.1.2     grid_3.5.2      plyr_1.8.4
 [6] gtable_0.2.0    scales_1.0.0    pillar_1.3.1    rlang_0.3.1     lazyeval_0.2.1
[11] tools_3.5.2     munsell_0.5.0   pkgconfig_2.0.2 colorspace_1.4-0 tibble_2.0.1
```

In this document I summarize the results of modeling the old AI tolerance data using Bayesian hierarchical modeling.

## 1 Model

I used the following hierarchical model to account for experiments from a number of years.

$$\begin{aligned}
\mathbf{y}_{i\cdot} &\sim N_d \left( \boldsymbol{\mu}_{j[i]\cdot}^{acc} + \mathbf{x}_{i\cdot}^{EXP} \mathbf{B}^{EXP}; \boldsymbol{\Sigma}_e \right) \\
\boldsymbol{\mu}_{j\cdot}^{acc} &\sim N_d (\boldsymbol{\mu} + \mathbf{u}_{j\cdot} \boldsymbol{\Gamma}; \boldsymbol{\Sigma}_s) \\
\gamma_{j\cdot} &\sim t_{\nu_g, d} (\mathbf{0}_d; \boldsymbol{\Sigma}_a) \\
\boldsymbol{\Sigma}_e^{-1} &\sim W_{d, \nu_0} \left( \left[ \sum_i \left( \mathbf{y}_{i\cdot} - \boldsymbol{\mu}_{j[i]\cdot}^{acc} - \mathbf{x}_{i\cdot}^{EXP} \mathbf{B}^{EXP} \right) \left( \mathbf{y}_{i\cdot} - \boldsymbol{\mu}_{j[i]\cdot}^{acc} - \mathbf{x}_{i\cdot}^{EXP} \mathbf{B}^{EXP} \right)^T \right]^{-1} \right) \\
\boldsymbol{\Sigma}_s^{-1} &\sim W_{d, \nu_0} \left( \left[ \sum_j \left( \boldsymbol{\mu}_{j\cdot}^{acc} - \boldsymbol{\mu} - \mathbf{u}_{j\cdot} \boldsymbol{\Gamma} \right) \left( \boldsymbol{\mu}_{j\cdot}^{acc} - \boldsymbol{\mu} - \mathbf{u}_{j\cdot} \boldsymbol{\Gamma} \right)^T \right]^{-1} \right) \\
\boldsymbol{\Sigma}_a^{-1} &\sim W_{d, \nu_0} \left( [\boldsymbol{\Gamma}^T \boldsymbol{\Gamma}]^{-1} \right),
\end{aligned}$$

where bold lower-case symbols refer to row vectors and bold upper-case symbols are matrices. All vectors are of length  $d$  and all matrices have  $d$  columns, where  $d$  is the number of traits ( $d = 2$  in our case).  $\mathbf{X}^{EXP}$  is the matrix of experiment IDs and  $\mathbf{B}^{EXP}$  contains experimental effect coefficients. These are essentially years, but see the `phenoDataPrep` documents for details. The  $\mathbf{U}$  matrix contains principal components of the genetic relationship matrix, scaled by square roots of their eigenvalues. The  $\mathbf{U}\boldsymbol{\Gamma}$  matrix is the matrix of GEBVs (marker breeding values). The degrees of freedom parameter  $\nu_g$  was set to 3, the smallest value that results in a distribution with all moments defined. Notation of the  $i\cdot$  type refers to rows in matrices. Subscripts of the  $j[i]$  type refer to a row  $j$  in a upper level (in the model hierarchy) that corresponds to a replicate row  $i$ . Note also that the residual covariance matrix  $\boldsymbol{\Sigma}_e^{-1}$  is diagonal, since the experiment and control phenotypes were measured on different plants and thus the residual correlation is undefined. Location parameters without priors were modeled with very high-variance Gaussian priors.

I define functions that calculate summaries of Markov chains.

```

> pmode <- cmpfun(function(vec){
+   dst <- density(vec, adjust = 2)
+   mxi <- which(dst$y == max(dst$y))
+   if(length(mxi) > 1){
+     warning("More than one mode in call to pmode(); picking randomly")
+     mxi <- sample(mxi, 1)
+   }
+   dst$x[mxi]
+ })
> HPDint <- cmpfun(function(vec, prob = 0.95){
+   nsamp <- length(vec)
+   if (nsamp <= 2) stop("vector must have length > 2")
+
+   vals <- sort(vec)
+   gap <- max(1, min(nsamp - 1, round(nsamp * prob)))
+   init <- 1:(nsamp - gap)
+   mInd <- which.min(vals[init + gap] - vals[init])

```

```
+   res  <- c(vals[mInd], vals[mInd + gap])
+   names(res) <- c("lower", "upper")
+   return(res)
+ })
```

Next, I write a function that is similar to `quantile()`, but outputs the mode, lower and upper limits of the 95% and 50% HPD. The `outr` parameter is the probability for the outer margins, default is 95%.

```
> quantileLike <- cmpfun(function(vec, outr = 0.95){
+   if(outr <= 0.5) stop("Outer margin has to be >= 50%")
+   md    <- pmode(vec)
+   hpd95 <- HPDint(vec, outr)
+   hpd50 <- HPDint(vec, 0.5)
+   res   <- c(hpd95[1], hpd50[1], md, hpd50[2], hpd95[2])
+
+   outNm <- paste(c("lower", "upper"), outr*100, sep = "")
+   names(res) <- c(outNm[1], "lower50", "mode", "upper50", outNm[2])
+   return(res)
+ })
```

## 2 Experiment effect

I start by checking the experiment effect. Start with the *aus* results.

I start with total accession means.

```
> trtNam <- c("Control", "Treated")
> d      <- 2
> Nexp   <- 6
> expDim <- d*Nexp
> nChn   <- 5
> chnLen <- 2000
> chn    <- NULL
> addSamp <- cmpfun(function(i, vrNam, popNam, ncl){
+   inFlNam <- paste("chains/", vrNam, "out_", popNam, "_3_", i, ".gbin", sep = "")
+   chn <-- rbind(chn,
+     matrix(.C("GSLmatLoad",
+       inFlNam, as.integer(chnLen), as.integer(ncl),
+       out = double(chnLen*ncl))$out,
+       nrow = chnLen, byrow = T)
+   )
+   return(NULL)
+ })
> trash <- sapply(1:nChn, addSamp, "EXP", "aus", expDim)
> expID <- scan(file = "expIDs.txt", what=character())
> expMnAUS <- as.data.frame(t(apply(chn, 2, quantileLike)))
```

```
> expMnAUS$trait      <- rep(trtNam, times = Nexp)
> expMnAUS$experiment <- rep(expID, each=d)

> ggTrt1 <- ggplot(data=subset(expMnAUS, trait==trtNam[1]), aes(x=experiment,y=mode)) +
+   geom_segment(aes(x=experiment, y=lower95, xend=experiment, yend=upper95),
+     color="grey80", size=0.75) +
+   geom_segment(aes(x=experiment, y=lower50, xend=experiment, yend=upper50),
+     color="grey50", size=1) +
+   geom_point() +
+   theme_classic(base_size=18, base_family="myriad") +
+   theme(axis.title.x=element_blank(), axis.ticks.x=element_blank()) +
+   labs(y=trtNam[1])
> ggTrt2 <- ggplot(data=subset(expMnAUS, trait==trtNam[2]), aes(x=experiment,y=mode)) +
+   geom_segment(aes(x=experiment, y=lower95, xend=experiment, yend=upper95),
+     color="grey80", size=0.75) +
+   geom_segment(aes(x=experiment, y=lower50, xend=experiment, yend=upper50),
+     color="grey50", size=1) +
+   geom_point() +
+   theme_classic(base_size=18, base_family="myriad") +
+   theme(axis.ticks.x=element_blank()) +
+   labs(y=trtNam[2])
> showtext_auto()
> grid.arrange(ggTrt1, ggTrt2, nrow = 2)
```

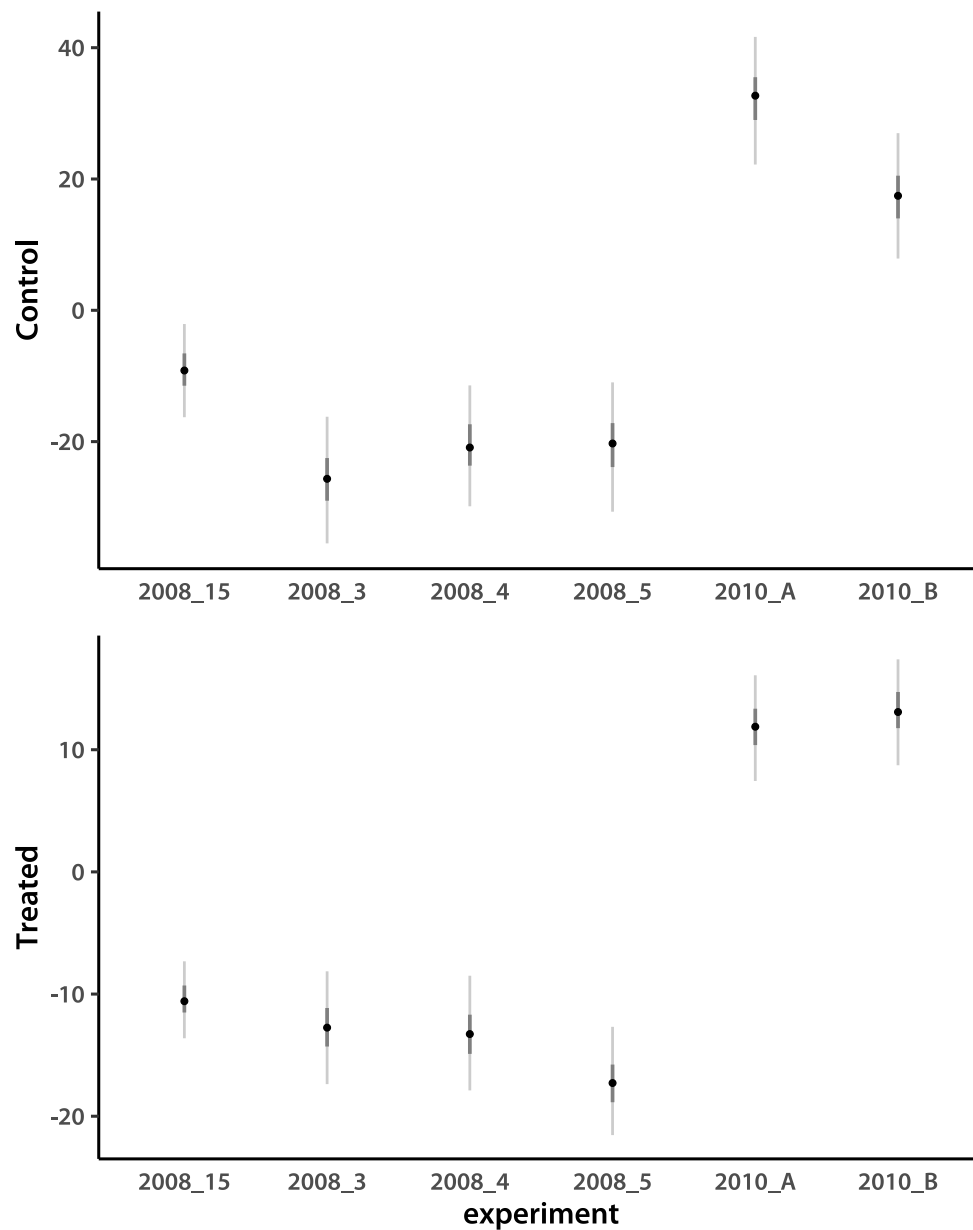

The estimates look reasonable compared to plots of raw data. I look at the tropical *japonica* results.

```
> chn <- NULL
> trash <- sapply(1:nChn, addSamp, "EXP", "trj", expDim)
> expMnTRJ <- as.data.frame(t(apply(chn, 2, quantileLike)))
> expMnTRJ$trait <- rep(trtNam, times = Nexp)
> expMnTRJ$experiment <- rep(expID, each=d)

> ggTrt1 <- ggplot(data=subset(expMnTRJ, trait==trtNam[1]), aes(x=experiment,y=mode)) +
+   geom_segment(aes(x=experiment, y=lower95, xend=experiment, yend=upper95),
```

```
+       color="grey80", size=0.75) +
+     geom_segment(aes(x=experiment, y=lower50, xend=experiment, yend=upper50),
+       color="grey50", size=1) +
+     geom_point() +
+     theme_classic(base_size=18, base_family="myriad") +
+     theme(axis.title.x=element_blank(), axis.ticks.x=element_blank()) +
+     labs(y=trtNam[1])
> ggTrt2 <- ggplot(data=subset(expMnTRJ, trait==trtNam[2]), aes(x=experiment,y=mode)) +
+     geom_segment(aes(x=experiment, y=lower95, xend=experiment, yend=upper95),
+       color="grey80", size=0.75) +
+     geom_segment(aes(x=experiment, y=lower50, xend=experiment, yend=upper50),
+       color="grey50", size=1) +
+     geom_point() +
+     theme_classic(base_size=18, base_family="myriad") +
+     theme(axis.ticks.x=element_blank()) +
+     labs(y=trtNam[2])
> showtext_auto()
> grid.arrange(ggTrt1, ggTrt2, nrow = 2)
```

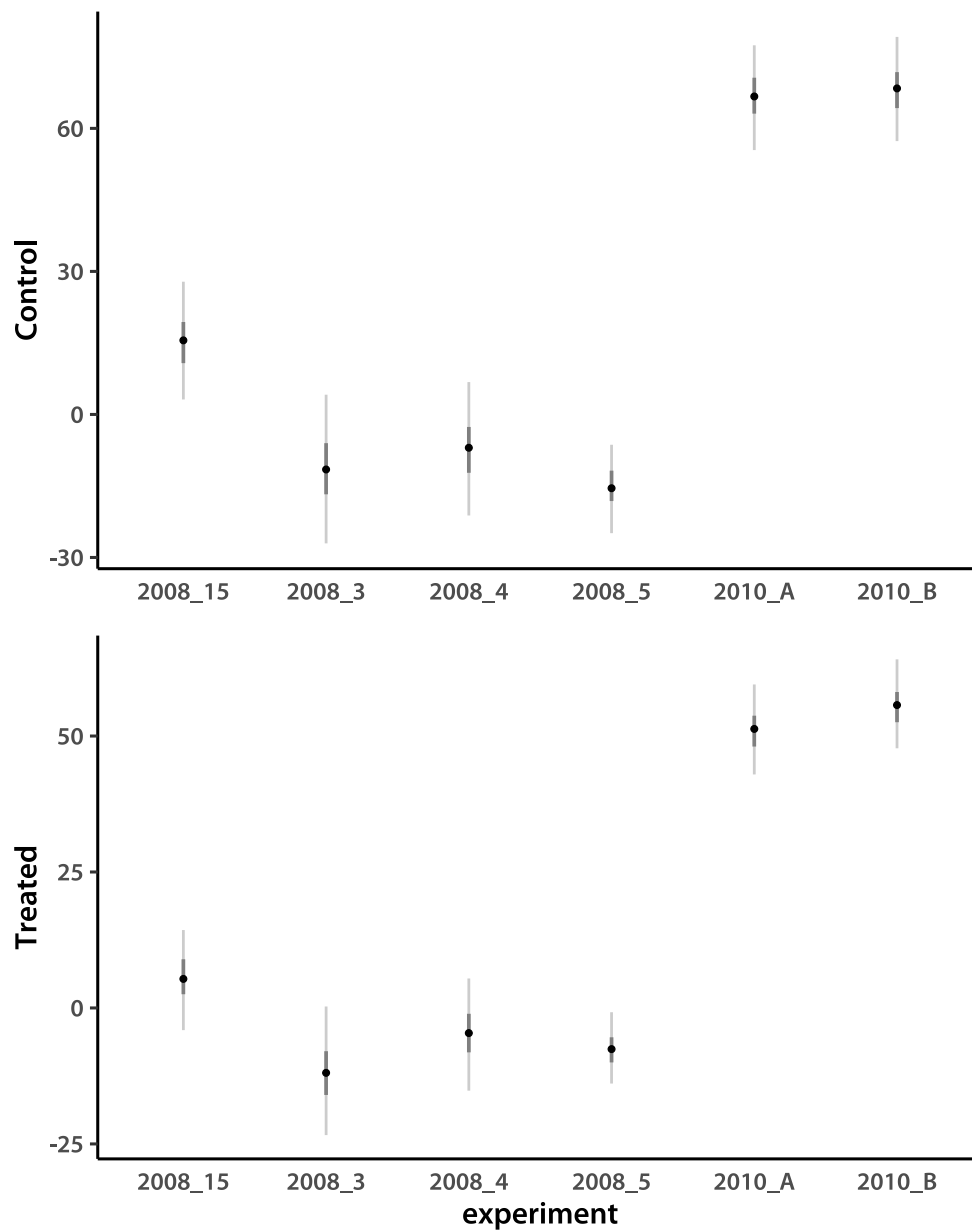

Results are very similar to *aus*. Finally, I look at the admixed tropical *japonica* results.

```
> chn <- NULL
> trash <- sapply(1:nChn, addSamp, "EXP", "trja", expDim)
> expMnTRJA <- as.data.frame(t(apply(chn, 2, quantileLike)))
> expMnTRJA$trait <- rep(trtNam, times = Nexp)
> expMnTRJA$experiment <- rep(expID, each=d)

> ggTrt1 <- ggplot(data=subset(expMnTRJA, trait==trtNam[1]), aes(x=experiment,y=mode)) +
+   geom_segment(aes(x=experiment, y=lower95, xend=experiment, yend=upper95),
```

```
+       color="grey80", size=0.75) +
+     geom_segment(aes(x=experiment, y=lower50, xend=experiment, yend=upper50),
+       color="grey50", size=1) +
+     geom_point() +
+     theme_classic(base_size=18, base_family="myriad") +
+     theme(axis.title.x=element_blank(), axis.ticks.x=element_blank()) +
+     labs(y=trtNam[1])
> ggTrt2 <- ggplot(data=subset(expMnTRJA, trait==trtNam[2]), aes(x=experiment,y=mode)) +
+     geom_segment(aes(x=experiment, y=lower95, xend=experiment, yend=upper95),
+       color="grey80", size=0.75) +
+     geom_segment(aes(x=experiment, y=lower50, xend=experiment, yend=upper50),
+       color="grey50", size=1) +
+     geom_point() +
+     theme_classic(base_size=18, base_family="myriad") +
+     theme(axis.ticks.x=element_blank()) +
+     labs(y=trtNam[2])
> showtext_auto()
> grid.arrange(ggTrt1, ggTrt2, nrow = 2)
```

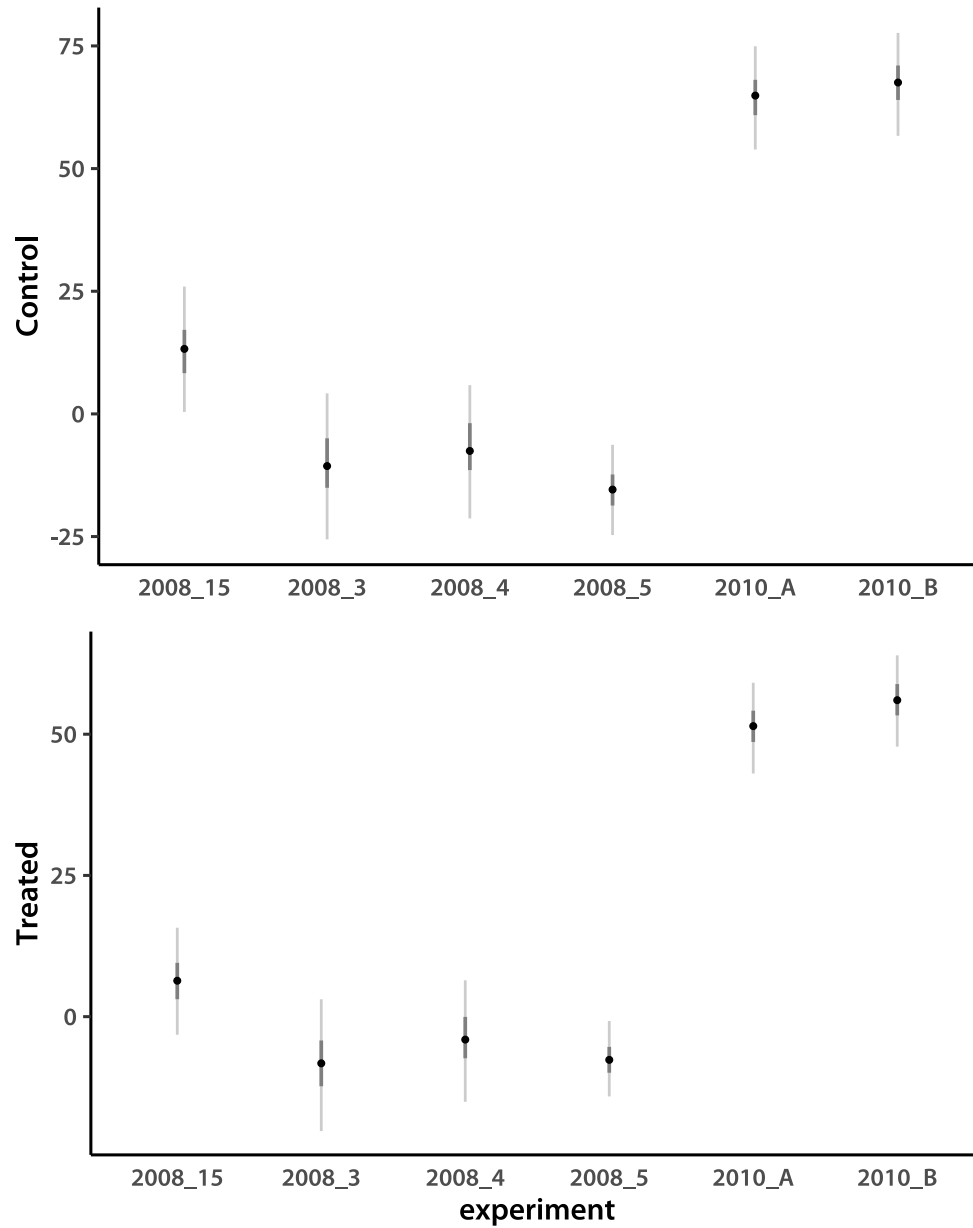

### 3 Accession means

Next, I look at accession means. Their variance reflects broad-sense heritability. Starting with *aus*.

```
> Nacc    <- 55
> accDim  <- d*Nacc
> chn     <- NULL
> trash   <- sapply(1:nChn, addSamp, "LN", "aus", accDim)
> accMnAUS <- as.data.frame(t(apply(chn, 2, quantileLike)))
```

```
> accMnAUS$trait <- rep(trtNam, times = Nacc)
> accMnAUSs      <- accMnAUS[order(accMnAUS[,6], accMnAUS[,3]),]
```

I calculate the relative root growth and check if all values are positive.

```
> accNamAUS      <- scan(file="lineIDsAUS.txt", what=character())
> colnames(chn) <- paste(rep(trtNam, Nacc), rep(accNamAUS, each=d), sep=".")
> chnRRG         <- chn[,grep(trtNam[2], colnames(chn))]/chn[,grep(trtNam[1], colnames(chn))]
> sum(chnRRG<=0)
```

```
[1] 0
```

They are. I calculate the  $-\log_{10}(RRG)$  and save the modes of accession effect estimates for further analyses.

```
> rrgModeAUS      <- apply(-log10(chnRRG), 2, pmode)
> accModeTabAUS <- cbind(matrix(round(accMnAUS$mode, 4), ncol=d, byrow=T),
+   round(rrgModeAUS, 4))
> cat(c("NSFTVID\tControl\t160uM_A1\tneglgRRG",
+   apply(cbind(accNamAUS, accModeTabAUS), 1, paste, collapse="\t")),
+   file="accModeAUS.tsv", sep="\n"
+   )
> trash <- .C("GSLmatSave", "phenoData/accMdAUS.gbin",
+   as.double(accModeTabAUS), nrow(accModeTabAUS), ncol(accModeTabAUS))
```

I plot sorted accession means.

```
> pdfFlNam <- "lineMeansFAMaus.pdf"
> showtext_auto()
> ggplot(data=accMnAUSs, aes(x=1:nrow(accMnAUSs), y=mode)) +
+   geom_segment(aes(x=1:nrow(accMnAUSs), y=lower95, xend=1:nrow(accMnAUSs), yend=upper95),
+   color="grey80", size=0.75) +
+   geom_segment(aes(x=1:nrow(accMnAUSs), y=lower50, xend=1:nrow(accMnAUSs), yend=upper50),
+   color="grey50", size=1) +
+   geom_point() +
+   facet_wrap(~trait, scales="free", nrow=2) +
+   theme_classic(base_size=18, base_family="myriad") +
+   theme(axis.title.x=element_blank(), axis.text.x=element_blank(),
+   strip.background=element_rect(fill="grey95", linetype="blank"),
+   axis.ticks.x=element_blank()) +
+   labs(y="root length")
> ggsave(pdfFlNam, width=8, height=10, units="in", device="pdf", useDingbats=F)
> cat("\\includegraphics{" , pdfFlNam, "}" , sep="")
```

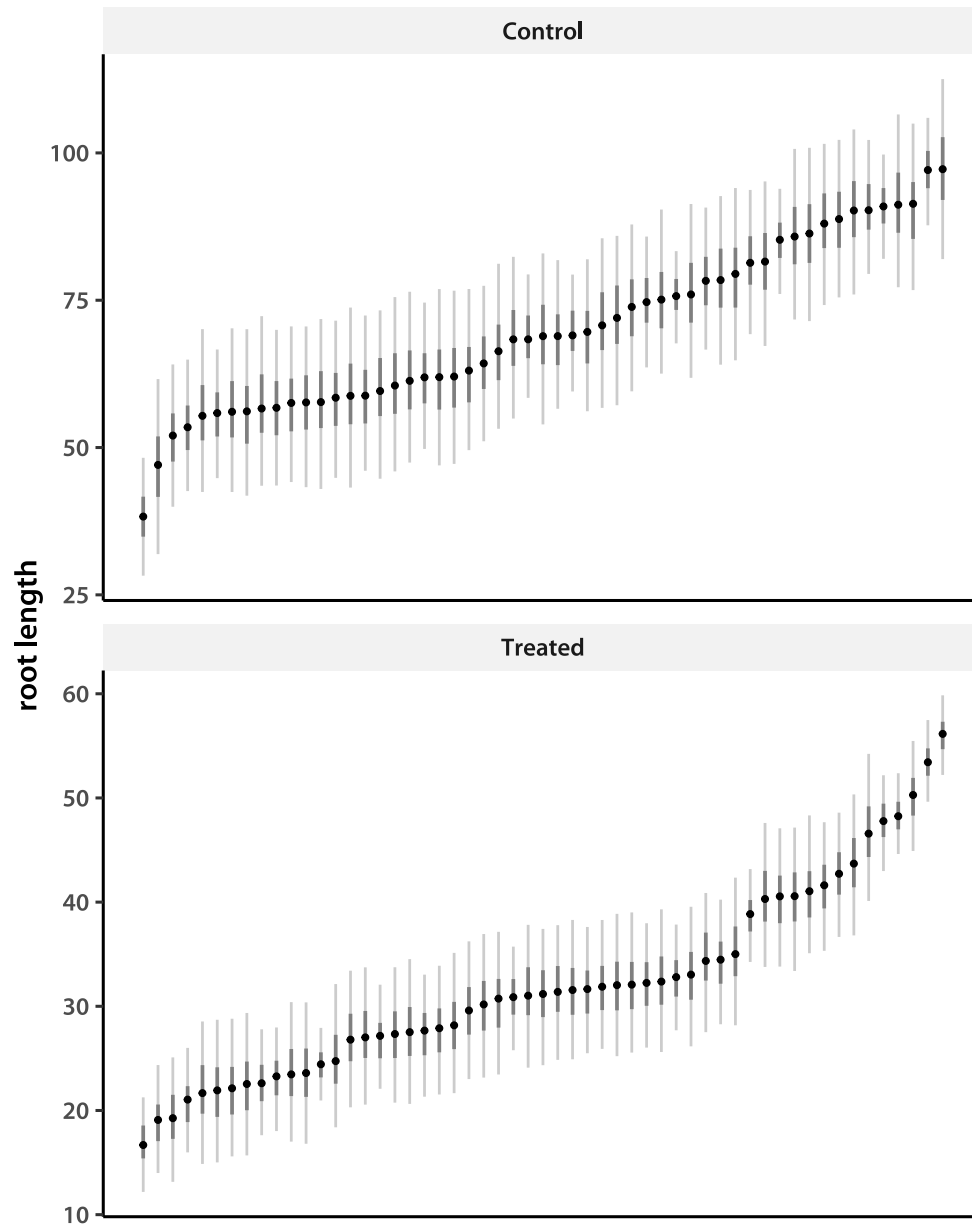

Seems like there are some particularly resistant accessions, which is expected when treatment has the desired stress effect. Now look at the tropical *japonica*.

```
> Nacc <- 92
> accDim <- d*Nacc
> chn <- NULL
> trash <- sapply(1:nChn, addSamp, "LN", "trj", accDim)
> accMnTRJ <- as.data.frame(t(apply(chn, 2, quantileLike)))
> accMnTRJ$trait <- rep(trtNam, times = Nacc)
> accMnTRJs <- accMnTRJ[order(accMnTRJ[,6], accMnTRJ[,3]),]
```

I calculate the relative root growth and check if all values are positive.

```
> accNamTRJ      <- scan(file="lineIDsTRJ.txt", what=character())
> colnames(chn) <- paste(rep(trtNam, Nacc), rep(accNamTRJ, each=d), sep=".")
> chnRRG         <- chn[,grep(trtNam[2], colnames(chn))]/chn[,grep(trtNam[1], colnames(chn))]
> sum(chnRRG<=0)
```

```
[1] 11652
```

There are negative values, due to correction for the experiment effect. I subtract the smallest value to make everything positive.

```
> chnRRG <- (chn[,grep(trtNam[2], colnames(chn))]-min(chn)+1e-4)/
+   (chn[,grep(trtNam[1], colnames(chn))]-min(chn)+1e-4)
> sum(chnRRG<=0)
```

```
[1] 0
```

I calculate the  $-\log_{10}(RRG)$  and save the modes of accession effect estimates for further analyses.

```
> rrgModeTRJ      <- apply(-log10(chnRRG), 2, pmode)
> accModeTabTRJ <- cbind(matrix(round(accMnTRJ$mode, 4), ncol=d, byrow=T),
+   round(rrgModeTRJ, 4))
> cat(c("NSFTVID\tControl\t160uM_A1\tneglgRRG",
+   apply(cbind(accNamTRJ, accModeTabTRJ), 1, paste, collapse="\t")),
+   file="accModeTRJ.tsv", sep="\n"
+   )
> trash <- .C("GSLmatSave", "phenoData/accMdTRJ.gbin",
+   as.double(accModeTabTRJ), nrow(accModeTabTRJ), ncol(accModeTabTRJ))
```

I plot sorted accession means.

```
> pdfFlNam <- "lineMeansFAMtrj.pdf"
> showtext_auto()
> ggplot(data=accMnTRJs, aes(x=1:nrow(accMnTRJs), y=mode)) +
+   geom_segment(aes(x=1:nrow(accMnTRJs), y=lower95, xend=1:nrow(accMnTRJs), yend=upper95),
+   color="grey80", size=0.75) +
+   geom_segment(aes(x=1:nrow(accMnTRJs), y=lower50, xend=1:nrow(accMnTRJs), yend=upper50),
+   color="grey50", size=1) +
+   geom_point() +
+   facet_wrap(~trait, scales="free", nrow=2) +
+   theme_classic(base_size=18, base_family="myriad") +
+   theme(axis.title.x=element_blank(), axis.text.x=element_blank(),
+   strip.background=element_rect(fill="grey95", linetype="blank"),
+   axis.ticks.x=element_blank()) +
+   labs(y="root length")
> ggsave(pdfFlNam, width=8, height=10, units="in", device="pdf", useDingbats=F)
> cat("\\includegraphics{" , pdfFlNam, "}" , sep="")
```

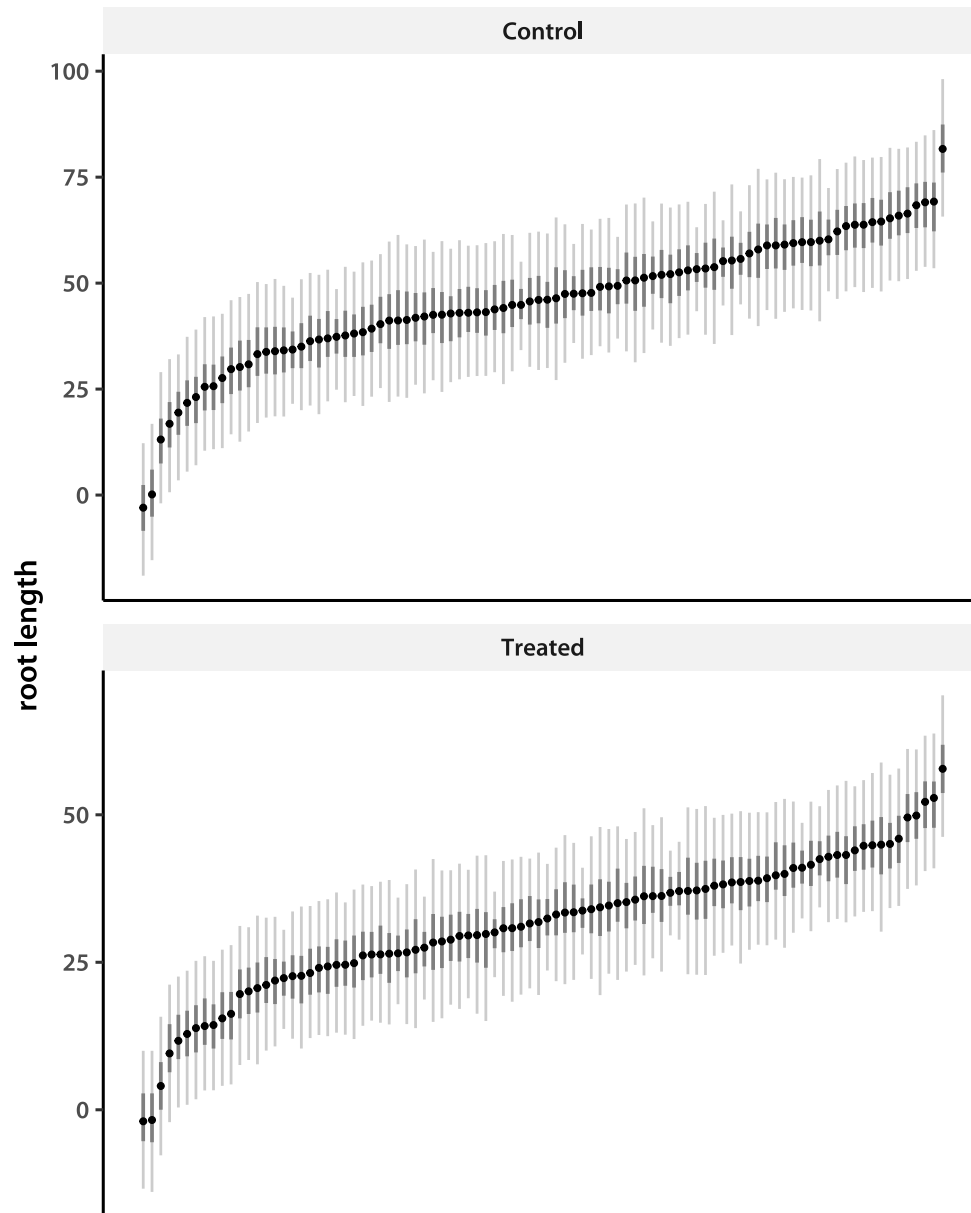

The distributions are very similar. Finally, look at the admixed tropical *japonica*.

```
> Nacc <- 95
> accDim <- d*Nacc
> chn <- NULL
> trash <- sapply(1:nChn, addSamp, "LN", "trja", accDim)
> accNamTRJA <- scan(file="lineIDsTRJA.txt", what=character())
> accNamADM <- scan(file="lineIDsADM.txt", what=character())
> accMnTRJA <- as.data.frame(t(apply(chn, 2, quantileLike)))
> accMnTRJA$trait <- rep(trtNam, times = Nacc)
```

```
> accMnTRJA$admix <- rep(ifelse(accNamTRJA %in% accNamADM, "admixed", "pure"), each=d)
> accMnTRJAs <- accMnTRJA[order(accMnTRJA[,6], accMnTRJA[,3]),]
```

Save the modes to a text file.

```
> accModeTabTRJA <- matrix(round(accMnTRJA$mode, 4), ncol=d, byrow=T)
> cat(c("NSFTVID\tControl\t160uM_A1",
+       apply(cbind(accNamTRJA, accModeTabTRJA), 1, paste, collapse="\t"),
+       file="accModeTRJA.tsv", sep="\n"
+       )
>
```

I plot sorted accession means.

```
> pdfFlNam <- "lineMeansFAMtrja.pdf"
> showtext_auto()
> ggplot(data=accMnTRJAs, aes(x=1:nrow(accMnTRJAs), y=mode)) +
+   geom_segment(aes(x=1:nrow(accMnTRJAs), y=lower95, xend=1:nrow(accMnTRJAs), yend=upper95)
+   color="grey80", size=0.75) +
+   geom_segment(aes(x=1:nrow(accMnTRJAs), y=lower50,
+   xend=1:nrow(accMnTRJAs), yend=upper50, color=admix), size=1.5) +
+   geom_point(size=1.5, color="grey60") +
+   facet_wrap(~trait, scales="free", nrow=2) +
+   theme_classic(base_size=18, base_family="myriad") +
+   theme(axis.title.x=element_blank(), axis.text.x=element_blank(),
+   strip.background=element_rect(fill="grey95", linetype="blank"),
+   axis.ticks.x=element_blank(), legend.title=element_blank()) +
+   labs(y="root length")
> ggsave(pdfFlNam, width=8, height=10, units="in", device="pdf", useDingbats=F)
> cat("\\\\includegraphics{" , pdfFlNam, "}\\n\\n", sep="")
```

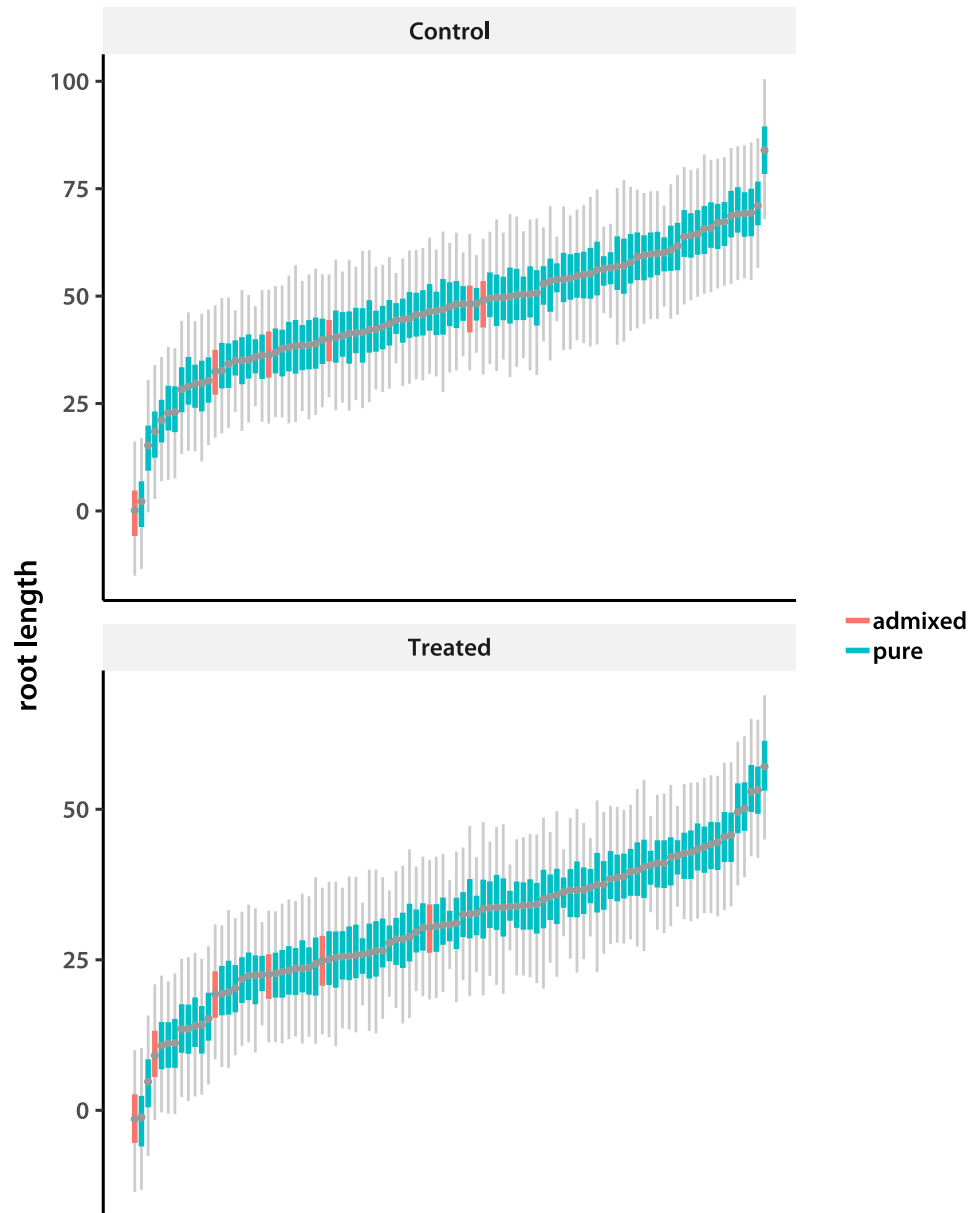

The admixed lines have smaller roots even in control, and even smaller in treatment (compared to the average tropical *japonica*). I test this more formally by estimating mean rank of the admixed accessions, compared to the overall mean (which is  $(1 + N_{acc})/2$ ).

```
> admInd <- accNamTRJA %in% accNamADM
> mnRank <- cmpfun(function(vec, ind){
+   colMeans(apply(matrix(vec, ncol=2, byrow=T), 2, rank)[ind,])
+ })
> rankChn <- t(apply(chn, 1, mnRank, admInd))
> rankMnTRJ <- as.data.frame(t(apply(rankChn, 2, quantileLike)))
```

```
> rankMnTRJ$trait <- trtNam
> rankMnTRJ
```

```
      lower95 lower50      mode upper50 upper95  trait
1 20.00000 25.83333 28.93652 32.50000 39.66667 Control
2 14.33333 18.16667 21.42600 23.66667 29.83333 Treated
```

Plot the ranks.

```
> pdfFlNam <- "rankAdmLineMeans.pdf"
> showtext_auto()
> ggplot(data=rankMnTRJ, aes(x=1:d,y=mode)) +
+   geom_segment(aes(x=1:d, y=lower95, xend=1:d, yend=upper95),
+     color="grey80", size=1.25) +
+   geom_segment(aes(x=1:d, y=lower50, xend=1:d, yend=upper50),
+     color="grey50", size=2) +
+   geom_point() +
+   geom_hline(yintercept=(mean(1:Nacc)), color="grey50") +
+   theme_classic(base_size=18, base_family="myriad") +
+   theme(axis.title.x=element_blank(), axis.text.x=element_blank(),
+     strip.background=element_rect(fill="grey95", linetype="blank"),
+     axis.ticks.x=element_blank()) +
+   labs(y="rank") + xlim(0.5, d+0.5) +
+   annotate("text", label="Control", x=1, y=min(rankMnTRJ$lower95)-2) +
+   annotate("text", label="Al treated", x=2, y=min(rankMnTRJ$lower95)-2)
> ggsave(pdfFlNam, width=8, height=8, units="in", device="pdf", useDingbats=F)
> cat("\\\\includegraphics{" , pdfFlNam, "}\\n\\n", sep="")
```

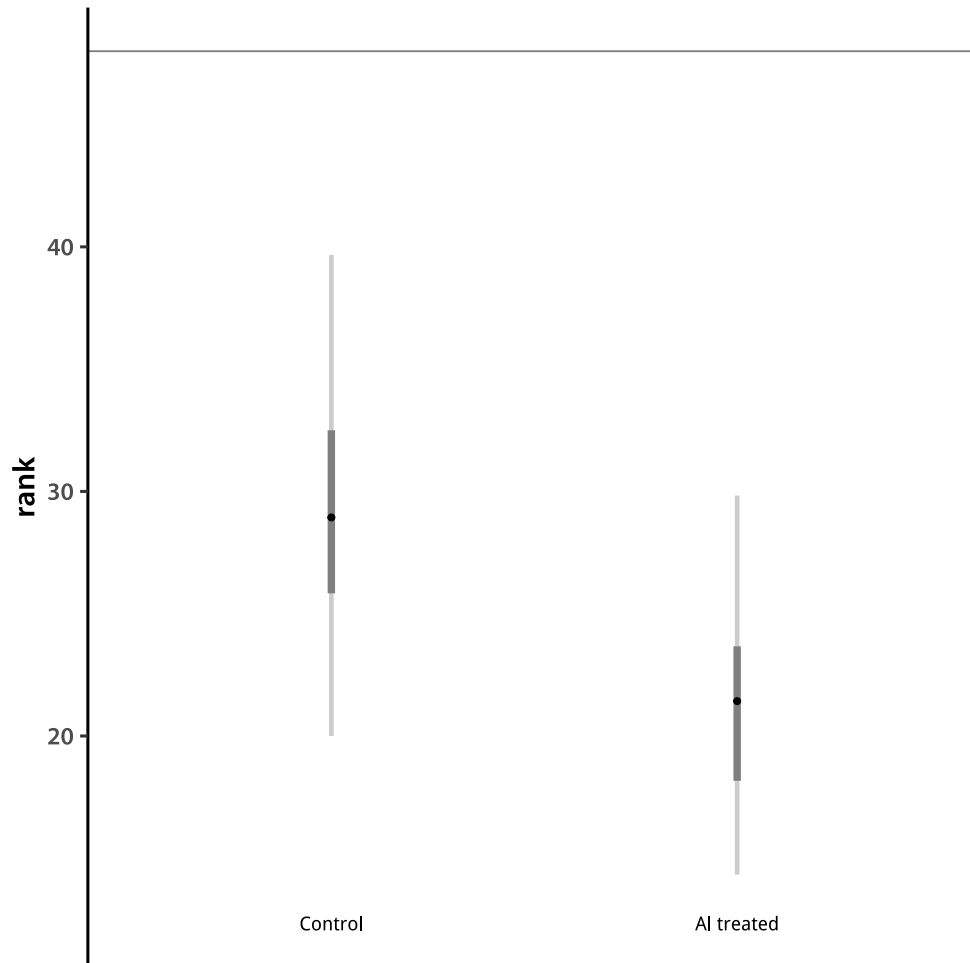

## 4 GEBV

I next examine the distributions of genome (or SNP) estimated breeding values (GEBV).

```
> Nacc    <- 55
> accDim  <- d*Nacc
> chn     <- NULL
> trash   <- sapply(1:nChn, addSamp, "BV", "aus", accDim)
> gebvChnAUS <- chn
> gebvMnAUS  <- as.data.frame(t(apply(chn, 2, quantileLike)))
> gebvMnAUS$trait <- rep(trtNam, times = Nacc)
> gebvMnAUSs    <- gebvMnAUS[order(gebvMnAUS[,6], gebvMnAUS[,3]),]
```

I plot sorted GEBVs.

```
> pdfFlNam <- "gebvFAMaus.pdf"
> showtext_auto()
```

```
> ggplot(data=gebvMnAUSs, aes(x=1:nrow(gebvMnAUSs),y=mode)) +  
+   geom_segment(aes(x=1:nrow(gebvMnAUSs), y=lower95, xend=1:nrow(gebvMnAUSs), yend=upper95)  
+     color="grey80", size=0.75) +  
+   geom_segment(aes(x=1:nrow(gebvMnAUSs), y=lower50, xend=1:nrow(gebvMnAUSs), yend=upper50)  
+     color="grey50", size=1) +  
+   geom_point() +  
+   facet_wrap(~trait, scales="free", nrow=2) +  
+   theme_classic(base_size=18, base_family="myriad") +  
+   theme(axis.title.x=element_blank(), axis.text.x=element_blank(),  
+     strip.background=element_rect(fill="grey95", linetype="blank"),  
+     axis.ticks.x=element_blank()) +  
+   labs(y="root length")  
> ggsave(pdfFlNam, width=8, height=10, units="in", device="pdf", useDingbats=F)  
> cat("\\\\includegraphics{" , pdfFlNam, "}\n\n", sep="")
```

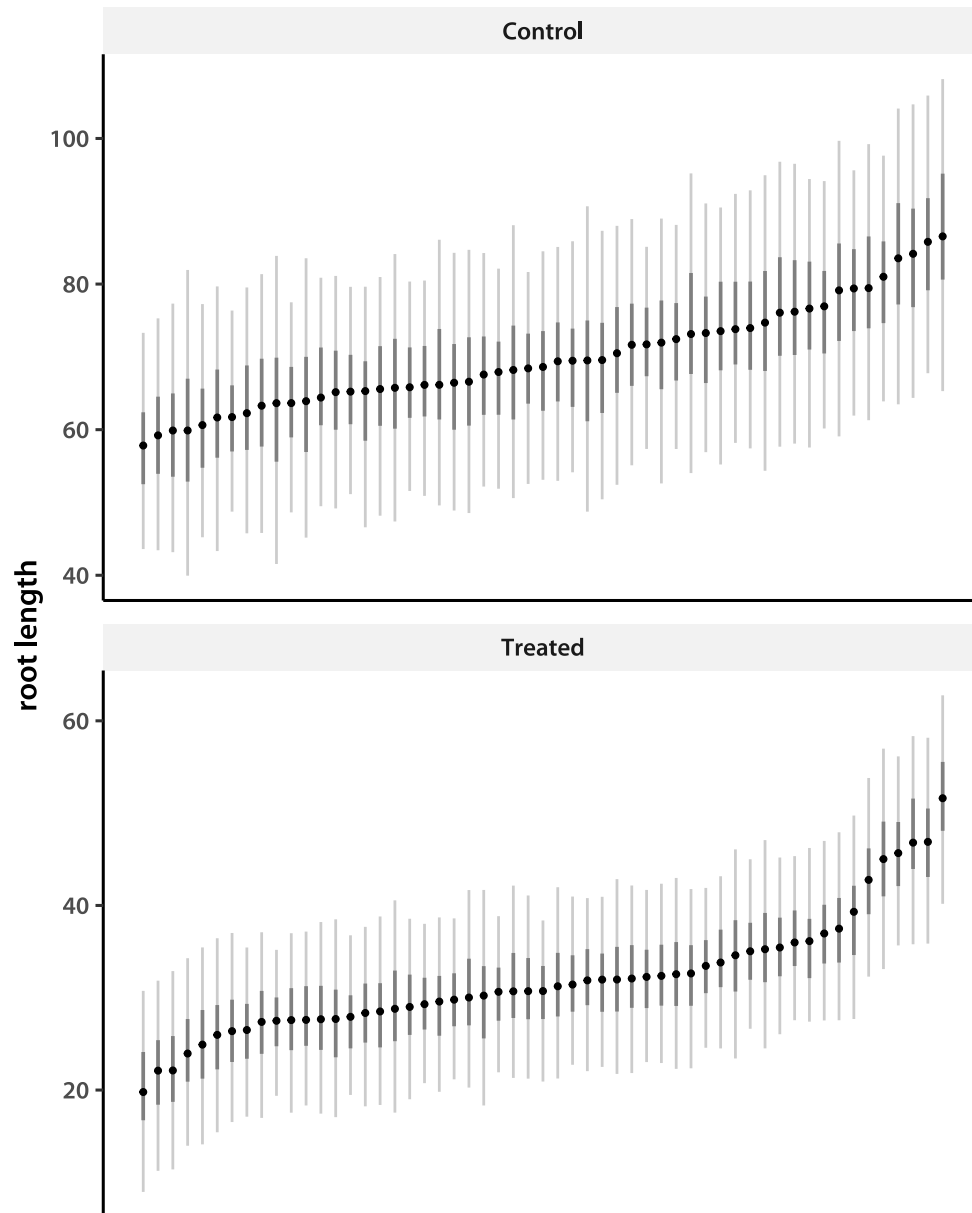

Again, seems like some breeding values stand out as high in the treated group. Now look at the tropical *japonica*.

```
> Nacc <- 92
> accDim <- d*Nacc
> chn <- NULL
> trash <- sapply(1:nChn, addSamp, "BV", "trj", accDim)
> gebvChnTRJ <- chn
> gebvMnTRJ <- as.data.frame(t(apply(chn, 2, quantileLike)))
> gebvMnTRJ$trait <- rep(trtNam, times = Nacc)
```

```
> gebvMnTRJs <- gebvMnTRJ[order(gebvMnTRJ[,6], gebvMnTRJ[,3]),]
```

I plot sorted accession means.

```
> pdfFlNam <- "gebvFAMtrj.pdf"
> showtext_auto()
> ggplot(data=gebvMnTRJs, aes(x=1:nrow(gebvMnTRJs),y=mode)) +
+   geom_segment(aes(x=1:nrow(gebvMnTRJs), y=lower95, xend=1:nrow(gebvMnTRJs), yend=upper95)
+     color="grey80", size=0.75) +
+   geom_segment(aes(x=1:nrow(gebvMnTRJs), y=lower50, xend=1:nrow(gebvMnTRJs), yend=upper50)
+     color="grey50", size=1) +
+   geom_point() +
+   facet_wrap(~trait, scales="free", nrow=2) +
+   theme_classic(base_size=18, base_family="myriad") +
+   theme(axis.title.x=element_blank(), axis.text.x=element_blank(),
+     strip.background=element_rect(fill="grey95", linetype="blank"),
+     axis.ticks.x=element_blank()) +
+   labs(y="root length")
> ggsave(pdfFlNam, width=8, height=10, units="in", device="pdf", useDingbats=F)
> cat("\\\\includegraphics{" , pdfFlNam, "}\n\n", sep="")
```

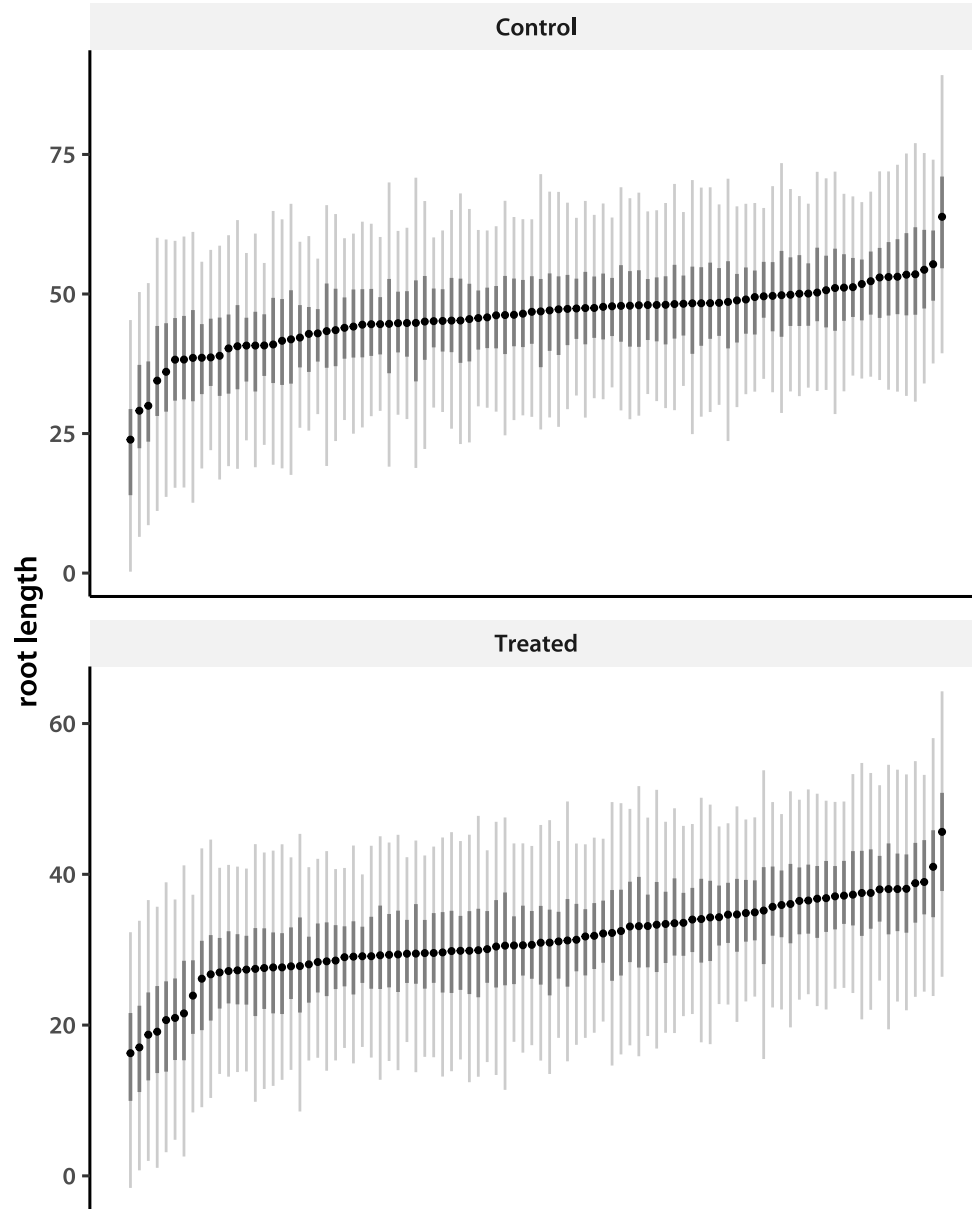

Finally, look at the admixed tropical *japonica*.

```
> Nacc <- 95
> accDim <- d*Nacc
> chn <- NULL
> trash <- sapply(1:nChn, addSamp, "BV", "trja", accDim)
> gebvChnTRJA <- chn
> gebvMnTRJA <- as.data.frame(t(apply(chn, 2, quantileLike)))
> gebvMnTRJA$trait <- rep(trtNam, times = Nacc)
> gebvMnTRJA$admix <- rep(ifelse(accNamTRJA %in% accNamADM, "admixed", "pure"), each=d)
```

```
> gebvMnTRJAs      <- gebvMnTRJA[order(gebvMnTRJA[,6], gebvMnTRJA[,3]),]
```

I plot sorted accession means.

```
> pdfFlNam <- "gebvFAMtrja.pdf"
> showtext_auto()
> ggplot(data=gebvMnTRJAs, aes(x=1:nrow(gebvMnTRJAs), y=mode, color=admix)) +
+   geom_segment(aes(x=1:nrow(gebvMnTRJAs), y=lower95, xend=1:nrow(gebvMnTRJAs), yend=upper95,
+     color="grey80", size=0.75) +
+   geom_segment(aes(x=1:nrow(gebvMnTRJAs), y=lower50, xend=1:nrow(gebvMnTRJAs), yend=upper50,
+     color="grey50", size=1) +
+   geom_point() +
+   facet_wrap(~trait, scales="free", nrow=2) +
+   theme_classic(base_size=18, base_family="myriad") +
+   theme(axis.title.x=element_blank(), axis.text.x=element_blank(),
+     strip.background=element_rect(fill="grey95", linetype="blank"),
+     axis.ticks.x=element_blank()) +
+   labs(y=trtNam[1])
> ggsave(pdfFlNam, width=8, height=10, units="in", device="pdf", useDingbats=F)
> cat("\\\\includegraphics{" , pdfFlNam, "}\\n\\n", sep="")
```

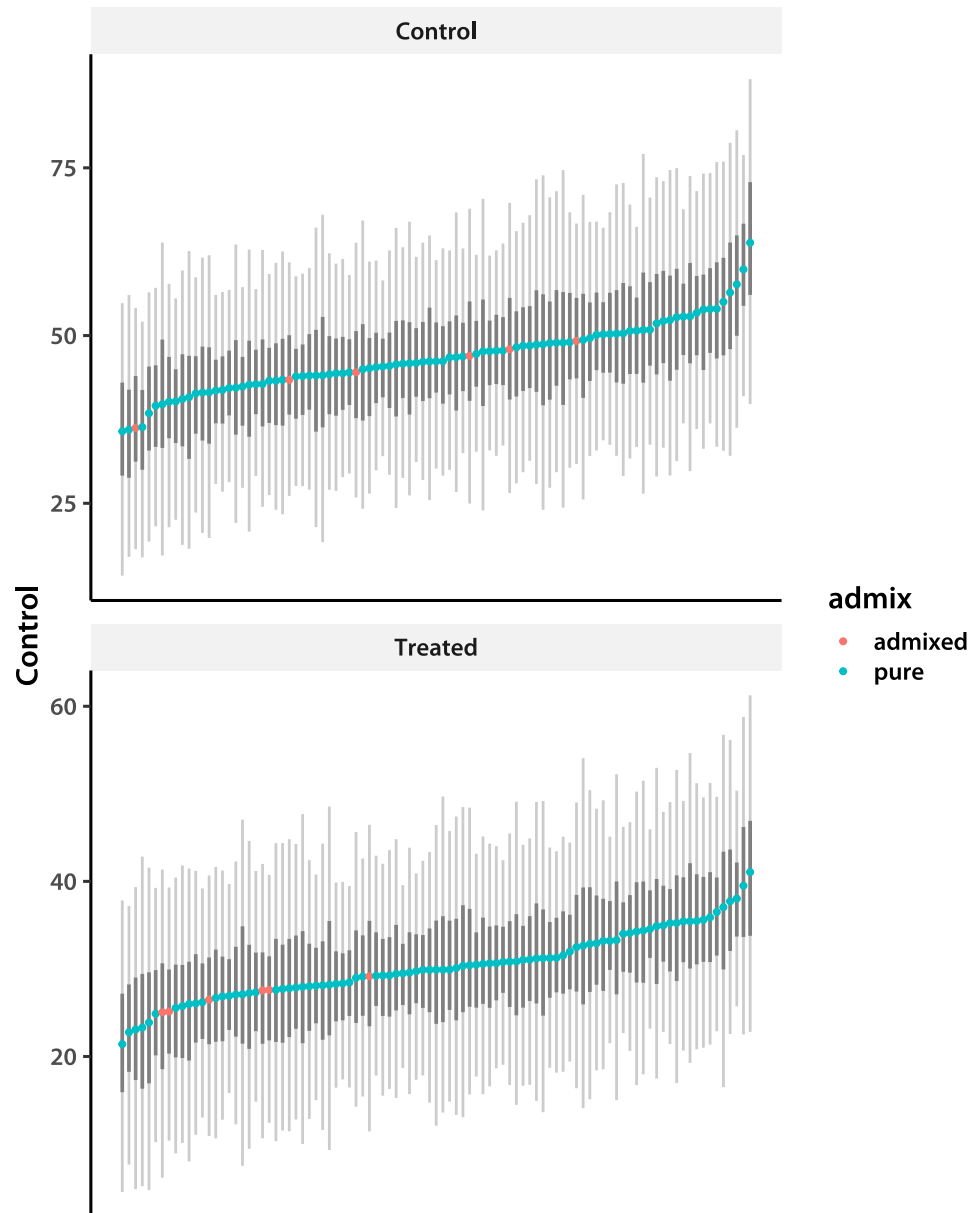

The effect is similar to the accession means, but seems more pronounced. Plot the ranks as before.

```
> pdfFlNam      <- "rankAdmGEBV.pdf"
> rankChn       <- t(apply(chn, 1, mnRank, admInd))
> rankBVTRJ     <- as.data.frame(t(apply(rankChn, 2, quantileLike)))
> rankBVTRJ$trait <- trtNam
> showtext_auto()
> ggplot(data=rankBVTRJ, aes(x=1:d,y=mode)) +
+   geom_segment(aes(x=1:d, y=lower95, xend=1:d, yend=upper95),
+   color="grey80", size=1.25) +
```

```

+   geom_segment(aes(x=1:d, y=lower50, xend=1:d, yend=upper50),
+     color="grey50", size=2) +
+   geom_point() +
+   geom_hline(yintercept=(mean(1:Nacc)), color="grey50") +
+   theme_classic(base_size=18, base_family="myriad") +
+   theme(axis.title.x=element_blank(), axis.text.x=element_blank(),
+     strip.background=element_rect(fill="grey95", linetype="blank"),
+     axis.ticks.x=element_blank()) +
+   labs(y="rank") + xlim(0.5, d+0.5) +
+   annotate("text", label="Control", x=1, y=min(rankMnTRJ$lower95)-2) +
+   annotate("text", label="AI treated", x=2, y=min(rankMnTRJ$lower95)-2)
> ggsave(pdfFlNam, width=8, height=8, units="in", device="pdf", useDingbats=F)
> cat("\\includegraphics{" , pdfFlNam, "}" , sep="")

```

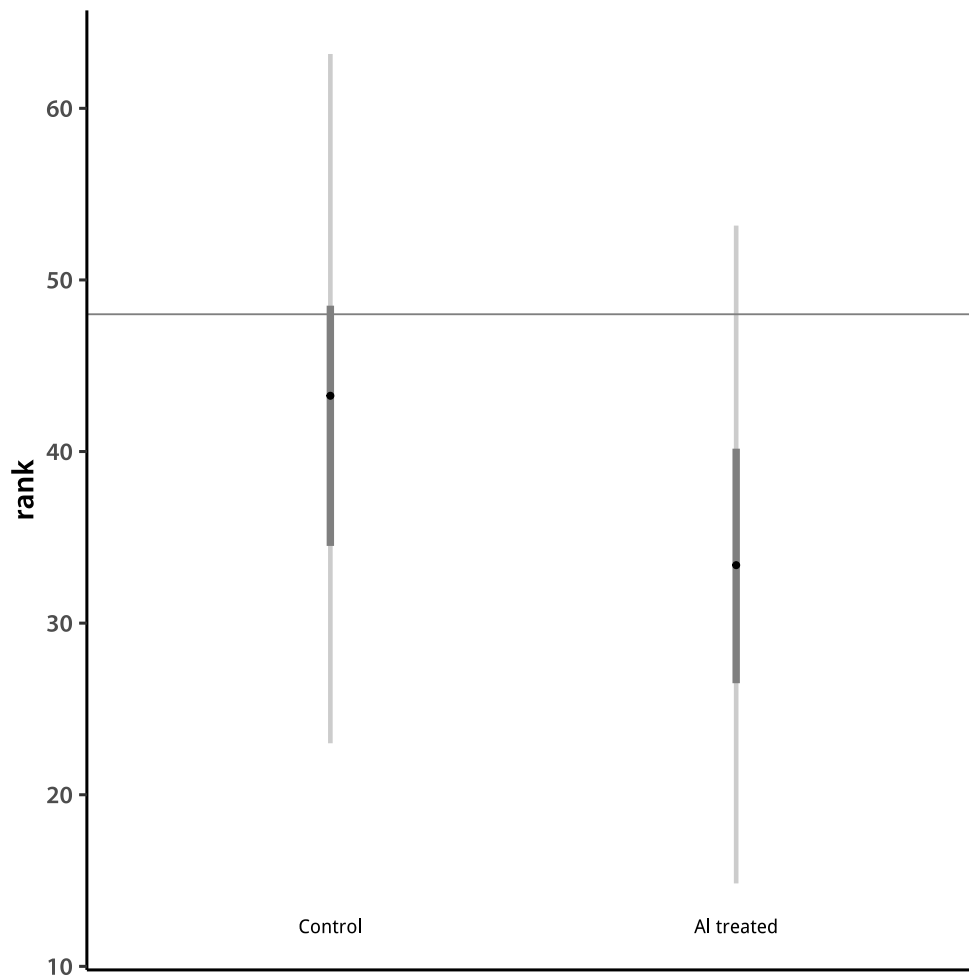

Numerical values:

```
> rankBVTRJ
```

|   | lower95  | lower50 | mode     | upper50  | upper95  | trait   |
|---|----------|---------|----------|----------|----------|---------|
| 1 | 23.00000 | 34.5    | 43.25091 | 48.50000 | 63.16667 | Control |
| 2 | 14.83333 | 26.5    | 33.37917 | 40.16667 | 53.16667 | Treated |

## 5 Heritabilities

Finally, I directly compare heritabilities between control and treated, as well as between populations. The background genetic and residual variances are taken from the respective covariance matrices. However, because we used a Student-*t* genetic model, the additive variance is estimated from the GEBV values rather  $\Sigma_a$ .

I first define the functions I need.

```
> makeVar <- cmpfun(function(vec){
+   apply(matrix(vec, ncol=d, byrow=T), 2, var)
+ })
> get.hsq <- cmpfun(function(vec){
+   vec[1:d]/rowSums(matrix(vec, nrow = d))
+ })
```

The function `get.hsq` calculates the marker heritability, which is a kind of narrow-sense heritability. It is

$$h^2 = \frac{\sigma_{\text{GEBV}}^2}{\sigma_{\text{GEBV}}^2 + \sigma_s^2 + \sigma_e^2}$$

for each treatment.

I read in the covariance matrices and extract variances (diagonal elements).

```
> diagInd <- diag(matrix(1:(d^2), ncol = d, byrow = T))
> chn1 <- matrix(.C("GSLmatLoad",
+   "chains/SgEout_aus_3_1.gbin",
+   as.integer(chnLen), as.integer(d^2), out = double(chnLen*d^2))$out,
+   nrow = chnLen, byrow = T)[,diagInd]
> chn1 <- cbind(chn1,
+   matrix(.C("GSLmatLoad",
+   "chains/SgSout_aus_3_1.gbin",
+   as.integer(chnLen), as.integer(d^2), out = double(chnLen*d^2))$out,
+   nrow = chnLen, byrow = T)[,diagInd])
> chn2 <- matrix(.C("GSLmatLoad",
+   "chains/SgEout_aus_3_2.gbin",
+   as.integer(chnLen), as.integer(d^2), out = double(chnLen*d^2))$out,
+   nrow = chnLen, byrow = T)[,diagInd]
> chn2 <- cbind(chn2,
+   matrix(.C("GSLmatLoad",
+   "chains/SgSout_aus_3_2.gbin",
+   as.integer(chnLen), as.integer(d^2), out = double(chnLen*d^2))$out,
```

```
+      nrow = chnLen, byrow = T)[,diagInd])
> chn3 <- matrix(.C("GSLmatLoad",
+ "chains/SgEout_aus_3_3.gbin",
+ as.integer(chnLen), as.integer(d^2), out = double(chnLen*d^2))$out,
+      nrow = chnLen, byrow = T)[,diagInd]
> chn3 <- cbind(chn3,
+ matrix(.C("GSLmatLoad",
+ "chains/SgSout_aus_3_3.gbin",
+ as.integer(chnLen), as.integer(d^2), out = double(chnLen*d^2))$out,
+      nrow = chnLen, byrow = T)[,diagInd])
> chn4 <- matrix(.C("GSLmatLoad",
+ "chains/SgEout_aus_3_4.gbin",
+ as.integer(chnLen), as.integer(d^2), out = double(chnLen*d^2))$out,
+      nrow = chnLen, byrow = T)[,diagInd]
> chn4 <- cbind(chn4,
+ matrix(.C("GSLmatLoad",
+ "chains/SgSout_aus_3_4.gbin",
+ as.integer(chnLen), as.integer(d^2), out = double(chnLen*d^2))$out,
+      nrow = chnLen, byrow = T)[,diagInd])
> chn5 <- matrix(.C("GSLmatLoad",
+ "chains/SgEout_aus_3_5.gbin",
+ as.integer(chnLen), as.integer(d^2), out = double(chnLen*d^2))$out,
+      nrow = chnLen, byrow = T)[,diagInd]
> chn5 <- cbind(chn5,
+ matrix(.C("GSLmatLoad",
+ "chains/SgSout_aus_3_5.gbin",
+ as.integer(chnLen), as.integer(d^2), out = double(chnLen*d^2))$out,
+      nrow = chnLen, byrow = T)[,diagInd])
> sigChnAUS <- rbind(chn1, chn2, chn3, chn4, chn5)
> sigChnAUS <- cbind(t(apply(gebvChnAUS, 1, makeVar)), sigChnAUS)
> chnhsqAUS <- t(apply(sigChnAUS, 1, get.hsq))
> chn1 <- matrix(.C("GSLmatLoad",
+ "chains/SgEout_trj_3_1.gbin",
+ as.integer(chnLen), as.integer(d^2), out = double(chnLen*d^2))$out,
+      nrow = chnLen, byrow = T)[,diagInd]
> chn1 <- cbind(chn1,
+ matrix(.C("GSLmatLoad",
+ "chains/SgSout_trj_3_1.gbin",
+ as.integer(chnLen), as.integer(d^2), out = double(chnLen*d^2))$out,
+      nrow = chnLen, byrow = T)[,diagInd])
> chn2 <- matrix(.C("GSLmatLoad",
+ "chains/SgEout_trj_3_2.gbin",
+ as.integer(chnLen), as.integer(d^2), out = double(chnLen*d^2))$out,
+      nrow = chnLen, byrow = T)[,diagInd]
> chn2 <- cbind(chn2,
```

```
+   matrix(.C("GSLmatLoad",
+   "chains/SgSout_trj_3_2.gbin",
+   as.integer(chnLen), as.integer(d^2), out = double(chnLen*d^2))$out,
+   nrow = chnLen, byrow = T)[,diagInd])
> chn3 <- matrix(.C("GSLmatLoad",
+   "chains/SgEout_trj_3_3.gbin",
+   as.integer(chnLen), as.integer(d^2), out = double(chnLen*d^2))$out,
+   nrow = chnLen, byrow = T)[,diagInd])
> chn3 <- cbind(chn3,
+   matrix(.C("GSLmatLoad",
+   "chains/SgSout_trj_3_3.gbin",
+   as.integer(chnLen), as.integer(d^2), out = double(chnLen*d^2))$out,
+   nrow = chnLen, byrow = T)[,diagInd])
> chn4 <- matrix(.C("GSLmatLoad",
+   "chains/SgEout_trj_3_4.gbin",
+   as.integer(chnLen), as.integer(d^2), out = double(chnLen*d^2))$out,
+   nrow = chnLen, byrow = T)[,diagInd])
> chn4 <- cbind(chn4,
+   matrix(.C("GSLmatLoad",
+   "chains/SgSout_trj_3_4.gbin",
+   as.integer(chnLen), as.integer(d^2), out = double(chnLen*d^2))$out,
+   nrow = chnLen, byrow = T)[,diagInd])
> chn5 <- matrix(.C("GSLmatLoad",
+   "chains/SgEout_trj_3_5.gbin",
+   as.integer(chnLen), as.integer(d^2), out = double(chnLen*d^2))$out,
+   nrow = chnLen, byrow = T)[,diagInd])
> chn5 <- cbind(chn5,
+   matrix(.C("GSLmatLoad",
+   "chains/SgSout_trj_3_5.gbin",
+   as.integer(chnLen), as.integer(d^2), out = double(chnLen*d^2))$out,
+   nrow = chnLen, byrow = T)[,diagInd])
> sigChnTRJ <- rbind(chn1, chn2, chn3, chn4, chn5)
> sigChnTRJ <- cbind(t(apply(gebvChnTRJ, 1, makeVar)), sigChnTRJ)
> chnhsqTRJ <- t(apply(sigChnTRJ, 1, get.hsq))
> chn1 <- matrix(.C("GSLmatLoad",
+   "chains/SgEout_trja_3_1.gbin",
+   as.integer(chnLen), as.integer(d^2), out = double(chnLen*d^2))$out,
+   nrow = chnLen, byrow = T)[,diagInd])
> chn1 <- cbind(chn1,
+   matrix(.C("GSLmatLoad",
+   "chains/SgSout_trja_3_1.gbin",
+   as.integer(chnLen), as.integer(d^2), out = double(chnLen*d^2))$out,
+   nrow = chnLen, byrow = T)[,diagInd])
> chn2 <- matrix(.C("GSLmatLoad",
+   "chains/SgEout_trja_3_2.gbin",
```

```

+   as.integer(chnLen), as.integer(d^2), out = double(chnLen*d^2))$out,
+   nrow = chnLen, byrow = T)[,diagInd]
> chn2 <- cbind(chn2,
+   matrix(.C("GSLmatLoad",
+   "chains/SgSout_trja_3_2.gbin",
+   as.integer(chnLen), as.integer(d^2), out = double(chnLen*d^2))$out,
+   nrow = chnLen, byrow = T)[,diagInd])
> chn3 <- matrix(.C("GSLmatLoad",
+   "chains/SgEout_trja_3_3.gbin",
+   as.integer(chnLen), as.integer(d^2), out = double(chnLen*d^2))$out,
+   nrow = chnLen, byrow = T)[,diagInd]
> chn3 <- cbind(chn3,
+   matrix(.C("GSLmatLoad",
+   "chains/SgSout_trja_3_3.gbin",
+   as.integer(chnLen), as.integer(d^2), out = double(chnLen*d^2))$out,
+   nrow = chnLen, byrow = T)[,diagInd])
> chn4 <- matrix(.C("GSLmatLoad",
+   "chains/SgEout_trja_3_4.gbin",
+   as.integer(chnLen), as.integer(d^2), out = double(chnLen*d^2))$out,
+   nrow = chnLen, byrow = T)[,diagInd]
> chn4 <- cbind(chn4,
+   matrix(.C("GSLmatLoad",
+   "chains/SgSout_trja_3_4.gbin",
+   as.integer(chnLen), as.integer(d^2), out = double(chnLen*d^2))$out,
+   nrow = chnLen, byrow = T)[,diagInd])
> chn5 <- matrix(.C("GSLmatLoad",
+   "chains/SgEout_trja_3_5.gbin",
+   as.integer(chnLen), as.integer(d^2), out = double(chnLen*d^2))$out,
+   nrow = chnLen, byrow = T)[,diagInd]
> chn5 <- cbind(chn5,
+   matrix(.C("GSLmatLoad",
+   "chains/SgSout_trja_3_5.gbin",
+   as.integer(chnLen), as.integer(d^2), out = double(chnLen*d^2))$out,
+   nrow = chnLen, byrow = T)[,diagInd])
> sigChnTRJA <- rbind(chn1, chn2, chn3, chn4, chn5)
> sigChnTRJA <- cbind(t(apply(gebvChnTRJA, 1, makeVar)), sigChnTRJA)
> chnhsqTRJA <- t(apply(sigChnTRJA, 1, get.hsqr))
> Npop <- 3
> hsqrHPD <- as.data.frame(rbind(t(apply(chnhsqAUS, 2, quantileLike)),
+   t(apply(chnhsqTRJ, 2, quantileLike)),
+   t(apply(chnhsqTRJA, 2, quantileLike))))
> hsqrHPD$treatment <- rep(trtNam, Npop)
> hsqrHPD$population <- rep(c("AUS", "TRJ", "TRJA"), each=d)
>

```

Plot the results.

```
> pdfFlNam <- "hSqFAMall.pdf"
> showtext_auto()
> ggplot(data=hsqHPD, aes(x=c(1,2,4,5,7,8), y=mode, color=population)) +
+   geom_segment(aes(x=c(1,2,4,5,7,8), y=lower95, xend=c(1,2,4,5,7,8),
+     yend=upper95, color=population),
+     size=1.2) +
+   geom_segment(aes(x=c(1,2,4,5,7,8), y=lower50, xend=c(1,2,4,5,7,8),
+     yend=upper50, color=population),
+     size=1.75) +
+   geom_point(size=2) +
+   theme_classic(base_size=18, base_family="myriad") +
+   scale_x_continuous(breaks=c(1,2,4,5,7,8), labels=rep(trtNam, Npop)) +
+   ylim(c(0,1)) +
+   labs(y=expression(italic(h)^2), x="treatment")
> ggsave(pdfFlNam, width=8, height=8, units="in", device="pdf", useDingbats=F)
> cat("\\includegraphics{" , pdfFlNam, "}" , sep="")
```

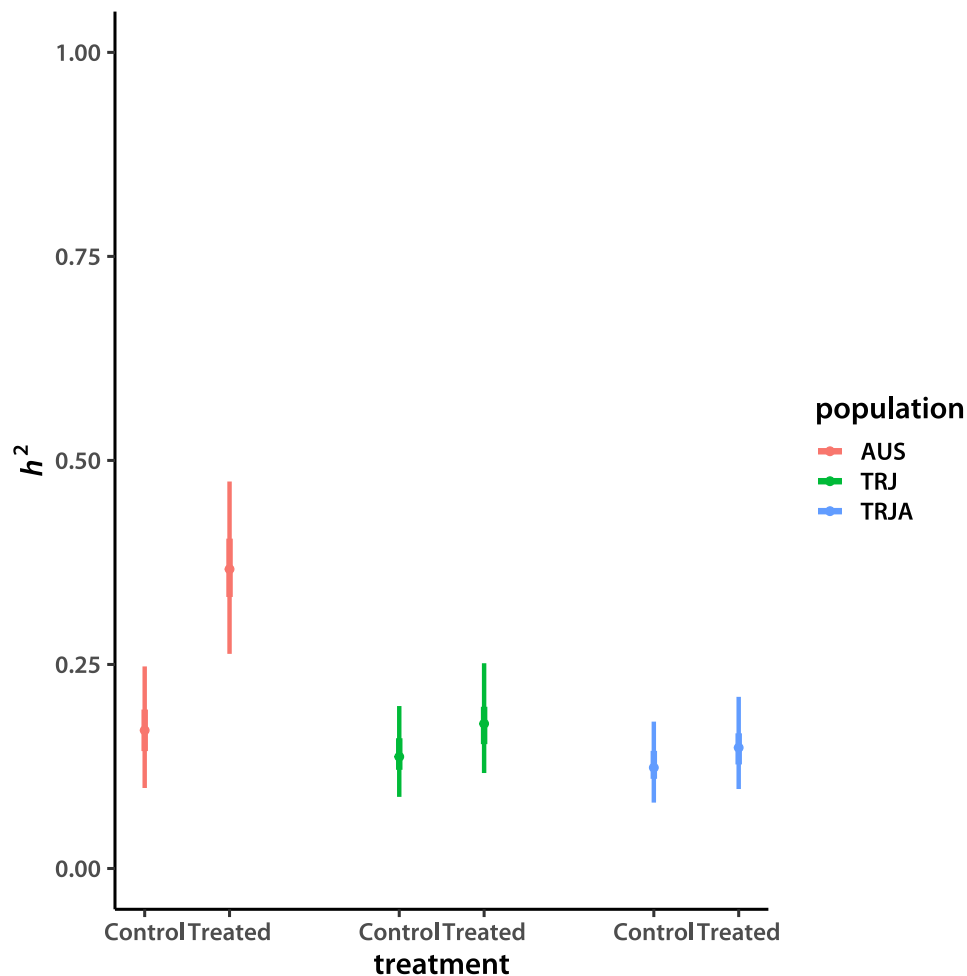

Repeat, including only the pure accessions.

```
> pdfFlNam <- "hSqFAMpure.pdf"
> showtext_auto()
> ggplot(data=subset(hsqHPD, population != "TRJA"), aes(x=c(1,2,4,5), y=mode, color=population)) +
+   geom_segment(aes(x=c(1,2,4,5), y=lower95, xend=c(1,2,4,5),
+     yend=upper95, color=population),
+     size=1.2) +
+   geom_segment(aes(x=c(1,2,4,5), y=lower50, xend=c(1,2,4,5),
+     yend=upper50, color=population),
+     size=1.75) +
+   geom_point(size=2) +
+   theme_classic(base_size=18, base_family="myriad") +
+   scale_x_continuous(breaks=c(1,2,4,5), labels=rep(trtNam, Npop-1)) +
+   ylim(c(0,1)) +
+   labs(y=expression(italic(h)^2), x="treatment")
> ggsave(pdfFlNam, width=8, height=8, units="in", device="pdf", useDingbats=F)
```

```
> cat("\\includegraphics{", pdfFlNam, "}\n\n", sep="")
```

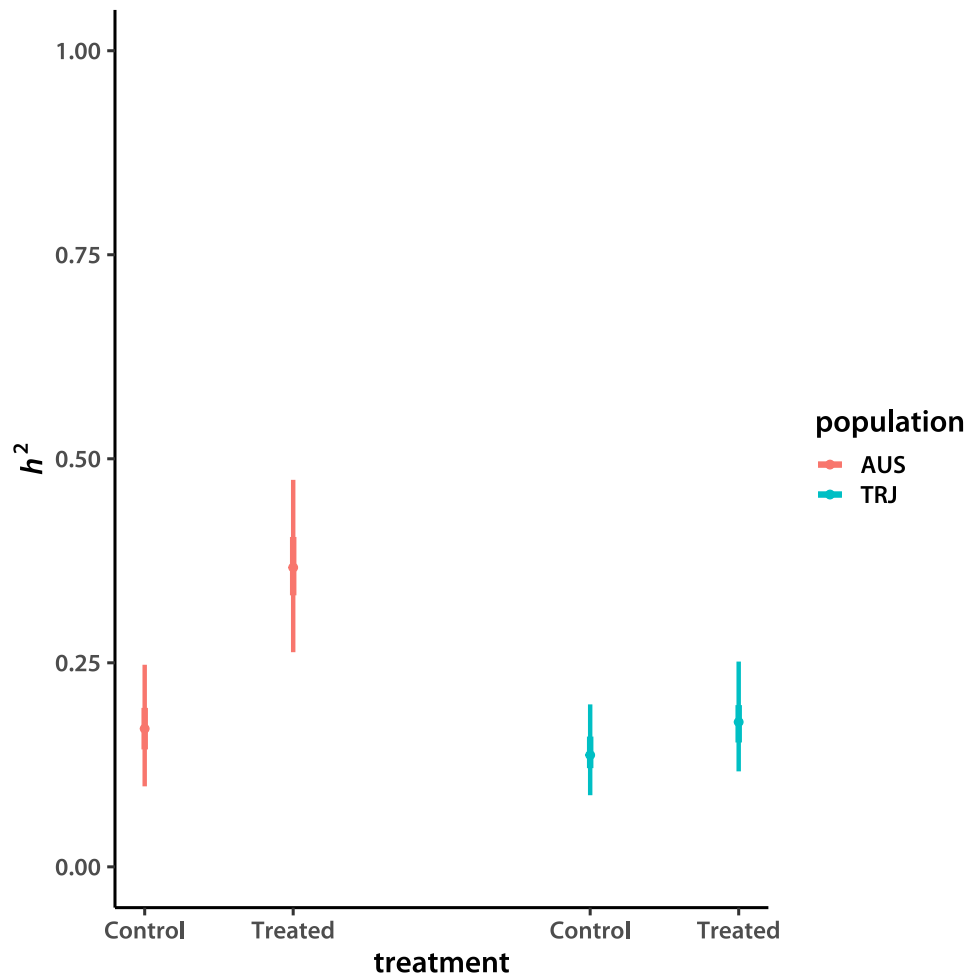

Now I plot broad-sense (among-accession) heritability:

$$H^2 = \frac{\sigma_{\text{GEBV}}^2 + \sigma_s^2}{\sigma_{\text{GEBV}}^2 + \sigma_s^2 + \sigma_e^2}$$

I am also interested in the contribution of the non-additive effects alone, excluding the marker influence:

$$FVE_s = \frac{\sigma_s^2}{\sigma_{\text{GEBV}}^2 + \sigma_s^2 + \sigma_e^2}$$

```
> get.Hsq <- cmpfun(function(vec){
+   (vec[1:d] + vec[(2*d+1):(3*d)])/rowSums(matrix(vec, nrow = d))
+ })
> get.fve <- cmpfun(function(vec){
+   (vec[(2*d+1):(3*d)])/rowSums(matrix(vec, nrow = d))
```

```

+ })
> chnHsqAUS <- t(apply(sigChnAUS, 1, get.Hsq))
> chnHsqTRJ <- t(apply(sigChnTRJ, 1, get.Hsq))
> chnHsqTRJA <- t(apply(sigChnTRJA, 1, get.Hsq))
> chnFveAUS <- t(apply(sigChnAUS, 1, get.fve))
> chnFveTRJ <- t(apply(sigChnTRJ, 1, get.fve))
> chnFveTRJA <- t(apply(sigChnTRJA, 1, get.fve))
> HsqHPD <- as.data.frame(rbind(t(apply(chnHsqAUS, 2, quantileLike)),
+   t(apply(chnHsqTRJ, 2, quantileLike)),
+   t(apply(chnHsqTRJA, 2, quantileLike))))
> HsqHPD$treatment <- rep(trtNam, Npop)
> HsqHPD$population <- rep(c("AUS", "TRJ", "TRJA"), each=d)
> fveHPD <- as.data.frame(rbind(t(apply(chnHsqAUS, 2, quantileLike)),
+   t(apply(chnHsqTRJ, 2, quantileLike)),
+   t(apply(chnFveAUS, 2, quantileLike)),
+   t(apply(chnFveTRJ, 2, quantileLike))))
> fveHPD$treatment <- rep(trtNam, 2*(Npop-1))
> fveHPD$population <- rep(rep(c("AUS", "TRJ"), each=2), d)
> fveHPD$kind <- factor(rep(c("Marker", "Background"), each=d*(Npop-1)),
+   levels=c("Marker", "Background"))

```

Plot the results.

```

> pdfFlNam <- "HsqFAMall.pdf"
> showtext_auto()
> ggplot(data=HsqHPD, aes(x=c(1,2,4,5,7,8), y=mode, color=population)) +
+   geom_segment(aes(x=c(1,2,4,5,7,8), y=lower95, xend=c(1,2,4,5,7,8),
+     yend=upper95, color=population),
+     size=1.2) +
+   geom_segment(aes(x=c(1,2,4,5,7,8), y=lower50, xend=c(1,2,4,5,7,8),
+     yend=upper50, color=population),
+     size=1.75) +
+   geom_point(size=2) +
+   theme_classic(base_size=18, base_family="myriad") +
+   scale_x_continuous(breaks=c(1,2,4,5,7,8), labels=rep(trtNam, Npop)) +
+   ylim(c(0,1)) +
+   labs(y=expression(italic(H)^2), x="treatment")
> ggsave(pdfFlNam, width=8, height=8, units="in", device="pdf", useDingbats=F)
> cat("\\\\includegraphics{" , pdfFlNam, "}\\n\\n", sep="")

```

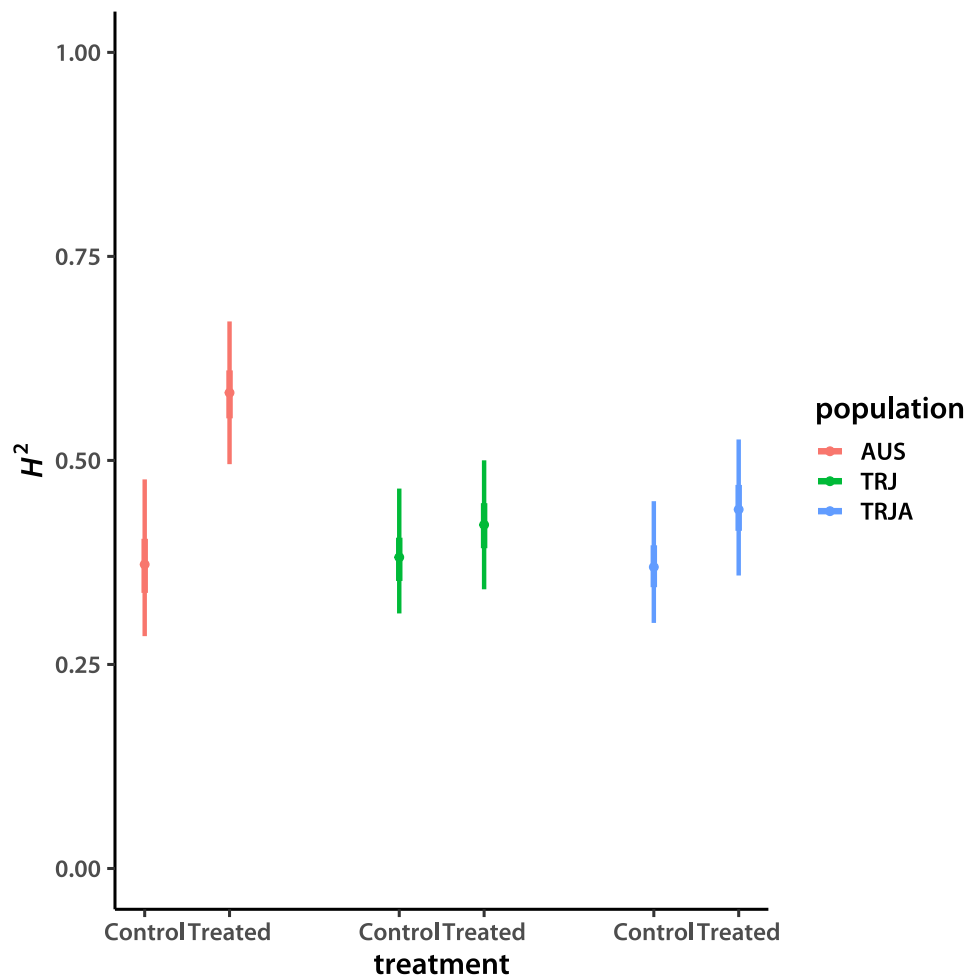

Repeat, including only the pure accessions.

```
> pdfFlNam <- "HsqFAMpure.pdf"
> showtext_auto()
> ggplot(data=subset(HsqHPD, population != "TRJA"), aes(x=c(1,2,4,5), y=mode, color=population)) +
+   geom_segment(aes(x=c(1,2,4,5), y=lower95, xend=c(1,2,4,5),
+     yend=upper95, color=population),
+     size=1.2) +
+   geom_segment(aes(x=c(1,2,4,5), y=lower50, xend=c(1,2,4,5),
+     yend=upper50, color=population),
+     size=1.75) +
+   geom_point(size=2) +
+   theme_classic(base_size=18, base_family="myriad") +
+   scale_x_continuous(breaks=c(1,2,4,5), labels=rep(trtNam, Npop-1)) +
+   ylim(c(0,1)) +
+   labs(y=expression(italic(H)^2), x="treatment")
> ggsave(pdfFlNam, width=8, height=8, units="in", device="pdf", useDingbats=F)
```

```
> cat("\\includegraphics{", pdfFlNam, "}\n\n", sep="")
```

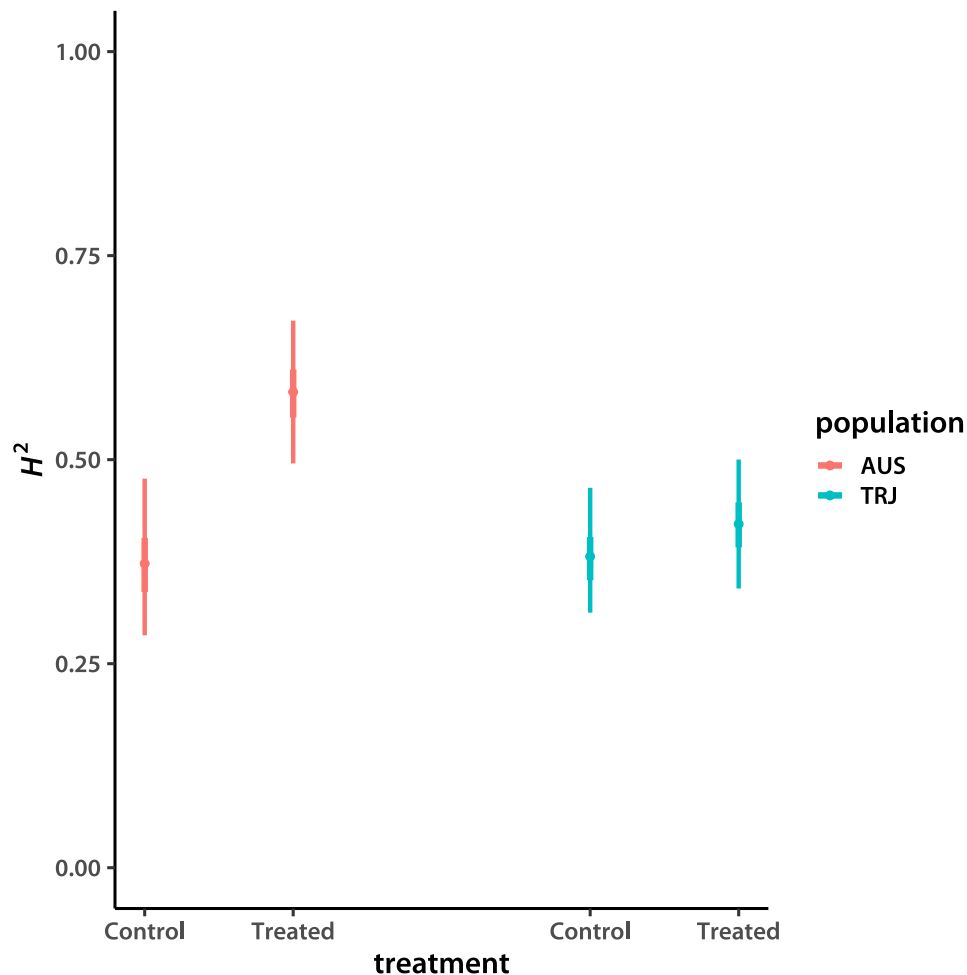

I plot the fractions of variance explained side by side.

```
> pdfFlNam <- "fveFAMpure.pdf"
> showtext_auto()
> ggplot(data=fveHPD, aes(x=rep(1:4,2), y=mode, color=population)) +
+   geom_segment(aes(x=rep(1:4,2), y=lower95, xend=rep(1:4,2),
+     yend=upper95, color=population),
+     size=1.2) +
+   geom_segment(aes(x=rep(1:4,2), y=lower50, xend=rep(1:4,2),
+     yend=upper50, color=population),
+     size=1.75) +
+   geom_point(size=2) +
+   facet_wrap(~kind, scales="free_x", ncol=2) +
+   theme_classic(base_size=18, base_family="myriad") +
+   scale_x_continuous(breaks=rep(1:4,2), labels=rep(trtNam, d*(Npop-1))) +
```

```

+   theme(axis.text.x=element_text(angle=45, hjust=1.0, vjust=1.0),
+         strip.background=element_rect(fill="grey95", linetype="blank"),
+         panel.spacing.x=unit(4.0, "lines")) +
+   ylim(c(0,1)) +
+   labs(y="fraction of variance", x="treatment")
> gggsave(pdfFlNam, width=10, height=8, units="in", device="pdf", useDingbats=F)
> cat("\\includegraphics{" , pdfFlNam, "}\\n\\n", sep="")

```

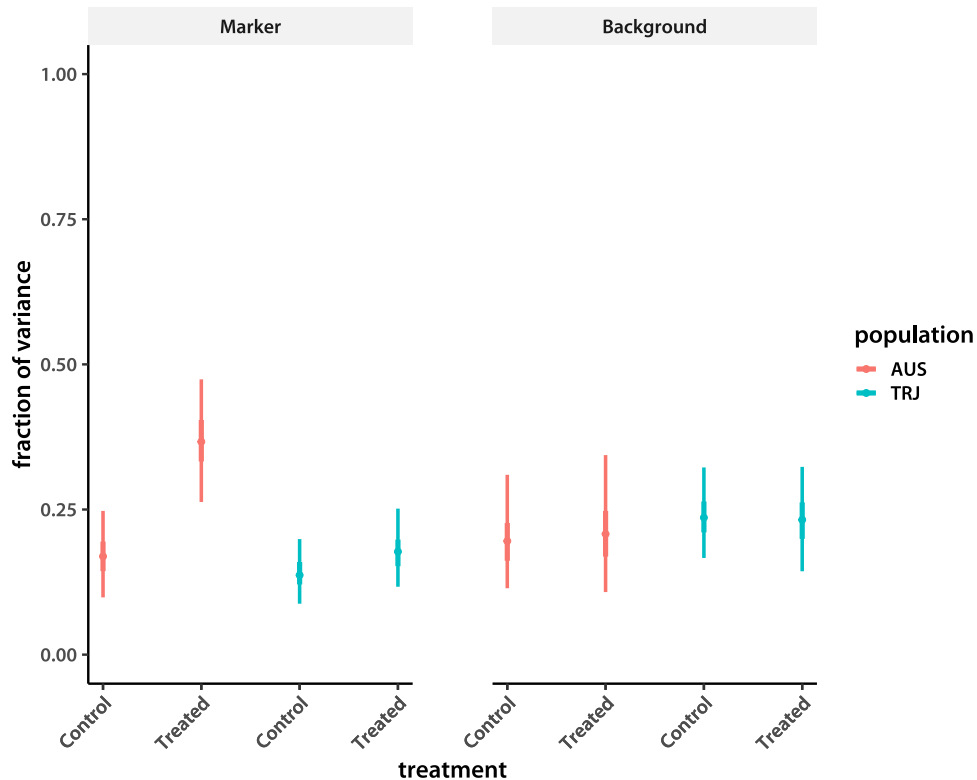

Finally, put the plots together for direct comparison.

```

> ggGEBV <- ggplot(data=hsqHPD, aes(x=c(1,2,4,5,7,8), y=mode, color=population)) +
+   geom_segment(aes(x=c(1,2,4,5,7,8), y=lower95, xend=c(1,2,4,5,7,8),
+     yend=upper95, color=population),
+     size=1.2) +
+   geom_segment(aes(x=c(1,2,4,5,7,8), y=lower50, xend=c(1,2,4,5,7,8),
+     yend=upper50, color=population),
+     size=1.75) +
+   geom_point(size=2) +
+   theme_classic(base_size=18, base_family="myriad") +
+   scale_x_continuous(breaks=c(1,2,4,5,7,8), labels=rep(trtNam, Npop)) +
+   theme(axis.text.x=element_text(angle=45, hjust=1.0, vjust=1.0)) +
+   ylim(c(0,1)) +
+   labs(y=expression(italic(h)^2), x="treatment")

```

```

> ggHsq <- ggplot(data=HsqHPD, aes(x=c(1,2,4,5,7,8), y=mode, color=population)) +
+   geom_segment(aes(x=c(1,2,4,5,7,8), y=lower95, xend=c(1,2,4,5,7,8),
+     yend=upper95, color=population),
+     size=1.2) +
+   geom_segment(aes(x=c(1,2,4,5,7,8), y=lower50, xend=c(1,2,4,5,7,8),
+     yend=upper50, color=population),
+     size=1.75) +
+   geom_point(size=2) +
+   theme_classic(base_size=18, base_family="myriad") +
+   scale_x_continuous(breaks=c(1,2,4,5,7,8), labels=rep(trtNam, Npop)) +
+   theme(axis.text.x=element_text(angle=45, hjust=1.0, vjust=1.0)) +
+   ylim(c(0,1)) +
+   labs(y=expression(italic(H)^2), x="treatment")
> showtext_auto()
> grid.arrange(ggGEBV, ggHsq, ncol = 2)
>

```

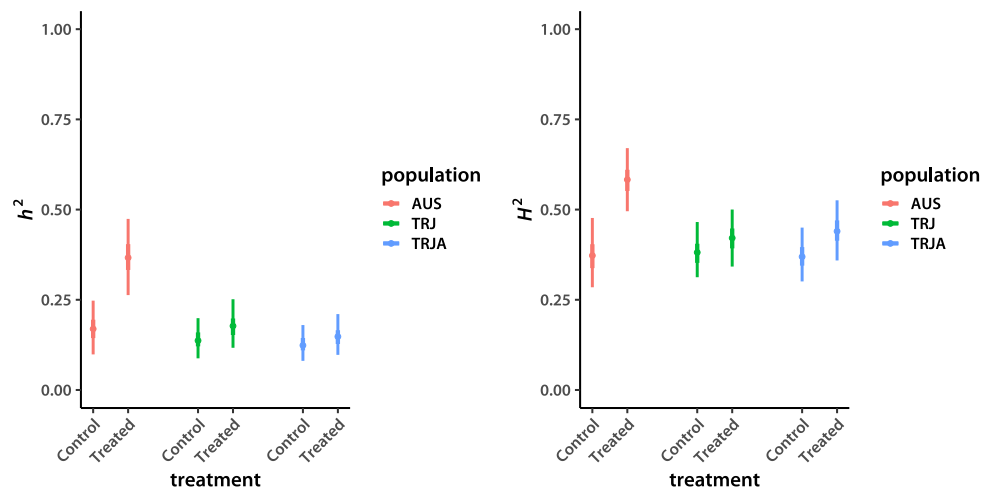

Supplement: Supplementary file 4 [file 1]
