# Supplementary material
Source: publisher figshare collection journal article supplement (https://gsajournals.figshare.com/articles/dataset/_/10321538)

# MCMC convergence analyses

Tony Greenberg

May 4, 2018

```
R version 3.4.2 (2017-09-28)
```

```
Platform: x86_64-apple-darwin17.2.0 (64-bit)
```

```
Running under: macOS High Sierra 10.13.4
```

```
Matrix products: default
```

```
BLAS: /System/Library/Frameworks/Accelerate.framework/Versions/A/Frameworks/vecLib.framework/Versions/A
```

```
LAPACK: /Library/Frameworks/R.framework/Versions/3.4/Resources/lib/libRlapack.dylib
```

```
locale:
```

```
[1] en_US.UTF-8/en_US.UTF-8/en_US.UTF-8/C/en_US.UTF-8/en_US.UTF-8
```

```
attached base packages:
```

```
[1] compiler stats graphics grDevices utils methods base
```

```
other attached packages:
```

```
[1] showtext_0.5 showtextdb_2.0 sysfonts_0.7.1 gridExtra_2.3 ggplot2_2.2.1
```

```
[6] lattice_0.20-35
```

```
loaded via a namespace (and not attached):
```

```
[1] Rcpp_0.12.13 digest_0.6.12 grid_3.4.2 plyr_1.8.4 gtable_0.2.0
```

```
[6] scales_0.5.0 rlang_0.1.4 lazyeval_0.2.1 labeling_0.3 tools_3.4.2
```

```
[11] munsell_0.4.3 colorspace_1.3-2 tibble_1.3.4
```

In this document I examine convergence of Markov chains generated for the AI tolerance project on the old multipopulation data set. I start by looking at the experiment ID regression coefficients, first in analyses using *aus* accessions, then using tropical *japonica* lines.

The chain files are in the binary format generated by saving GSL matrices. R functions to read these files are available from the **MuGen** GitHub page.

I first define a function that calculates the Gelman-Rubin convergence statistic for multiple MCMC chains.

```
> gelRub <- cmpfun(function(vrNam, nChn, chnLen){
+   mat <- NULL
+   for (i in 1:nChn){
+     mat <- rbind(mat, eval(as.symbol(paste(vrNam, i, sep=""))))
+   }
+   chnFac <- factor(rep(1:nChn, each=chnLen))
+   W <- colMeans(apply(mat, 2, tapply, chnFac, var))
```

```
+   B <- apply(apply(mat, 2, tapply, chnFac, mean), 2, var)
+   return( sqrt((((chnLen - 1)/chnLen)*W + B)/W) )
+ })
>
```

I am also interested in the quality of chain mixing. I use autocorrelations to test for that. The following function examines autocorrelations for each chain for a given variable and reports the chain with the highest mean value. The autocorrelations are calculated using default parameters of the `acf()` function from the `stats` R package.

```
> eachAcf <- cmpfun(function(i, nChn, vrNam){
+   tmp <- NULL
+   for (j in 1:nChn){
+     tmp <- cbind(tmp,
+       acf(eval(as.symbol(paste(vrNam, j, sep="")))[,i], plot = F)$acf
+     )
+   }
+   return(tmp[,which.max(colMeans(tmp[-1,]))])
+ })
> mcmcAcf <- cmpfun(function(vrNam, nChn){
+   # all chains should have the same dimensions, so take the first one
+   N <- ncol(eval(as.symbol(paste(vrNam, 1, sep=""))))
+   t(sapply(1:N, eachAcf, nChn, vrNam))
+ })
```

Read the chains.

```
> trtNam <- c("Control", "160uM_A1")
> d <- 2
> Nex <- 6
> expDim <- d*Nex
> nChn <- 5
> chnLen <- 2000
> chn1 <- matrix(.C("GSLmatLoad",
+   "chains/EXPout_aus_3_1.gbin",
+   as.integer(chnLen), as.integer(expDim), out = double(chnLen*expDim))$out,
+   nrow = chnLen, byrow = T)
> chn2 <- matrix(.C("GSLmatLoad",
+   "chains/EXPout_aus_3_2.gbin",
+   as.integer(chnLen), as.integer(expDim), out = double(chnLen*expDim))$out,
+   nrow = chnLen, byrow = T)
> chn3 <- matrix(.C("GSLmatLoad",
+   "chains/EXPout_aus_3_3.gbin",
+   as.integer(chnLen), as.integer(expDim), out = double(chnLen*expDim))$out,
+   nrow = chnLen, byrow = T)
> chn4 <- matrix(.C("GSLmatLoad",
+   "chains/EXPout_aus_3_4.gbin",
```

```
+   as.integer(chnLen), as.integer(expDim), out = double(chnLen*expDim))$out,
+   nrow = chnLen, byrow = T)
> chn5 <- matrix(.C("GSLmatLoad",
+   "chains/EXPout_aus_3_5.gbin",
+   as.integer(chnLen), as.integer(expDim), out = double(chnLen*expDim))$out,
+   nrow = chnLen, byrow = T)
> grMat   <- matrix(gelRub("chn", nChn, chnLen), ncol = d, byrow = T)
> grFrame <- data.frame(Gelman.Rubin=c(grMat), trait=rep(trtNam, each = Nexp))
> grMaxInd <- apply(grMat, 2, function(vec){which(vec == max(vec))[1]})
> acMat    <- mcmcAcf("chn", 5)
> acFrame  <- data.frame(autocorrelation=c(acMat), trait=rep(trtNam, prod(dim(acMat))/2),
+   lag=rep(0:33, each = nrow(acMat)))
>
```

Plot the *aus* results.

```
> showtext_auto()
> ggplot(data=grFrame,
+   aes(x=trait, y=Gelman.Rubin)) +
+   geom_boxplot(fill="grey80") +
+   theme_classic(base_size=18, base_family="myriad")
>
```

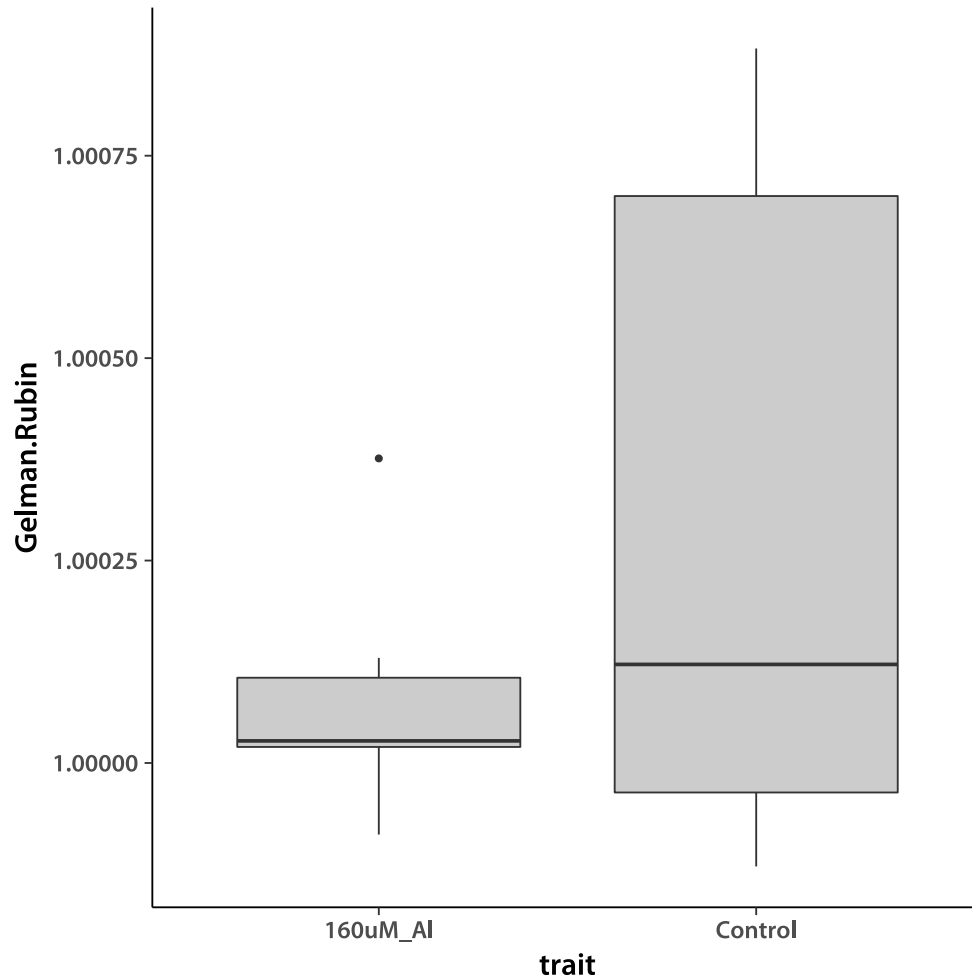

Values smaller than  $\sim 1.2$  indicate good convergence. I check by plotting an the chains with the worst G-R statistic for each trait.

```
> plotLocEx <- cmpfun(function(trt.i, samp.j, N){
+   i <- ( d*(samp.j-1) ) + trt.i
+   plot( chn1[,i], type = "l",
+     ylim = range(c(chn1[,i], chn2[,i], chn3[,i], chn4[,i], chn5[,i])),
+     col = "orange", ylab = trtNam[trt.i], xaxt = "n", las = 1)
+   lines(chn2[,i], col = "red")
+   lines(chn3[,i], col = "blue")
+   lines(chn4[,i], col = "green")
+   lines(chn5[,i], col = "magenta")
+ })
```

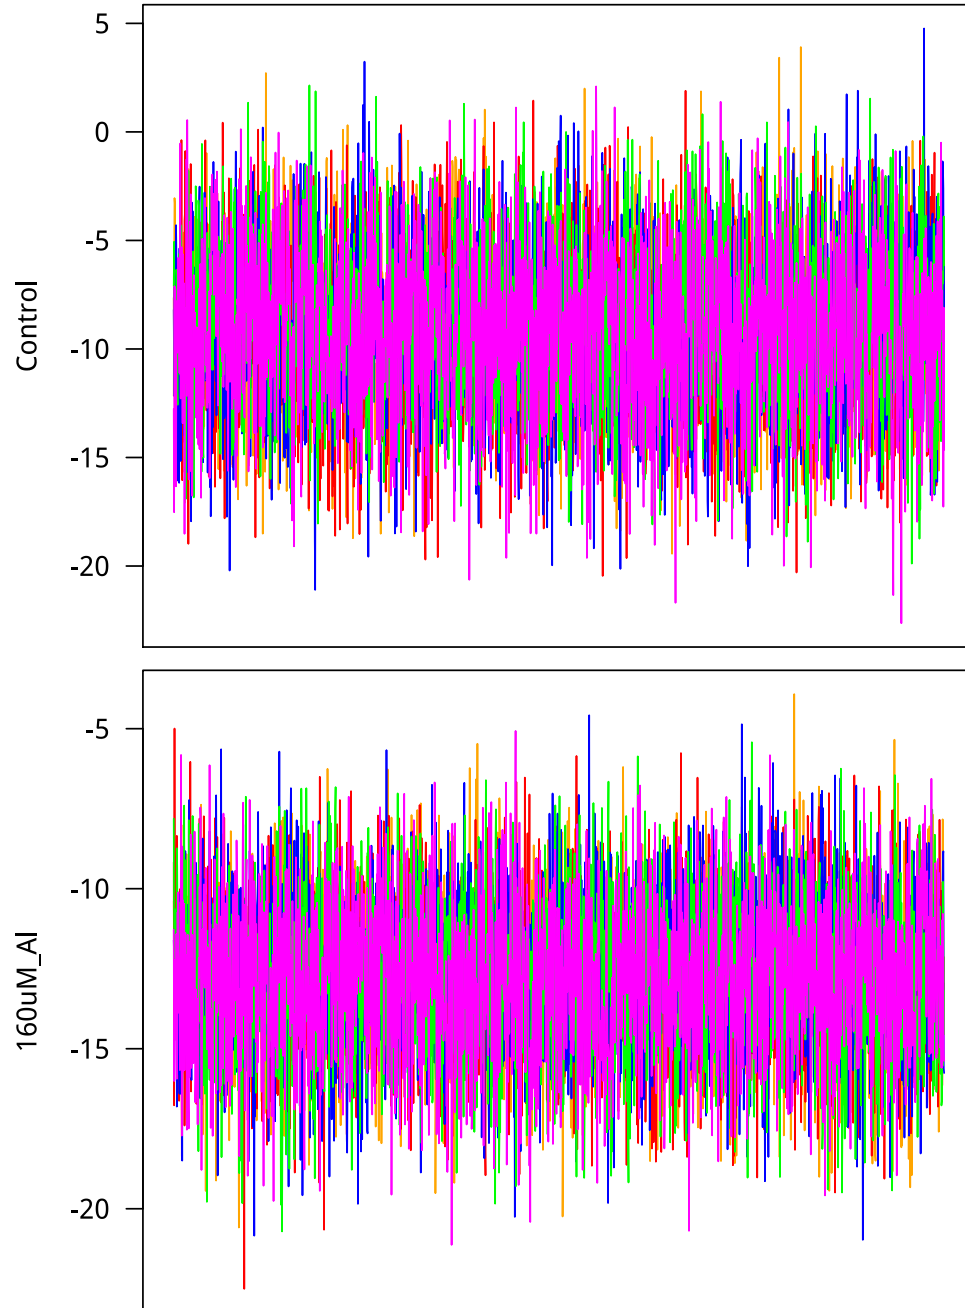

Now I look at mixing. Lag is on the  $x$  axis.

```
> ggTrt1 <- ggplot(data=subset(acFrame, trait==trtNam[1]),  
+   aes(x=lag, y=autocorrelation)) +  
+   geom_boxplot(fill="grey80", aes(group=cut_interval(lag, n=34))) +  
+   theme_classic(base_size=18, base_family="myriad") +  
+   labs(title=trtNam[1])  
> ggTrt2 <- ggplot(data=subset(acFrame, trait==trtNam[2]),
```

```

+       aes(x=lag, y=autocorrelation)) +
+       geom_boxplot(fill="grey80", aes(group=cut_interval(lag, n=34))) +
+       theme_classic(base_size=18, base_family="myriad") +
+       labs(title=trtNam[2])
> showtext_auto()
> grid.arrange(ggTrt1, ggTrt2, nrow = 2)
>

```

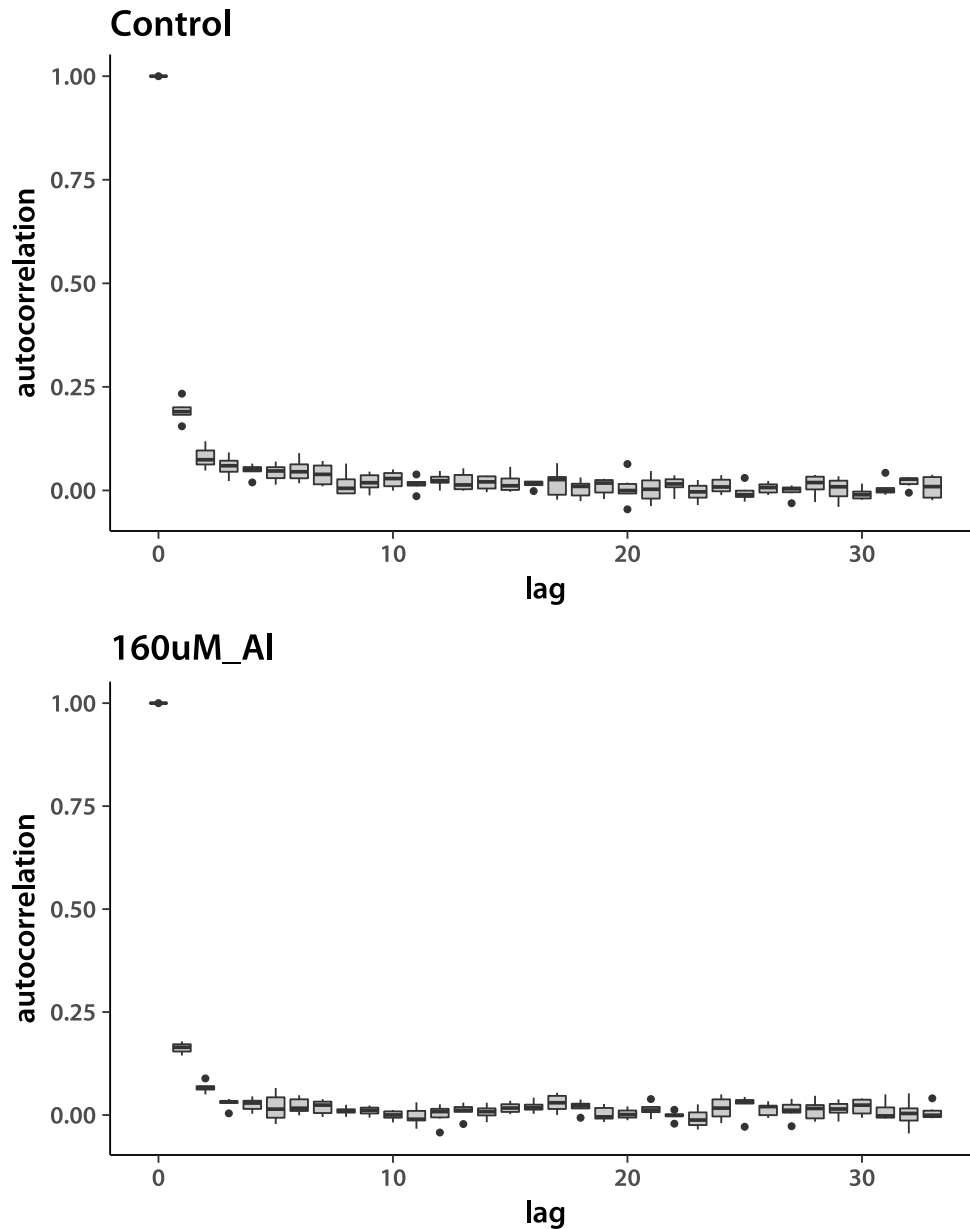

Now do the tropical *japonica* results.

```

> chn1 <- matrix(.C("GSLmatLoad",

```

```
+   "chains/EXPout_trj_3_1.gbin",
+   as.integer(chnLen), as.integer(expDim), out = double(chnLen*expDim))$out,
+   nrow = chnLen, byrow = T)
> chn2 <- matrix(.C("GSLmatLoad",
+   "chains/EXPout_trj_3_2.gbin",
+   as.integer(chnLen), as.integer(expDim), out = double(chnLen*expDim))$out,
+   nrow = chnLen, byrow = T)
> chn3 <- matrix(.C("GSLmatLoad",
+   "chains/EXPout_trj_3_3.gbin",
+   as.integer(chnLen), as.integer(expDim), out = double(chnLen*expDim))$out,
+   nrow = chnLen, byrow = T)
> chn4 <- matrix(.C("GSLmatLoad",
+   "chains/EXPout_trj_3_4.gbin",
+   as.integer(chnLen), as.integer(expDim), out = double(chnLen*expDim))$out,
+   nrow = chnLen, byrow = T)
> chn5 <- matrix(.C("GSLmatLoad",
+   "chains/EXPout_trj_3_5.gbin",
+   as.integer(chnLen), as.integer(expDim), out = double(chnLen*expDim))$out,
+   nrow = chnLen, byrow = T)
> grMat   <- matrix(gelRub("chn", nChn, chnLen), ncol = d, byrow = T)
> grFrame <- data.frame(Gelman.Rubin=c(grMat), trait=rep(trtNam, each = Nexp))
> grMaxInd <- apply(grMat, 2, function(vec){which(vec == max(vec))[1]})
> acMat   <- mcmcAcf("chn", 5)
> acFrame <- data.frame(autocorrelation=c(acMat), trait=rep(trtNam, prod(dim(acMat))/2),
+   lag=rep(0:33, each = nrow(acMat)))
>
> showtext_auto()
> ggplot(data=grFrame,
+   aes(x=trait, y=Gelman.Rubin)) +
+   geom_boxplot(fill="grey80") +
+   theme_classic(base_size=18, base_family="myriad")
>
```

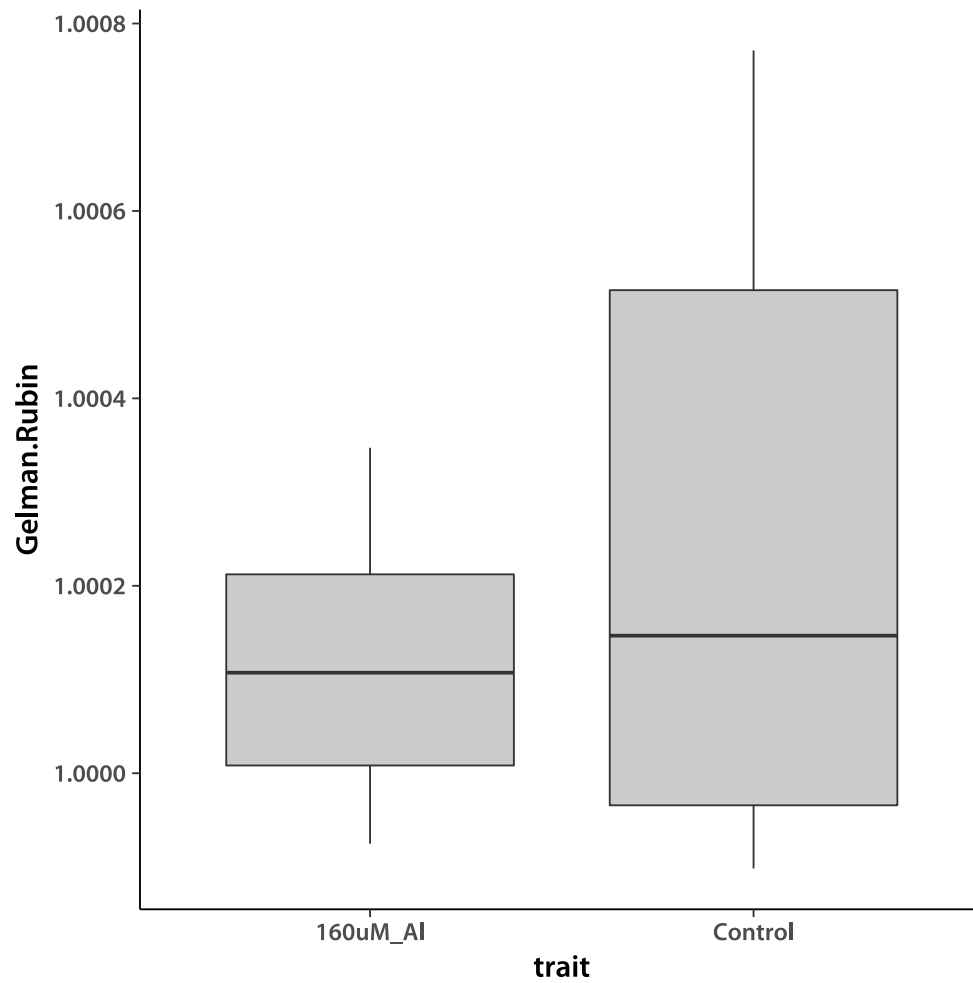

Values smaller than  $\sim 1.2$  indicate good convergence. I check by plotting an the chains with the worst G-R statistic for each trait.

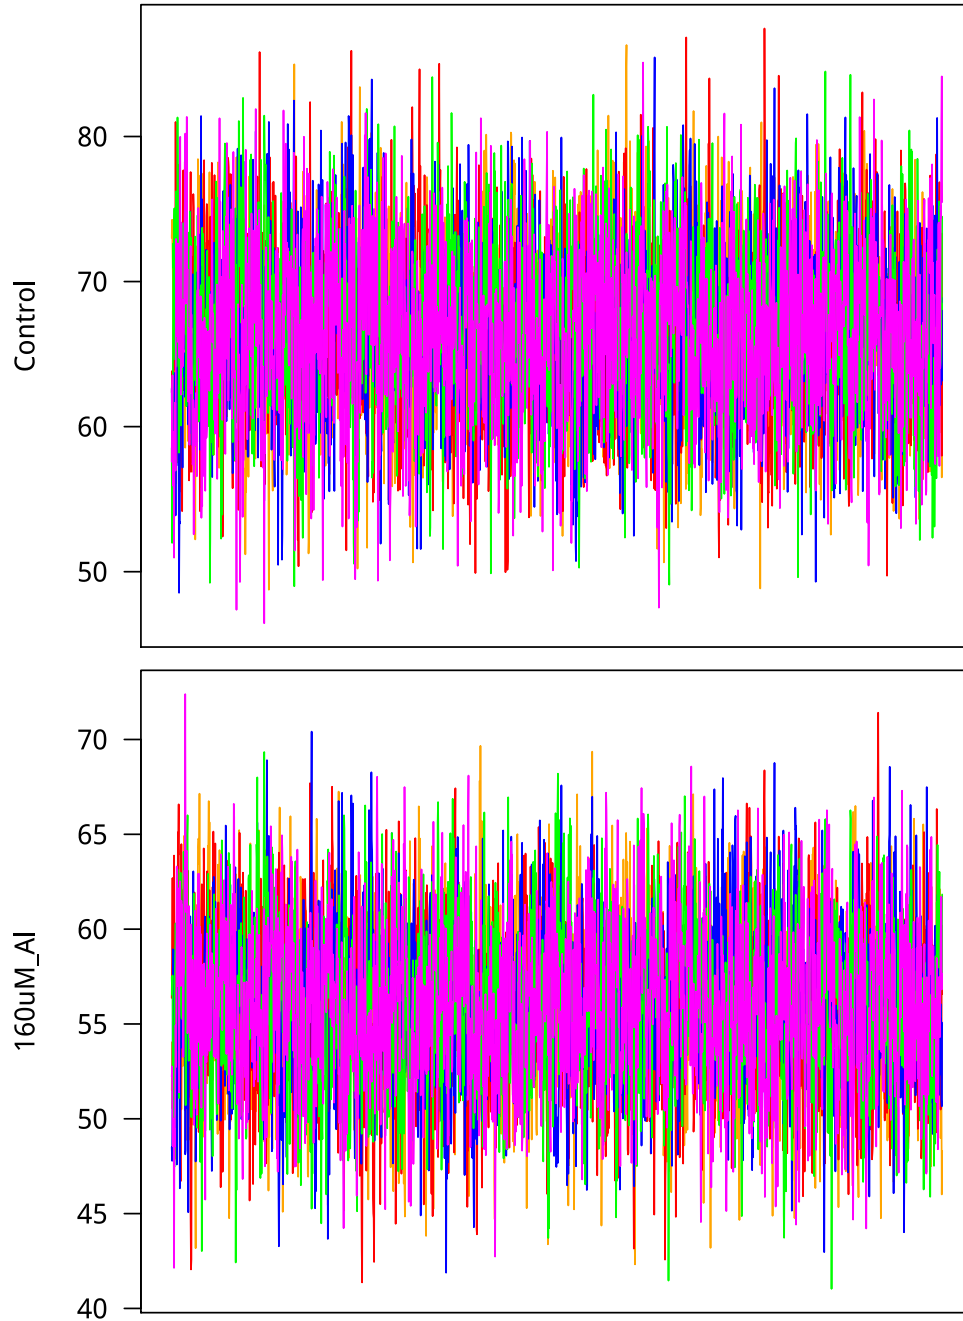

Now I look at mixing. Lag is on the  $x$  axis.

```
> ggTrt1 <- ggplot(data=subset(acFrame, trait==trtNam[1]),
+   aes(x=lag, y=autocorrelation)) +
+   geom_boxplot(fill="grey80", aes(group=cut_interval(lag, n=34))) +
+   theme_classic(base_size=18, base_family="myriad") +
+   labs(title=trtNam[1])
> ggTrt2 <- ggplot(data=subset(acFrame, trait==trtNam[2]),
```

```

+       aes(x=lag, y=autocorrelation)) +
+       geom_boxplot(fill="grey80", aes(group=cut_interval(lag, n=34))) +
+       theme_classic(base_size=18, base_family="myriad") +
+       labs(title=trtNam[2])
> showtext_auto()
> grid.arrange(ggTrt1, ggTrt2, nrow = 2)
>

```

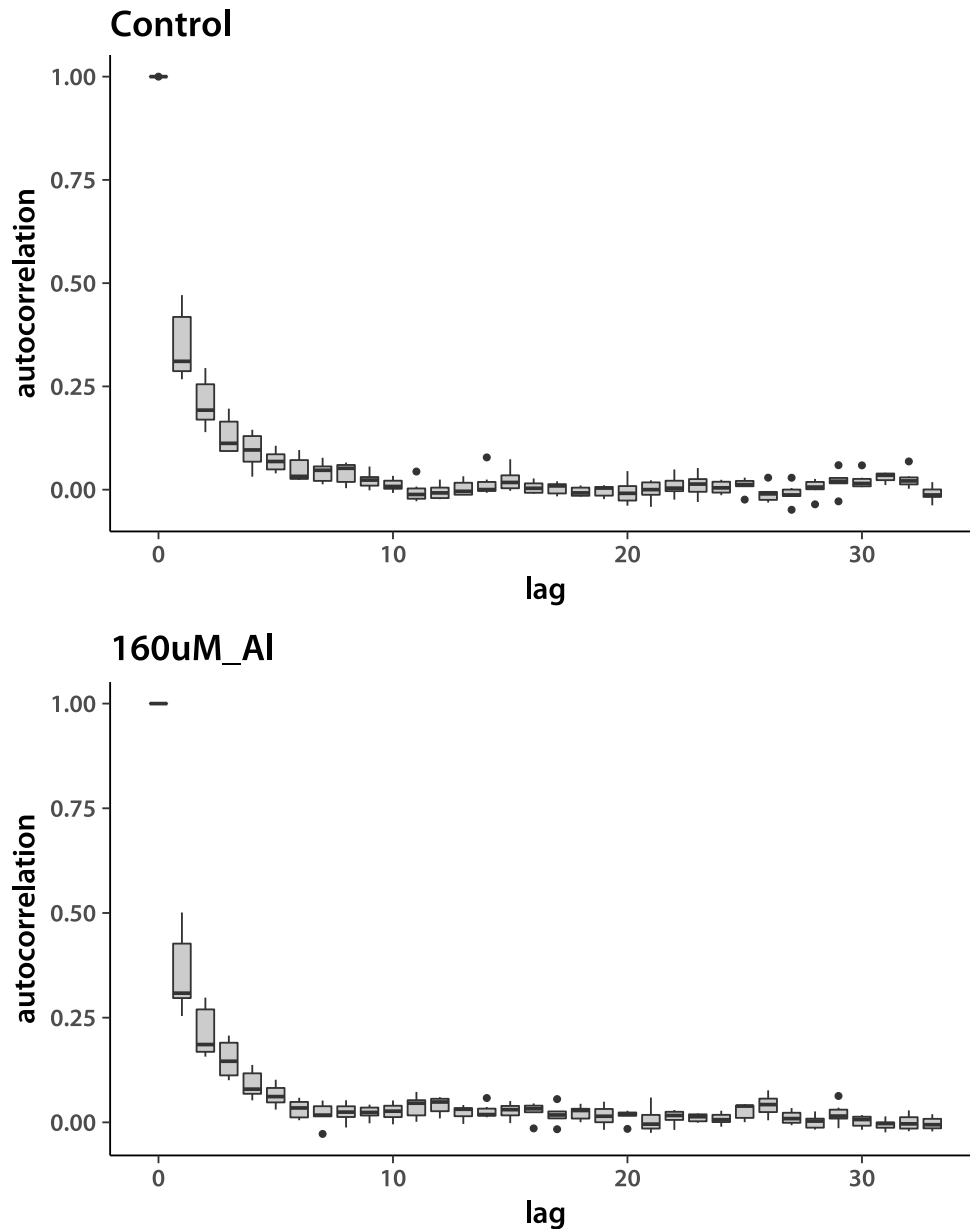

Next, tropical *japonica* with admixture.

```
> chn1 <- matrix(.C("GSLmatLoad",
```

```
+   "chains/EXPout_trja_3_1.gbin",
+   as.integer(chnLen), as.integer(expDim), out = double(chnLen*expDim))$out,
+   nrow = chnLen, byrow = T)
> chn2 <- matrix(.C("GSLmatLoad",
+   "chains/EXPout_trja_3_2.gbin",
+   as.integer(chnLen), as.integer(expDim), out = double(chnLen*expDim))$out,
+   nrow = chnLen, byrow = T)
> chn3 <- matrix(.C("GSLmatLoad",
+   "chains/EXPout_trja_3_3.gbin",
+   as.integer(chnLen), as.integer(expDim), out = double(chnLen*expDim))$out,
+   nrow = chnLen, byrow = T)
> chn4 <- matrix(.C("GSLmatLoad",
+   "chains/EXPout_trja_3_4.gbin",
+   as.integer(chnLen), as.integer(expDim), out = double(chnLen*expDim))$out,
+   nrow = chnLen, byrow = T)
> chn5 <- matrix(.C("GSLmatLoad",
+   "chains/EXPout_trja_3_5.gbin",
+   as.integer(chnLen), as.integer(expDim), out = double(chnLen*expDim))$out,
+   nrow = chnLen, byrow = T)
> grMat   <- matrix(gelRub("chn", nChn, chnLen), ncol = d, byrow = T)
> grFrame <- data.frame(Gelman.Rubin=c(grMat), trait=rep(trtNam, each = Nexp))
> grMaxInd <- apply(grMat, 2, function(vec){which(vec == max(vec))[1]})
> acMat   <- mcmcAcf("chn", 5)
> acFrame <- data.frame(autocorrelation=c(acMat), trait=rep(trtNam, prod(dim(acMat))/2),
+   lag=rep(0:33, each = nrow(acMat)))
>
> showtext_auto()
> ggplot(data=grFrame,
+   aes(x=trait, y=Gelman.Rubin)) +
+   geom_boxplot(fill="grey80") +
+   theme_classic(base_size=18, base_family="myriad")
>
```

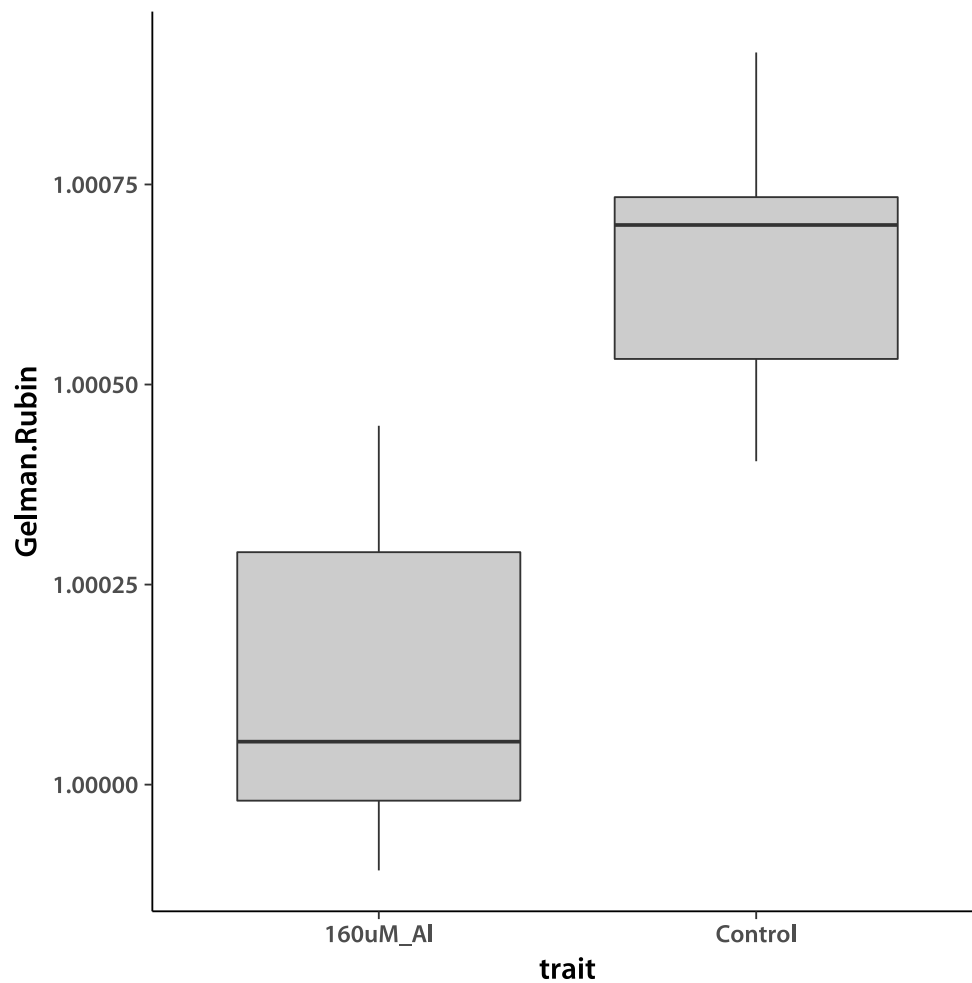

Values smaller than  $\sim 1.2$  indicate good convergence. I check by plotting an the chains with the worst G-R statistic for each trait.

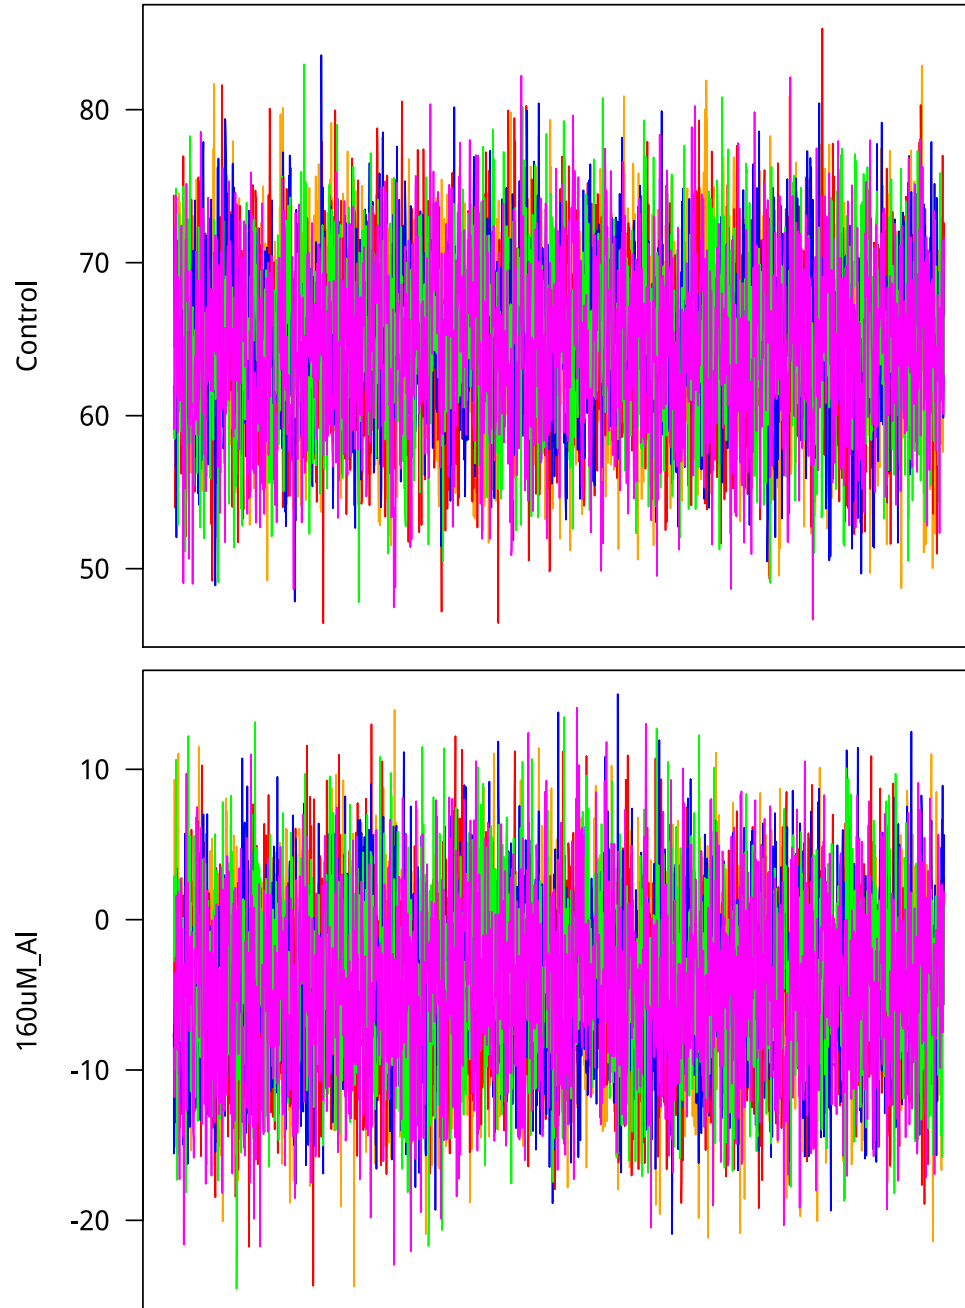

Now I look at mixing. Lag is on the  $x$  axis.

```
> ggTrt1 <- ggplot(data=subset(acFrame, trait==trtNam[1]),  
+   aes(x=lag, y=autocorrelation)) +  
+   geom_boxplot(fill="grey80", aes(group=cut_interval(lag, n=34))) +  
+   theme_classic(base_size=18, base_family="myriad") +  
+   labs(title=trtNam[1])  
> ggTrt2 <- ggplot(data=subset(acFrame, trait==trtNam[2]),
```

```

+       aes(x=lag, y=autocorrelation)) +
+       geom_boxplot(fill="grey80", aes(group=cut_interval(lag, n=34))) +
+       theme_classic(base_size=18, base_family="myriad") +
+       labs(title=trtNam[2])
> showtext_auto()
> grid.arrange(ggTrt1, ggTrt2, nrow = 2)
>

```

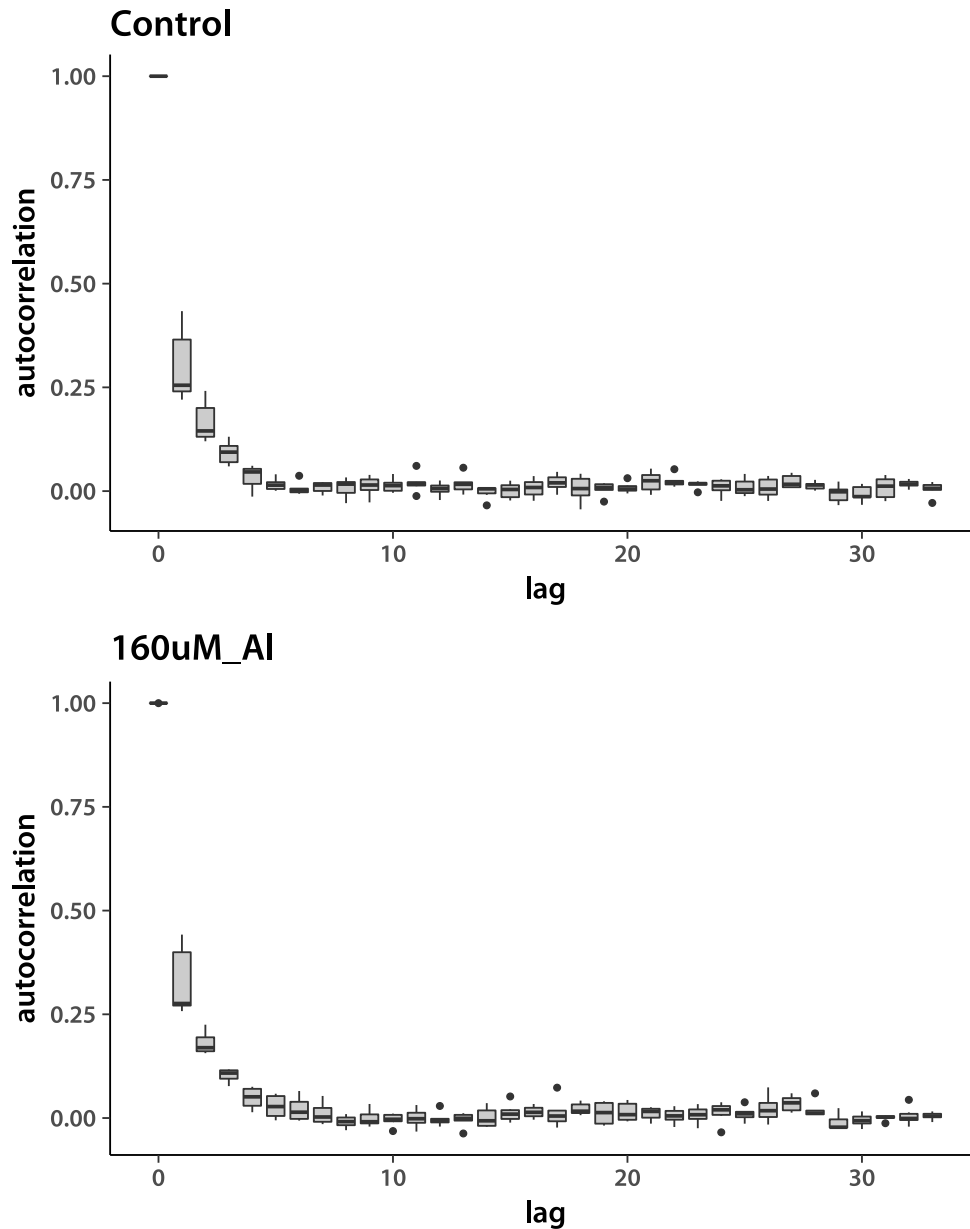

Everything looks good. I next look at the accession means, *aus* first.

```
> Nacc <- 55
```

```
> locDim <- d*Nacc
> chn1 <- matrix(.C("GSLmatLoad",
+   "chains/LNout_aus_3_1.gbin",
+   as.integer(chnLen), as.integer(locDim), out = double(chnLen*locDim))$out,
+   nrow = chnLen, byrow = T)
> chn2 <- matrix(.C("GSLmatLoad",
+   "chains/LNout_aus_3_2.gbin",
+   as.integer(chnLen), as.integer(locDim), out = double(chnLen*locDim))$out,
+   nrow = chnLen, byrow = T)
> chn3 <- matrix(.C("GSLmatLoad",
+   "chains/LNout_aus_3_3.gbin",
+   as.integer(chnLen), as.integer(locDim), out = double(chnLen*locDim))$out,
+   nrow = chnLen, byrow = T)
> chn4 <- matrix(.C("GSLmatLoad",
+   "chains/LNout_aus_3_4.gbin",
+   as.integer(chnLen), as.integer(locDim), out = double(chnLen*locDim))$out,
+   nrow = chnLen, byrow = T)
> chn5 <- matrix(.C("GSLmatLoad",
+   "chains/LNout_aus_3_5.gbin",
+   as.integer(chnLen), as.integer(locDim), out = double(chnLen*locDim))$out,
+   nrow = chnLen, byrow = T)
> grMat <- matrix(gelRub("chn", nChn, chnLen), ncol = d, byrow = T)
> grFrame <- data.frame(Gelman.Rubin=c(grMat), trait=rep(trtNam, each = Nacc))
> grMaxInd <- apply(grMat, 2, function(vec){which(vec == max(vec))[1]})
> acMat <- mcmcAcf("chn", 5)
> acFrame <- data.frame(autocorrelation=c(acMat), trait=rep(trtNam, prod(dim(acMat))/2),
+   lag=rep(0:33, each = nrow(acMat)))
>
```

Plot the *aus* results.

```
> showtext_auto()
> ggplot(data=grFrame,
+   aes(x=trait, y=Gelman.Rubin)) +
+   geom_boxplot(fill="grey80") +
+   theme_classic(base_size=18, base_family="myriad")
>
```

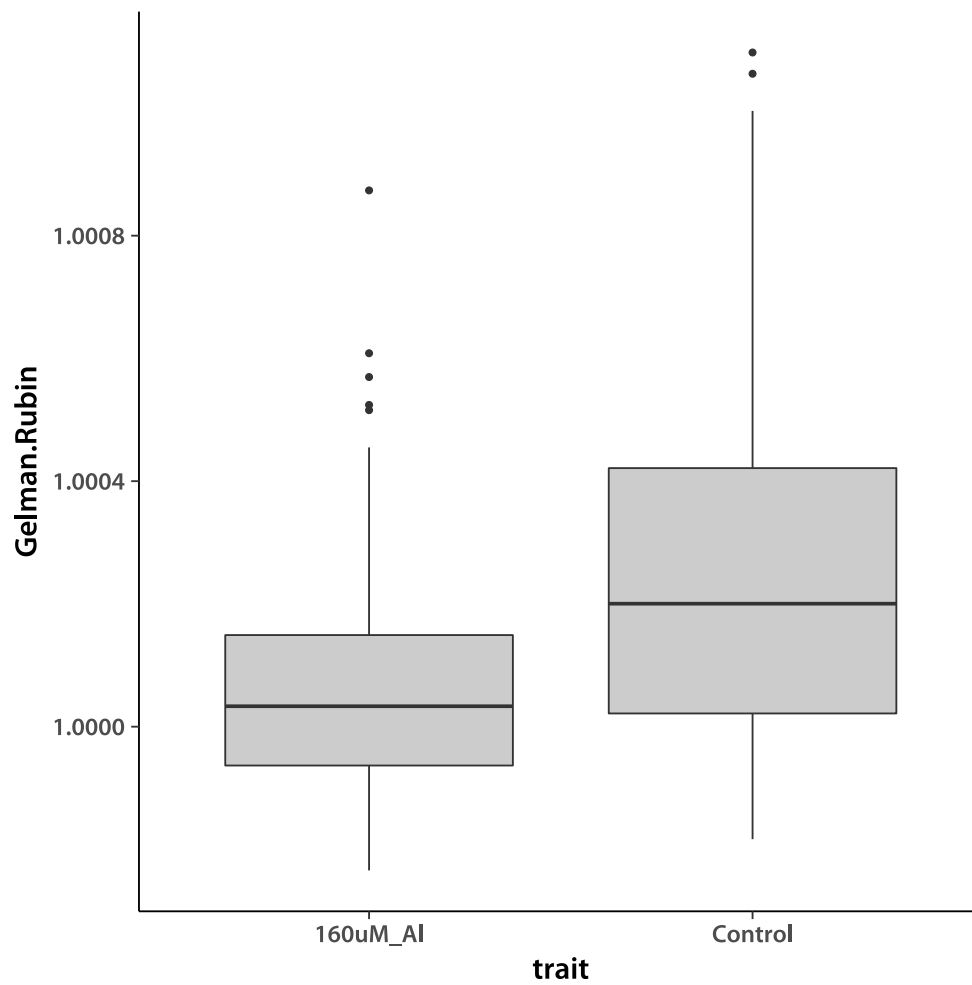

Values smaller than  $\sim 1.2$  indicate good convergence. I check by plotting an the chains with the worst G-R statistic for each trait.

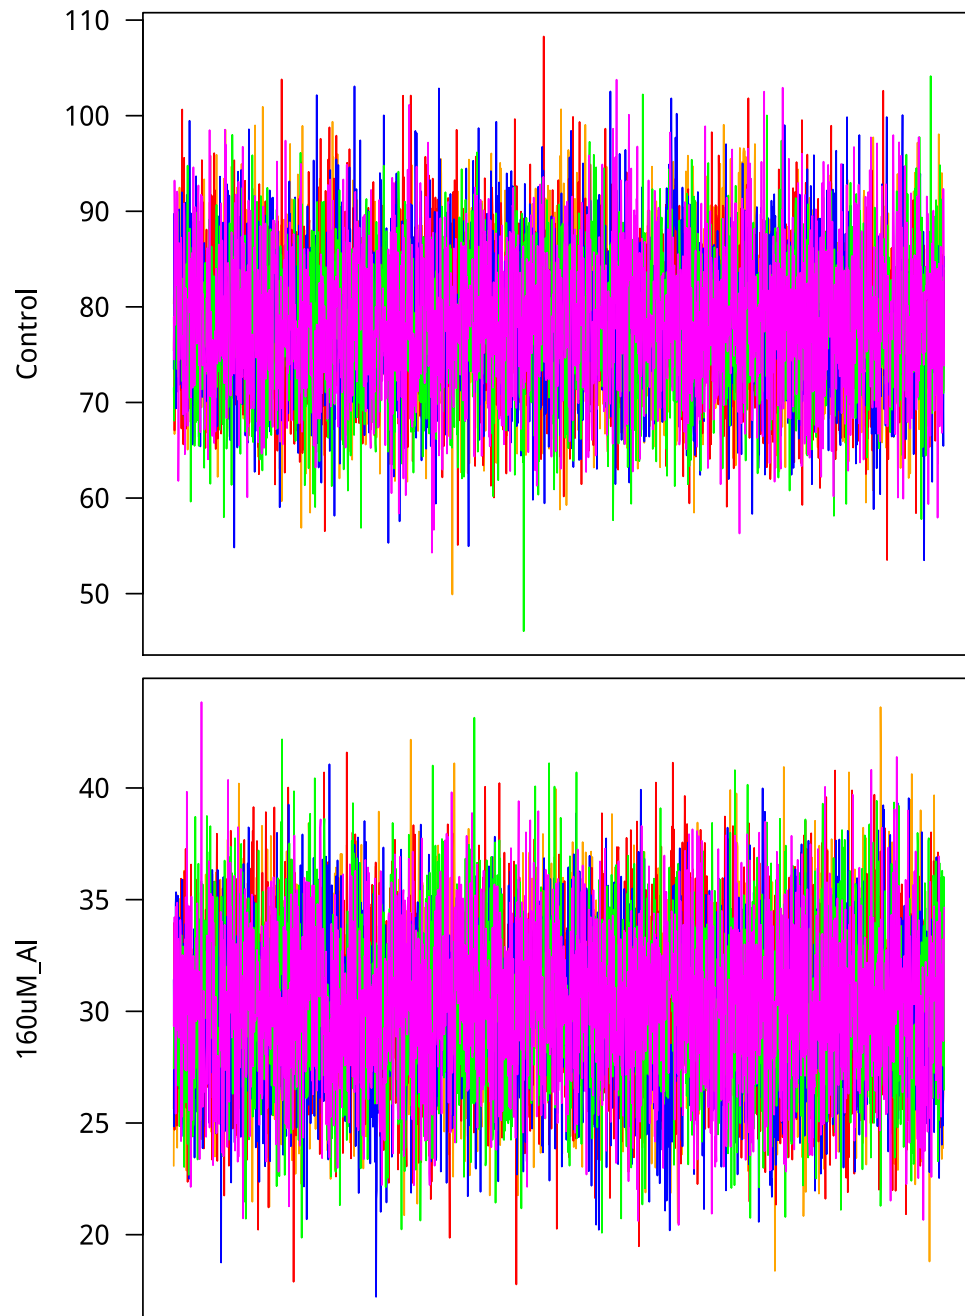

Now I look at mixing. Lag is on the  $x$  axis.

```
> ggTrt1 <- ggplot(data=subset(acFrame, trait==trtNam[1]),  
+   aes(x=l原因, y=autocorrelation)) +  
+   geom_boxplot(fill="grey80", aes(group=cut_interval(lag, n=34))) +  
+   theme_classic(base_size=18, base_family="myriad") +  
+   labs(title=trtNam[1])  
> ggTrt2 <- ggplot(data=subset(acFrame, trait==trtNam[2]),
```

```

+       aes(x=lag, y=autocorrelation)) +
+       geom_boxplot(fill="grey80", aes(group=cut_interval(lag, n=34))) +
+       theme_classic(base_size=18, base_family="myriad") +
+       labs(title=trtNam[2])
> showtext_auto()
> grid.arrange(ggTrt1, ggTrt2, nrow = 2)
>

```

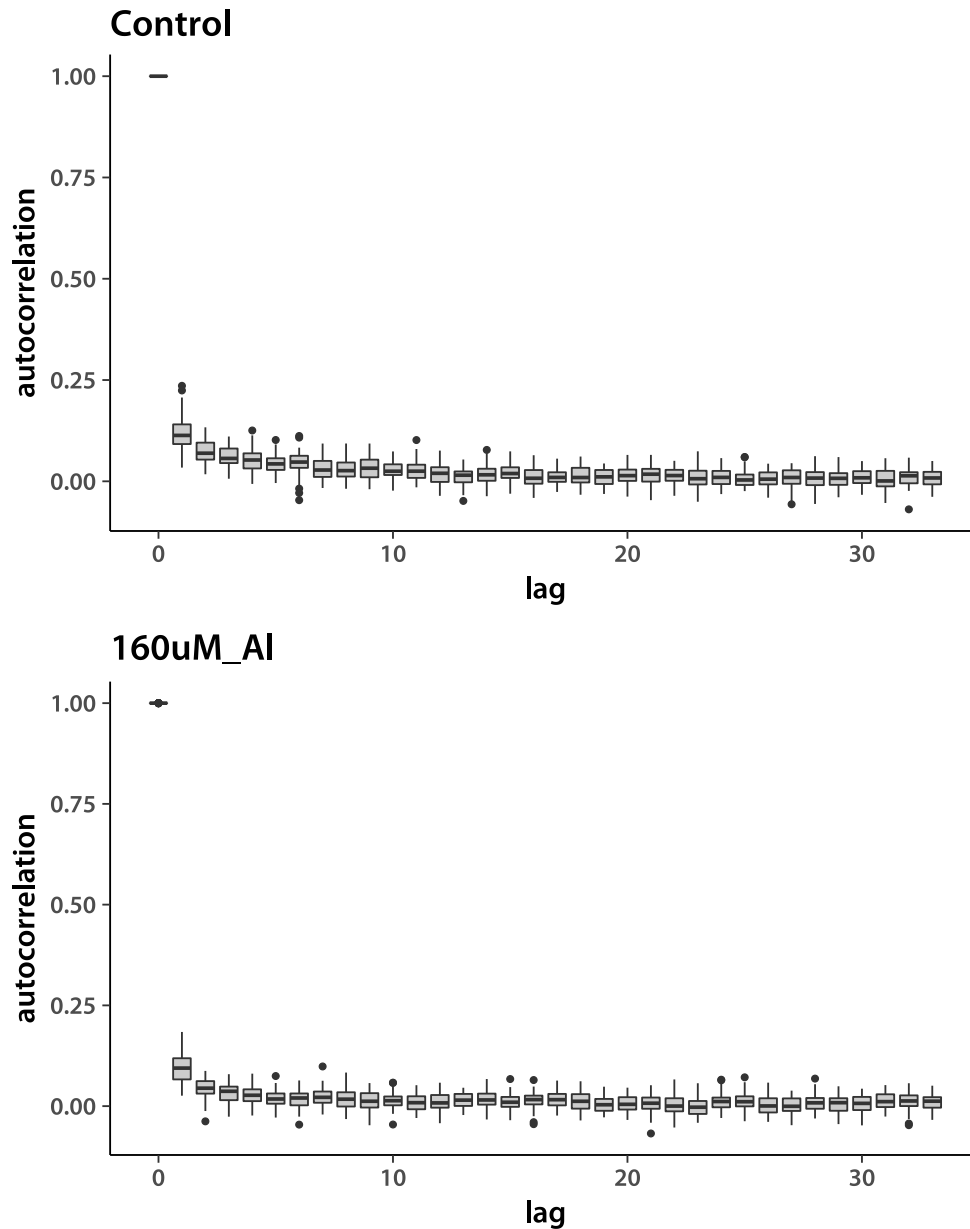

Looks good. Now do the tropical *japonica*.

```
> Nacc <- 92
```

```
> locDim <- d*Nacc
> chn1 <- matrix(.C("GSLmatLoad",
+   "chains/LNout_trj_3_1.gbin",
+   as.integer(chnLen), as.integer(locDim), out = double(chnLen*locDim))$out,
+   nrow = chnLen, byrow = T)
> chn2 <- matrix(.C("GSLmatLoad",
+   "chains/LNout_trj_3_2.gbin",
+   as.integer(chnLen), as.integer(locDim), out = double(chnLen*locDim))$out,
+   nrow = chnLen, byrow = T)
> chn3 <- matrix(.C("GSLmatLoad",
+   "chains/LNout_trj_3_3.gbin",
+   as.integer(chnLen), as.integer(locDim), out = double(chnLen*locDim))$out,
+   nrow = chnLen, byrow = T)
> chn4 <- matrix(.C("GSLmatLoad",
+   "chains/LNout_trj_3_4.gbin",
+   as.integer(chnLen), as.integer(locDim), out = double(chnLen*locDim))$out,
+   nrow = chnLen, byrow = T)
> chn5 <- matrix(.C("GSLmatLoad",
+   "chains/LNout_trj_3_5.gbin",
+   as.integer(chnLen), as.integer(locDim), out = double(chnLen*locDim))$out,
+   nrow = chnLen, byrow = T)
> grMat <- matrix(gelRub("chn", nChn, chnLen), ncol = d, byrow = T)
> grFrame <- data.frame(Gelman.Rubin=c(grMat), trait=rep(trtNam, each = Nacc))
> grMaxInd <- apply(grMat, 2, function(vec){which(vec == max(vec))[1]})
> acMat <- mcmcAcf("chn", 5)
> acFrame <- data.frame(autocorrelation=c(acMat), trait=rep(trtNam, prod(dim(acMat))/2),
+   lag=rep(0:33, each = nrow(acMat)))
>
```

Plot the *aus* results.

```
> showtext_auto()
> ggplot(data=grFrame,
+   aes(x=trait, y=Gelman.Rubin)) +
+   geom_boxplot(fill="grey80") +
+   theme_classic(base_size=18, base_family="myriad")
>
```

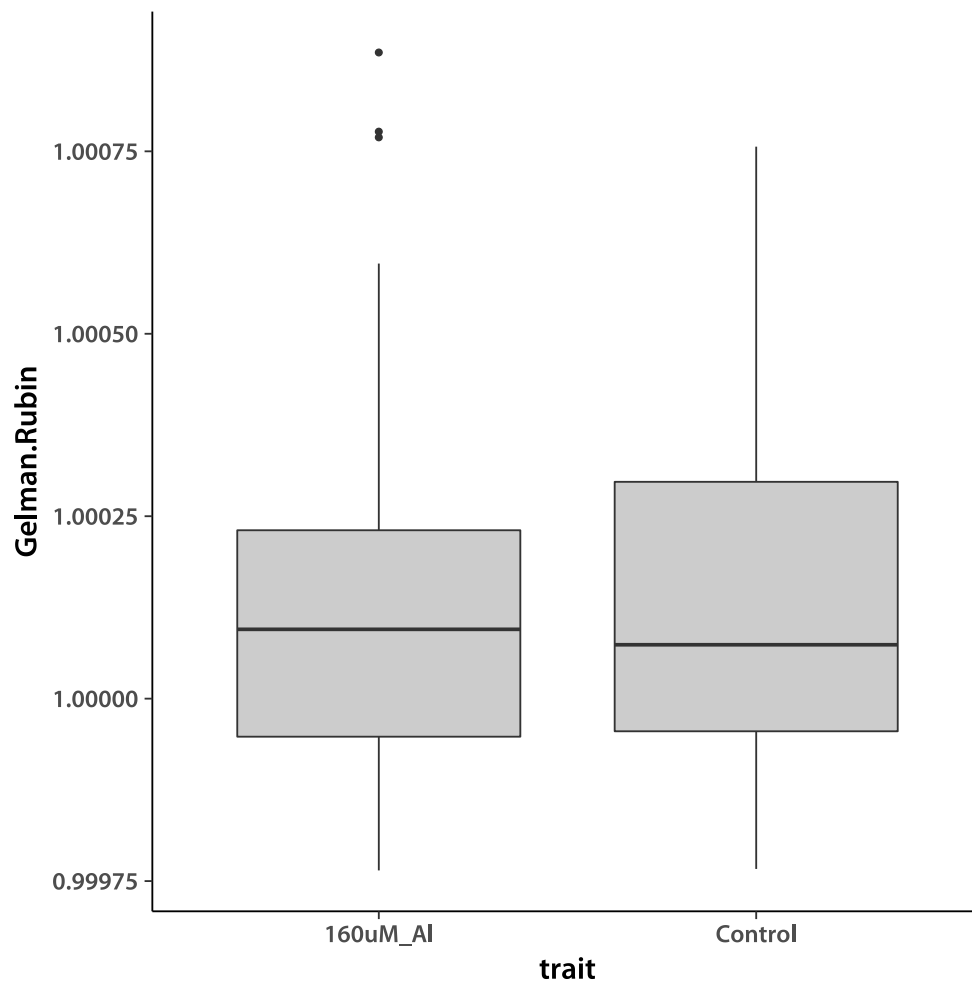

Values smaller than  $\sim 1.2$  indicate good convergence. I check by plotting an the chains with the worst G-R statistic for each trait.

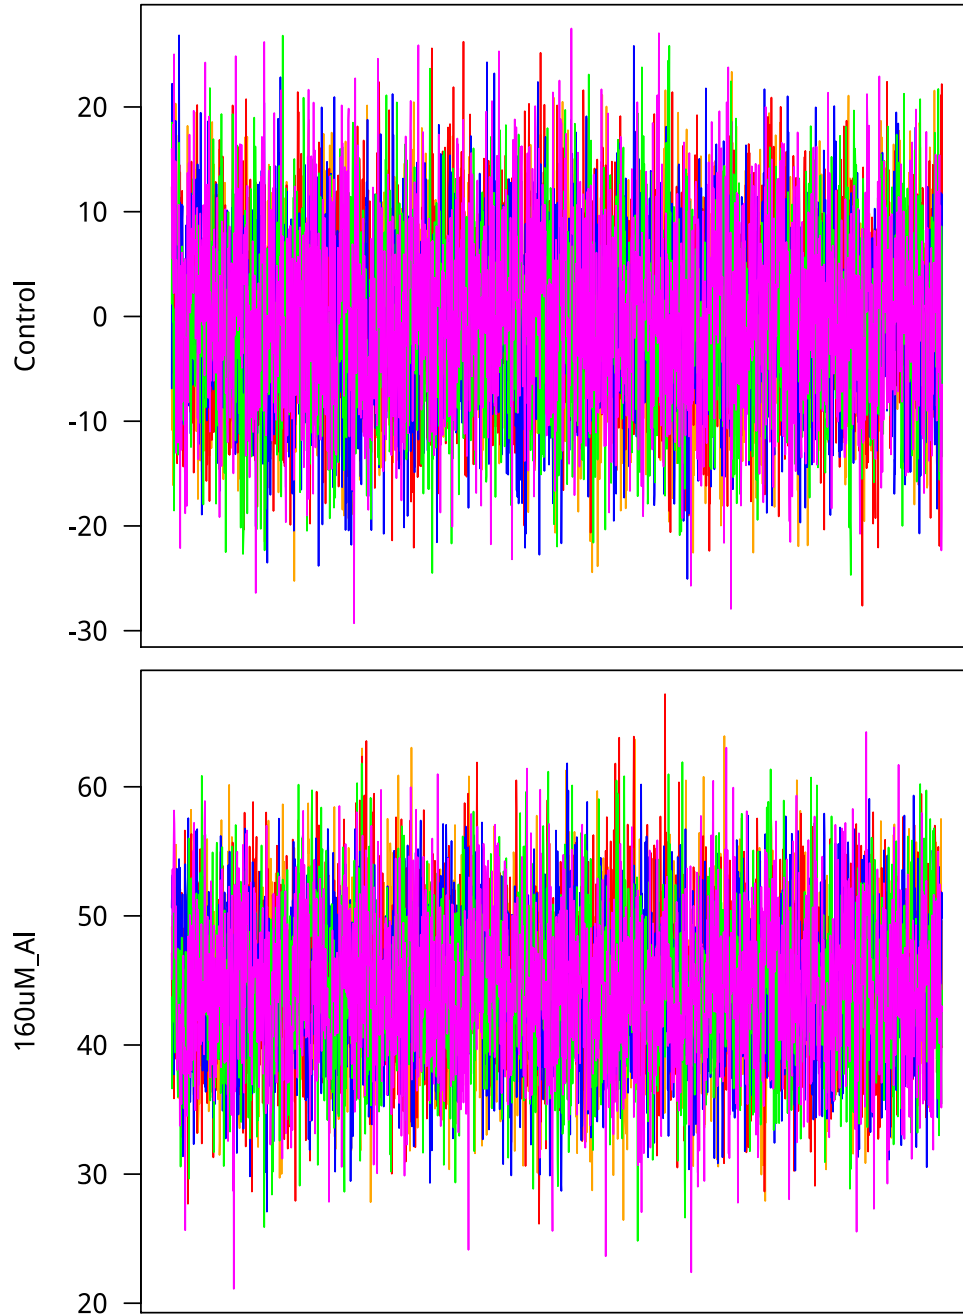

Now I look at mixing. Lag is on the  $x$  axis.

```
> ggTrt1 <- ggplot(data=subset(acFrame, trait==trtNam[1]),
+   aes(x=lag, y=autocorrelation)) +
+   geom_boxplot(fill="grey80", aes(group=cut_interval(lag, n=34))) +
+   theme_classic(base_size=18, base_family="myriad") +
+   labs(title=trtNam[1])
> ggTrt2 <- ggplot(data=subset(acFrame, trait==trtNam[2]),
```

```

+       aes(x=lag, y=autocorrelation)) +
+       geom_boxplot(fill="grey80", aes(group=cut_interval(lag, n=34))) +
+       theme_classic(base_size=18, base_family="myriad") +
+       labs(title=trtNam[2])
> showtext_auto()
> grid.arrange(ggTrt1, ggTrt2, nrow = 2)
>

```

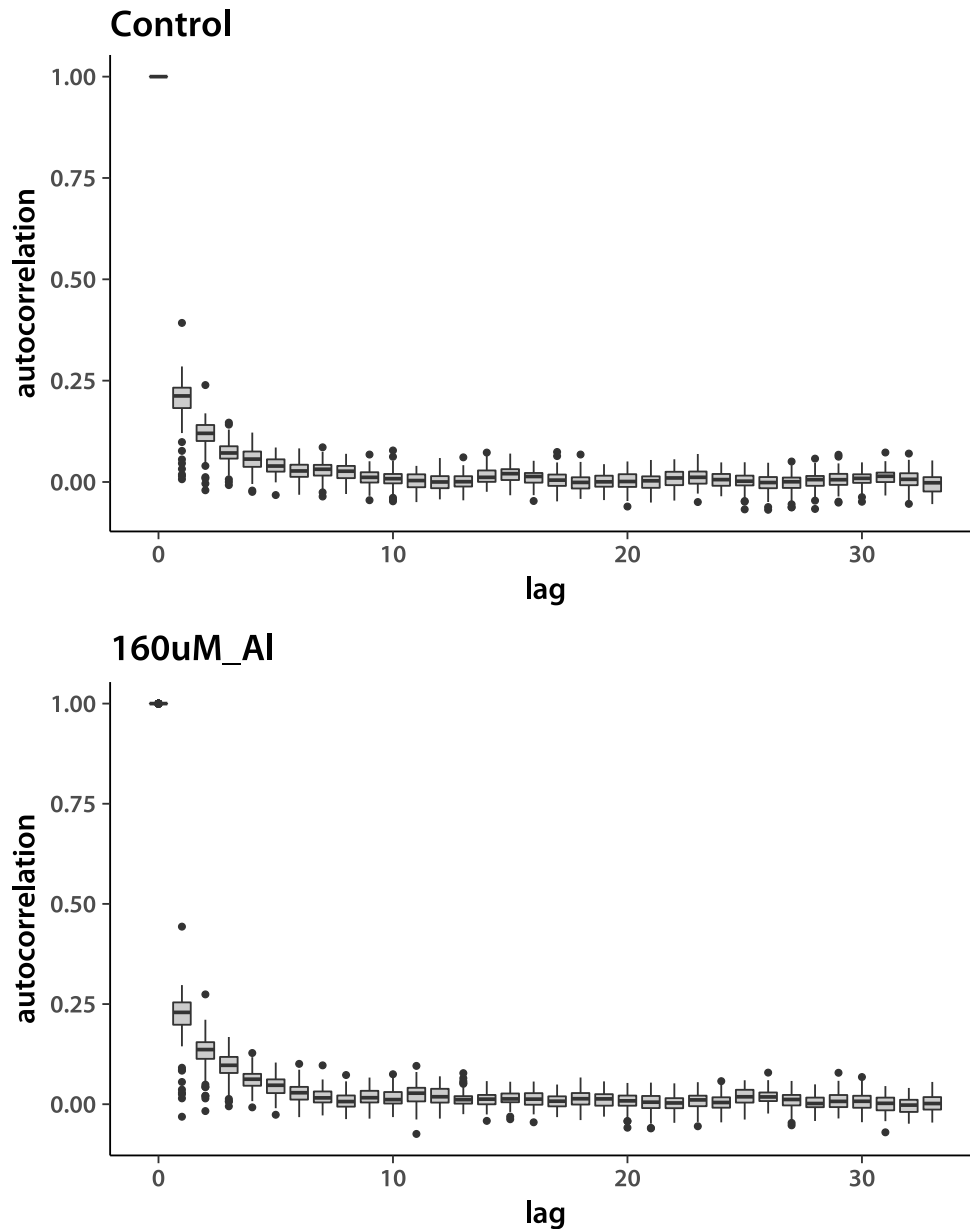

Next, admixed tropical *japonica*.

```
> Nacc <- 95
```

```
> locDim <- d*Nacc
> chn1 <- matrix(.C("GSLmatLoad",
+   "chains/LNout_trja_3_1.gbin",
+   as.integer(chnLen), as.integer(locDim), out = double(chnLen*locDim))$out,
+   nrow = chnLen, byrow = T)
> chn2 <- matrix(.C("GSLmatLoad",
+   "chains/LNout_trja_3_2.gbin",
+   as.integer(chnLen), as.integer(locDim), out = double(chnLen*locDim))$out,
+   nrow = chnLen, byrow = T)
> chn3 <- matrix(.C("GSLmatLoad",
+   "chains/LNout_trja_3_3.gbin",
+   as.integer(chnLen), as.integer(locDim), out = double(chnLen*locDim))$out,
+   nrow = chnLen, byrow = T)
> chn4 <- matrix(.C("GSLmatLoad",
+   "chains/LNout_trja_3_4.gbin",
+   as.integer(chnLen), as.integer(locDim), out = double(chnLen*locDim))$out,
+   nrow = chnLen, byrow = T)
> chn5 <- matrix(.C("GSLmatLoad",
+   "chains/LNout_trja_3_5.gbin",
+   as.integer(chnLen), as.integer(locDim), out = double(chnLen*locDim))$out,
+   nrow = chnLen, byrow = T)
> grMat <- matrix(gelRub("chn", nChn, chnLen), ncol = d, byrow = T)
> grFrame <- data.frame(Gelman.Rubin=c(grMat), trait=rep(trtNam, each = Nacc))
> grMaxInd <- apply(grMat, 2, function(vec){which(vec == max(vec))[1]})
> acMat <- mcmcAcf("chn", 5)
> acFrame <- data.frame(autocorrelation=c(acMat), trait=rep(trtNam, prod(dim(acMat))/2),
+   lag=rep(0:33, each = nrow(acMat)))
>
```

Plot the *aus* results.

```
> showtext_auto()
> ggplot(data=grFrame,
+   aes(x=trait, y=Gelman.Rubin)) +
+   geom_boxplot(fill="grey80") +
+   theme_classic(base_size=18, base_family="myriad")
>
```

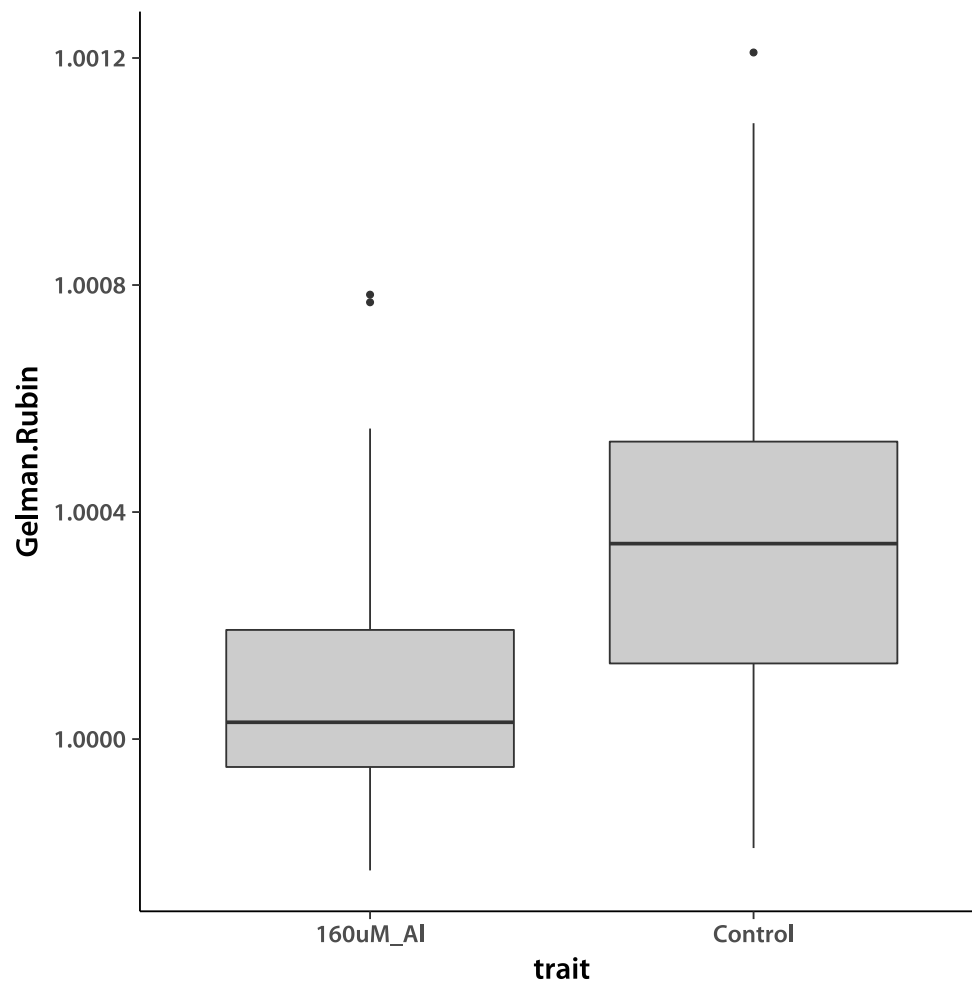

Values smaller than  $\sim 1.2$  indicate good convergence. I check by plotting an the chains with the worst G-R statistic for each trait.

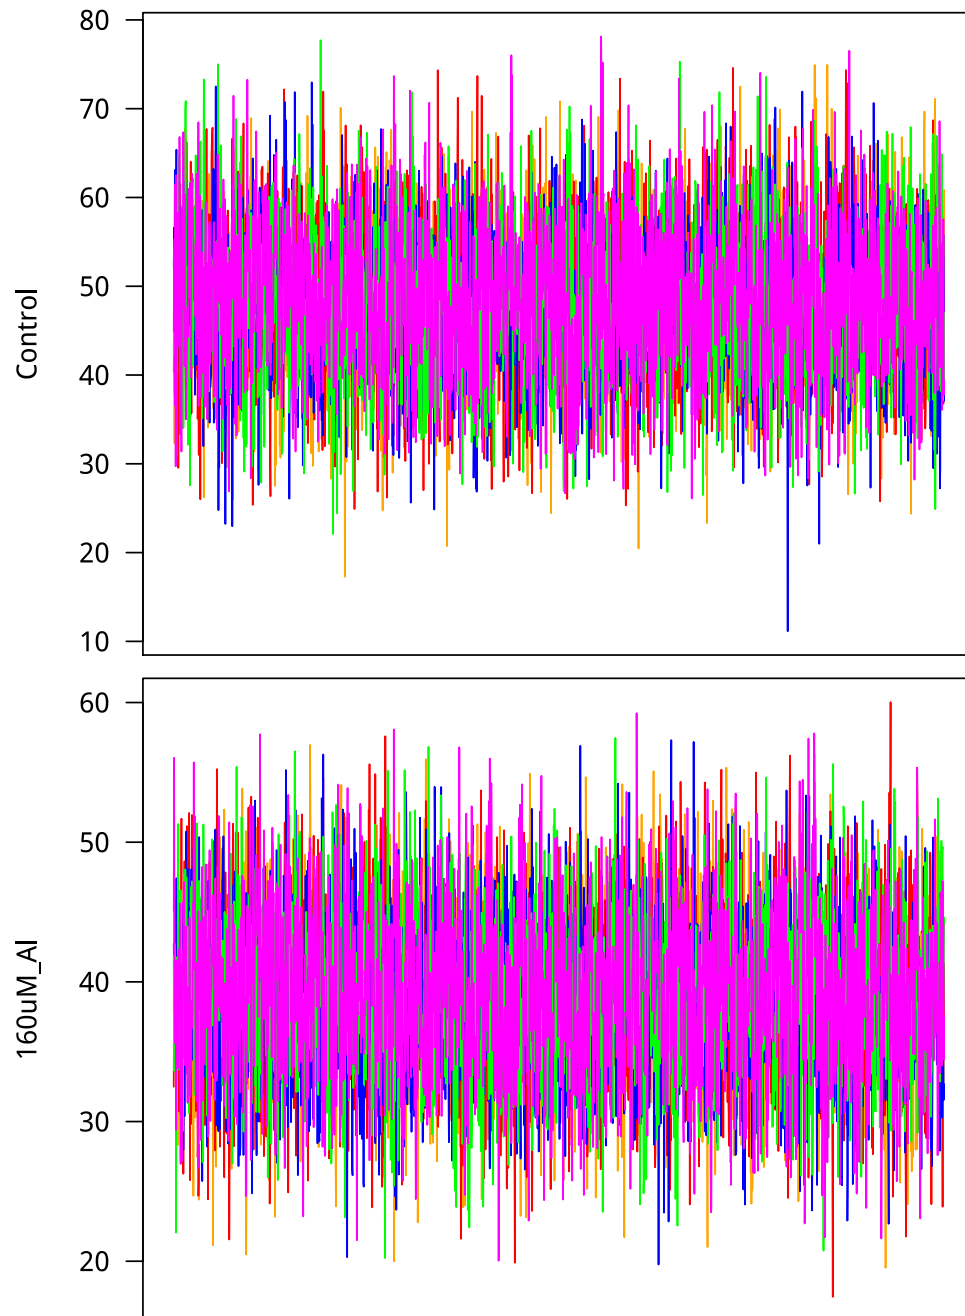

Now I look at mixing. Lag is on the  $x$  axis.

```
> ggTrt1 <- ggplot(data=subset(acFrame, trait==trtNam[1]),
+   aes(x=l原因, y=autocorrelation)) +
+   geom_boxplot(fill="grey80", aes(group=cut_interval(lag, n=34))) +
+   theme_classic(base_size=18, base_family="myriad") +
+   labs(title=trtNam[1])
> ggTrt2 <- ggplot(data=subset(acFrame, trait==trtNam[2]),
```

```

+       aes(x=lag, y=autocorrelation)) +
+       geom_boxplot(fill="grey80", aes(group=cut_interval(lag, n=34))) +
+       theme_classic(base_size=18, base_family="myriad") +
+       labs(title=trtNam[2])
> showtext_auto()
> grid.arrange(ggTrt1, ggTrt2, nrow = 2)
>

```

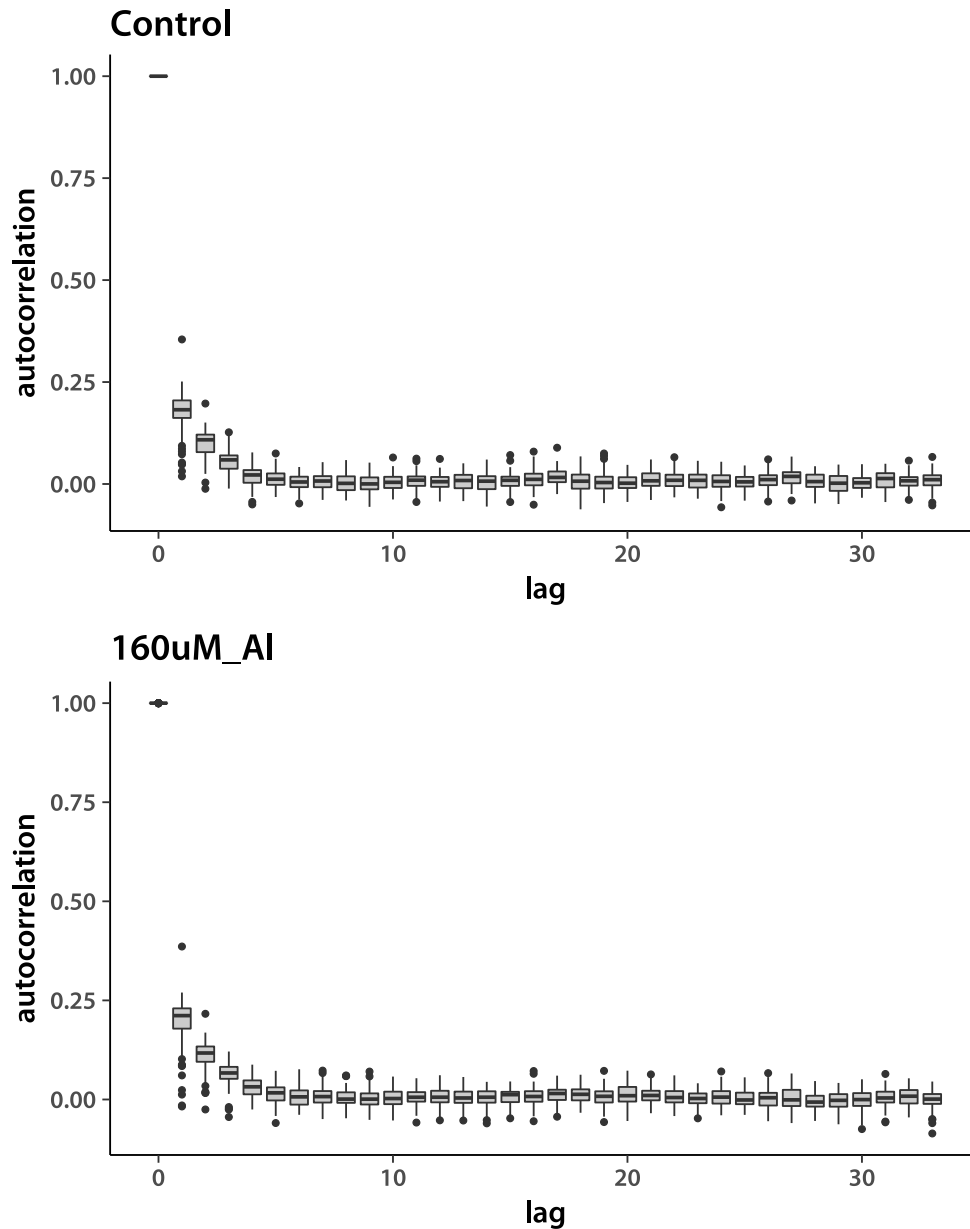

Everything looks good. Now examine GEBV chains, again starting with *aus*.

```
> Nacc <- 55
```

```
> locDim <- d*Nacc
> chn1 <- matrix(.C("GSLmatLoad",
+   "chains/BVout_aus_3_1.gbin",
+   as.integer(chnLen), as.integer(locDim), out = double(chnLen*locDim))$out,
+   nrow = chnLen, byrow = T)
> chn2 <- matrix(.C("GSLmatLoad",
+   "chains/BVout_aus_3_2.gbin",
+   as.integer(chnLen), as.integer(locDim), out = double(chnLen*locDim))$out,
+   nrow = chnLen, byrow = T)
> chn3 <- matrix(.C("GSLmatLoad",
+   "chains/BVout_aus_3_3.gbin",
+   as.integer(chnLen), as.integer(locDim), out = double(chnLen*locDim))$out,
+   nrow = chnLen, byrow = T)
> chn4 <- matrix(.C("GSLmatLoad",
+   "chains/BVout_aus_3_4.gbin",
+   as.integer(chnLen), as.integer(locDim), out = double(chnLen*locDim))$out,
+   nrow = chnLen, byrow = T)
> chn5 <- matrix(.C("GSLmatLoad",
+   "chains/BVout_aus_3_5.gbin",
+   as.integer(chnLen), as.integer(locDim), out = double(chnLen*locDim))$out,
+   nrow = chnLen, byrow = T)
> grMat <- matrix(gelRub("chn", nChn, chnLen), ncol = d, byrow = T)
> grFrame <- data.frame(Gelman.Rubin=c(grMat), trait=rep(trtNam, each = Nacc))
> grMaxInd <- apply(grMat, 2, function(vec){which(vec == max(vec))[1]})
> acMat <- mcmcAcf("chn", 5)
> acFrame <- data.frame(autocorrelation=c(acMat), trait=rep(trtNam, prod(dim(acMat))/2),
+   lag=rep(0:33, each = nrow(acMat)))
>
```

Plot the *aus* results.

```
> showtext_auto()
> ggplot(data=grFrame,
+   aes(x=trait, y=Gelman.Rubin)) +
+   geom_boxplot(fill="grey80") +
+   theme_classic(base_size=18, base_family="myriad")
>
```

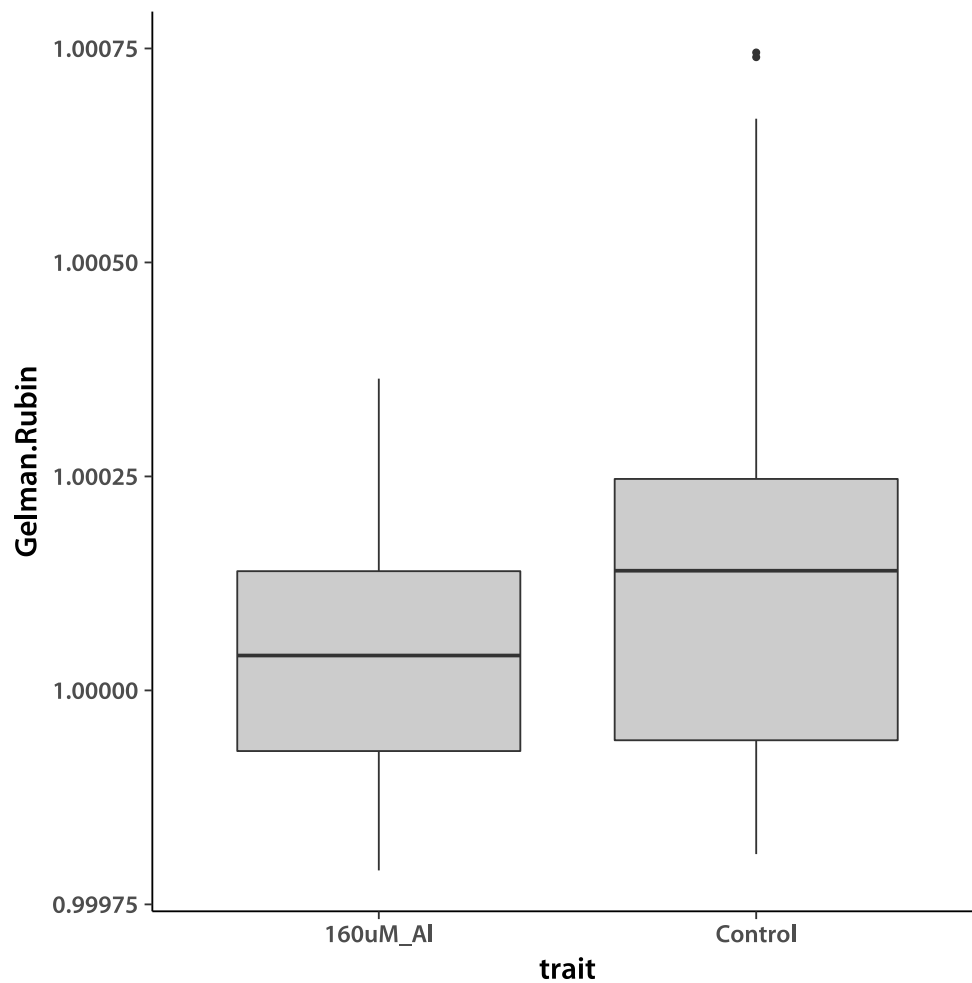

Values smaller than  $\sim 1.2$  indicate good convergence. I check by plotting an the chains with the worst G-R statistic for each trait.

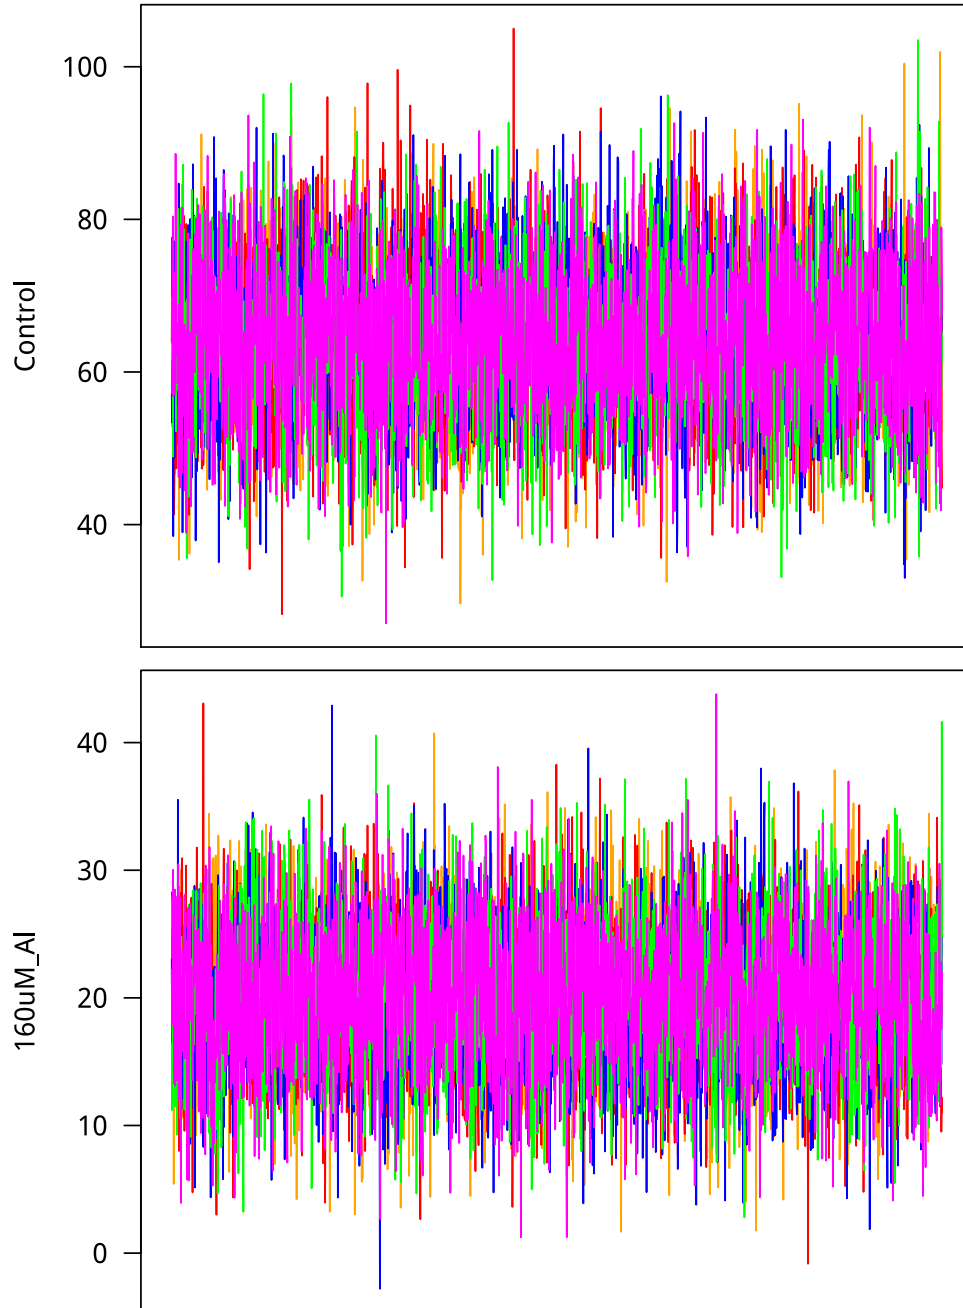

Now I look at mixing. Lag is on the  $x$  axis.

```
> ggTrt1 <- ggplot(data=subset(acFrame, trait==trtNam[1]),  
+   aes(x=lag, y=autocorrelation)) +  
+   geom_boxplot(fill="grey80", aes(group=cut_interval(lag, n=34))) +  
+   theme_classic(base_size=18, base_family="myriad") +  
+   labs(title=trtNam[1])  
> ggTrt2 <- ggplot(data=subset(acFrame, trait==trtNam[2]),
```

```
+       aes(x=lag, y=autocorrelation)) +  
+       geom_boxplot(fill="grey80", aes(group=cut_interval(lag, n=34))) +  
+       theme_classic(base_size=18, base_family="myriad") +  
+       labs(title=trtNam[2])  
> showtext_auto()  
> grid.arrange(ggTrt1, ggTrt2, nrow = 2)  
>
```

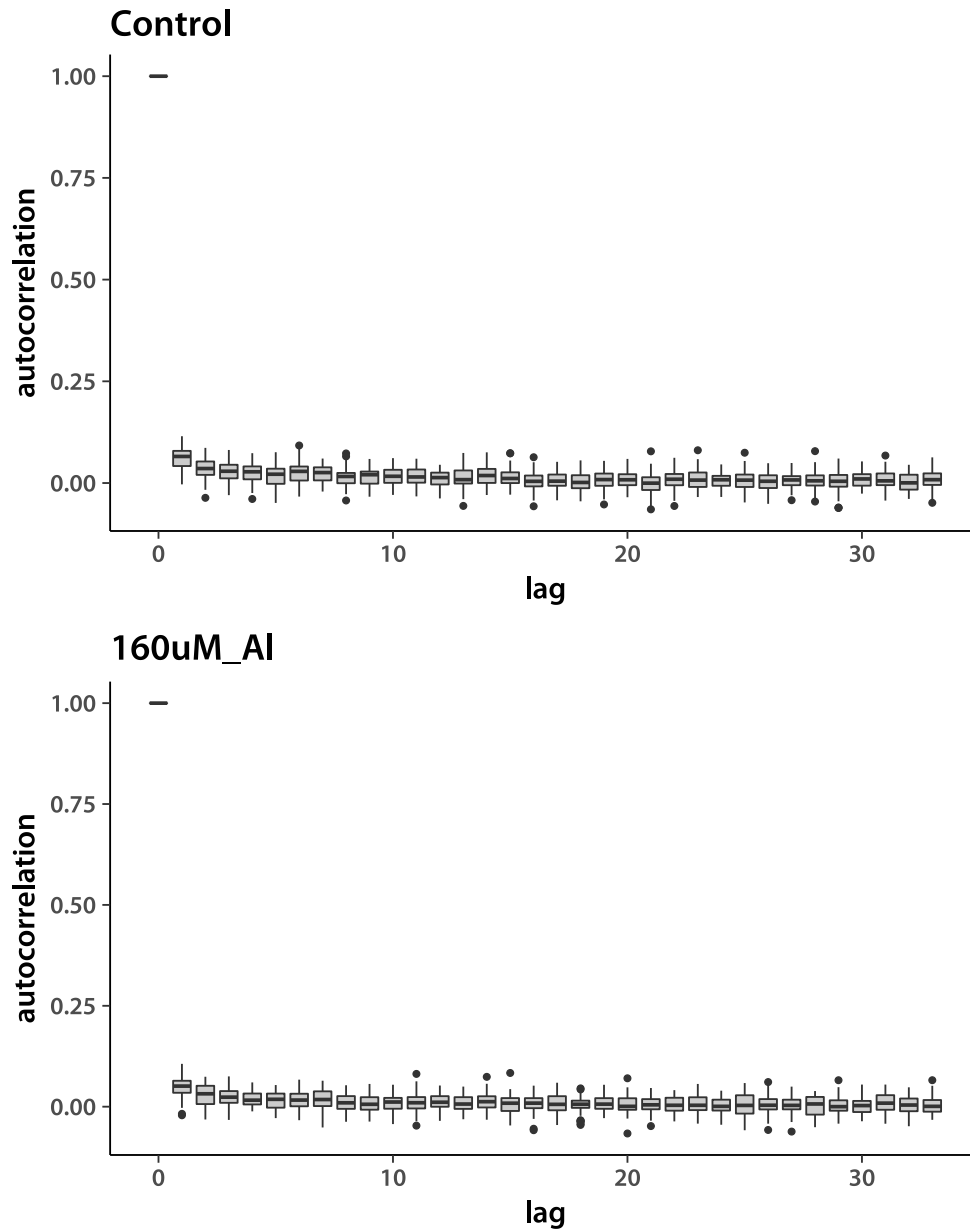

Looks good. Now do the tropical *japonica*.

```
> Nacc <- 92
```

```
> locDim <- d*Nacc
> chn1 <- matrix(.C("GSLmatLoad",
+   "chains/BVout_trj_3_1.gbin",
+   as.integer(chnLen), as.integer(locDim), out = double(chnLen*locDim))$out,
+   nrow = chnLen, byrow = T)
> chn2 <- matrix(.C("GSLmatLoad",
+   "chains/BVout_trj_3_2.gbin",
+   as.integer(chnLen), as.integer(locDim), out = double(chnLen*locDim))$out,
+   nrow = chnLen, byrow = T)
> chn3 <- matrix(.C("GSLmatLoad",
+   "chains/BVout_trj_3_3.gbin",
+   as.integer(chnLen), as.integer(locDim), out = double(chnLen*locDim))$out,
+   nrow = chnLen, byrow = T)
> chn4 <- matrix(.C("GSLmatLoad",
+   "chains/BVout_trj_3_4.gbin",
+   as.integer(chnLen), as.integer(locDim), out = double(chnLen*locDim))$out,
+   nrow = chnLen, byrow = T)
> chn5 <- matrix(.C("GSLmatLoad",
+   "chains/BVout_trj_3_5.gbin",
+   as.integer(chnLen), as.integer(locDim), out = double(chnLen*locDim))$out,
+   nrow = chnLen, byrow = T)
> grMat <- matrix(gelRub("chn", nChn, chnLen), ncol = d, byrow = T)
> grFrame <- data.frame(Gelman.Rubin=c(grMat), trait=rep(trtNam, each = Nacc))
> grMaxInd <- apply(grMat, 2, function(vec){which(vec == max(vec))[1]})
> acMat <- mcmcAcf("chn", 5)
> acFrame <- data.frame(autocorrelation=c(acMat), trait=rep(trtNam, prod(dim(acMat))/2),
+   lag=rep(0:33, each = nrow(acMat)))
>
```

Plot the *aus* results.

```
> showtext_auto()
> ggplot(data=grFrame,
+   aes(x=trait, y=Gelman.Rubin)) +
+   geom_boxplot(fill="grey80") +
+   theme_classic(base_size=18, base_family="myriad")
>
```

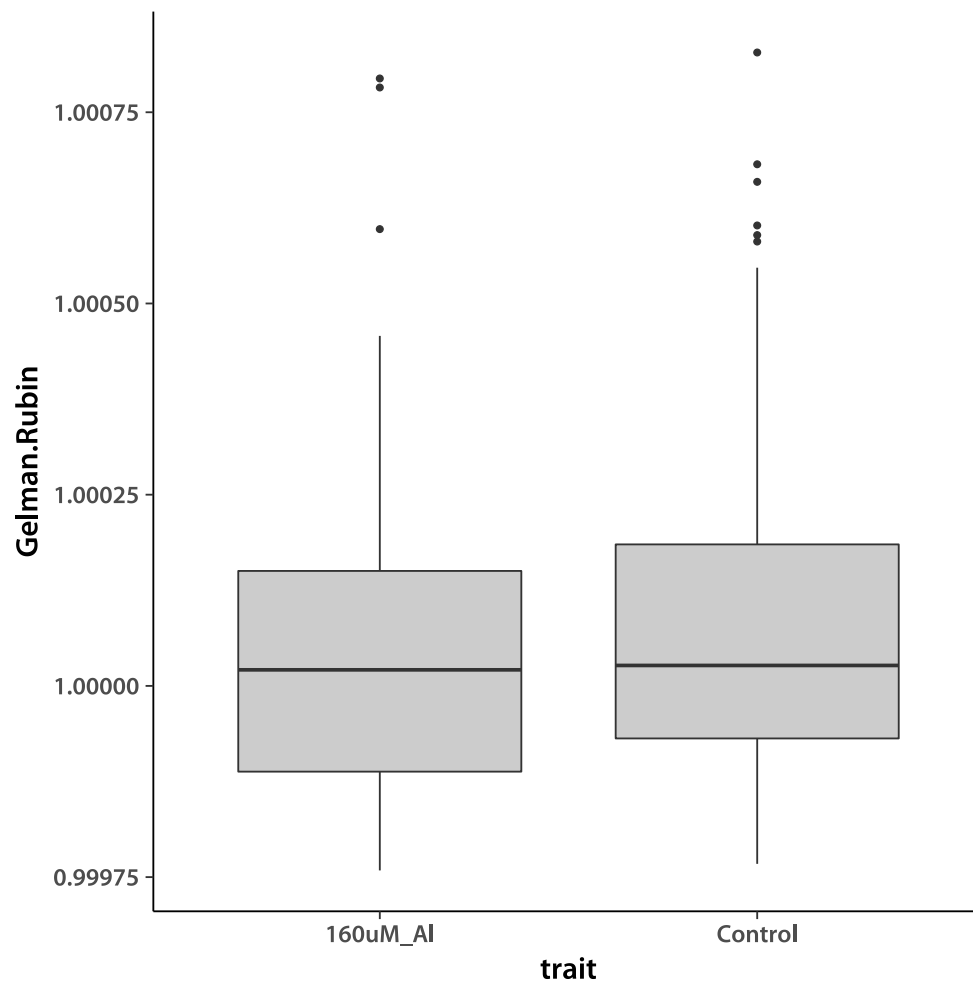

Values smaller than  $\sim 1.2$  indicate good convergence. I check by plotting an the chains with the worst G-R statistic for each trait.

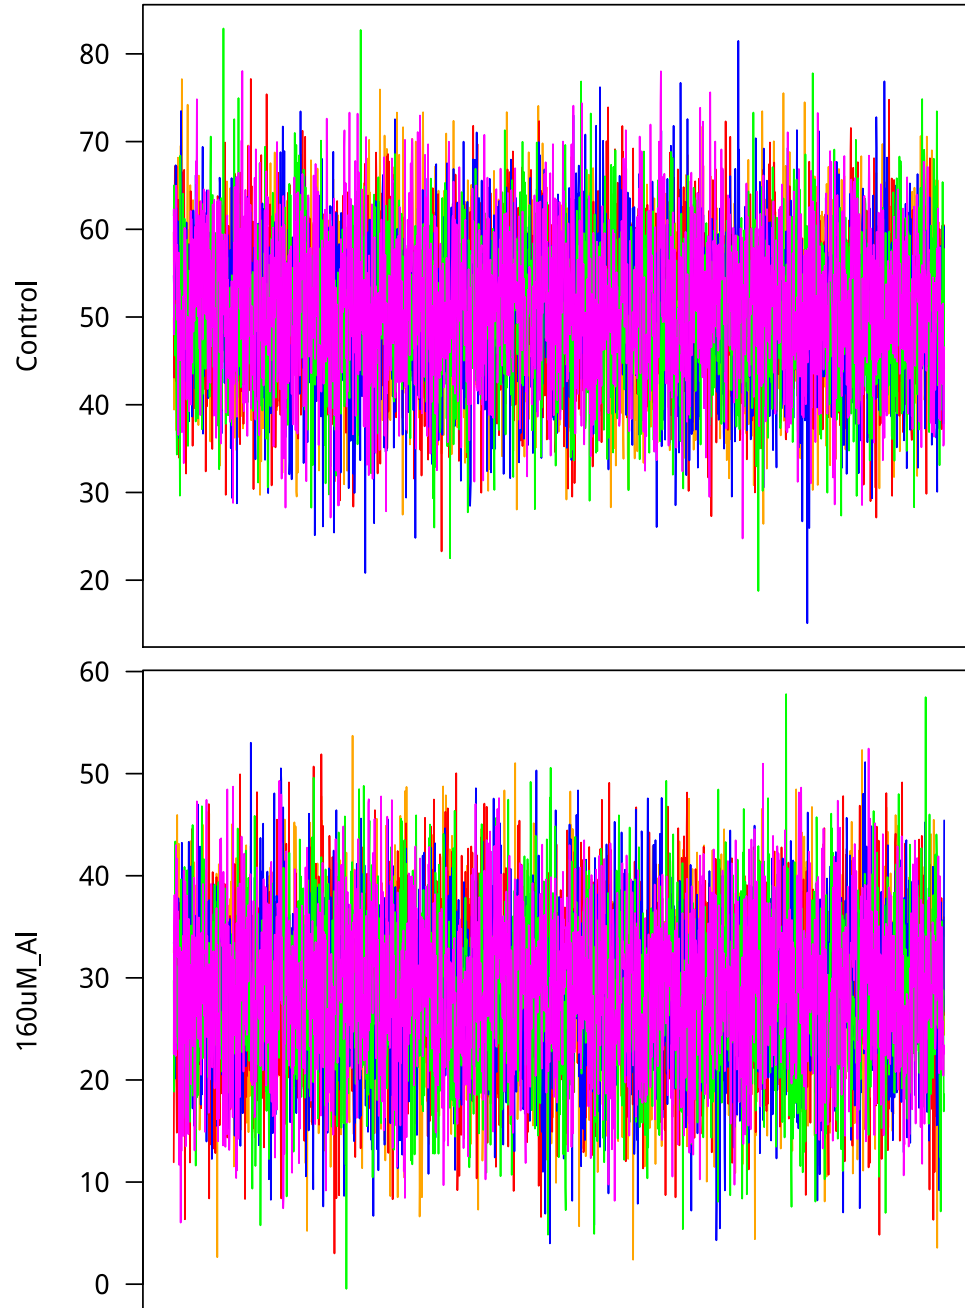

Now I look at mixing. Lag is on the  $x$  axis.

```
> ggTrt1 <- ggplot(data=subset(acFrame, trait==trtNam[1]),
+   aes(x=lag, y=autocorrelation)) +
+   geom_boxplot(fill="grey80", aes(group=cut_interval(lag, n=34))) +
+   theme_classic(base_size=18, base_family="myriad") +
+   labs(title=trtNam[1])
> ggTrt2 <- ggplot(data=subset(acFrame, trait==trtNam[2]),
```

```

+       aes(x=lag, y=autocorrelation)) +
+       geom_boxplot(fill="grey80", aes(group=cut_interval(lag, n=34))) +
+       theme_classic(base_size=18, base_family="myriad") +
+       labs(title=trtNam[2])
> showtext_auto()
> grid.arrange(ggTrt1, ggTrt2, nrow = 2)
>

```

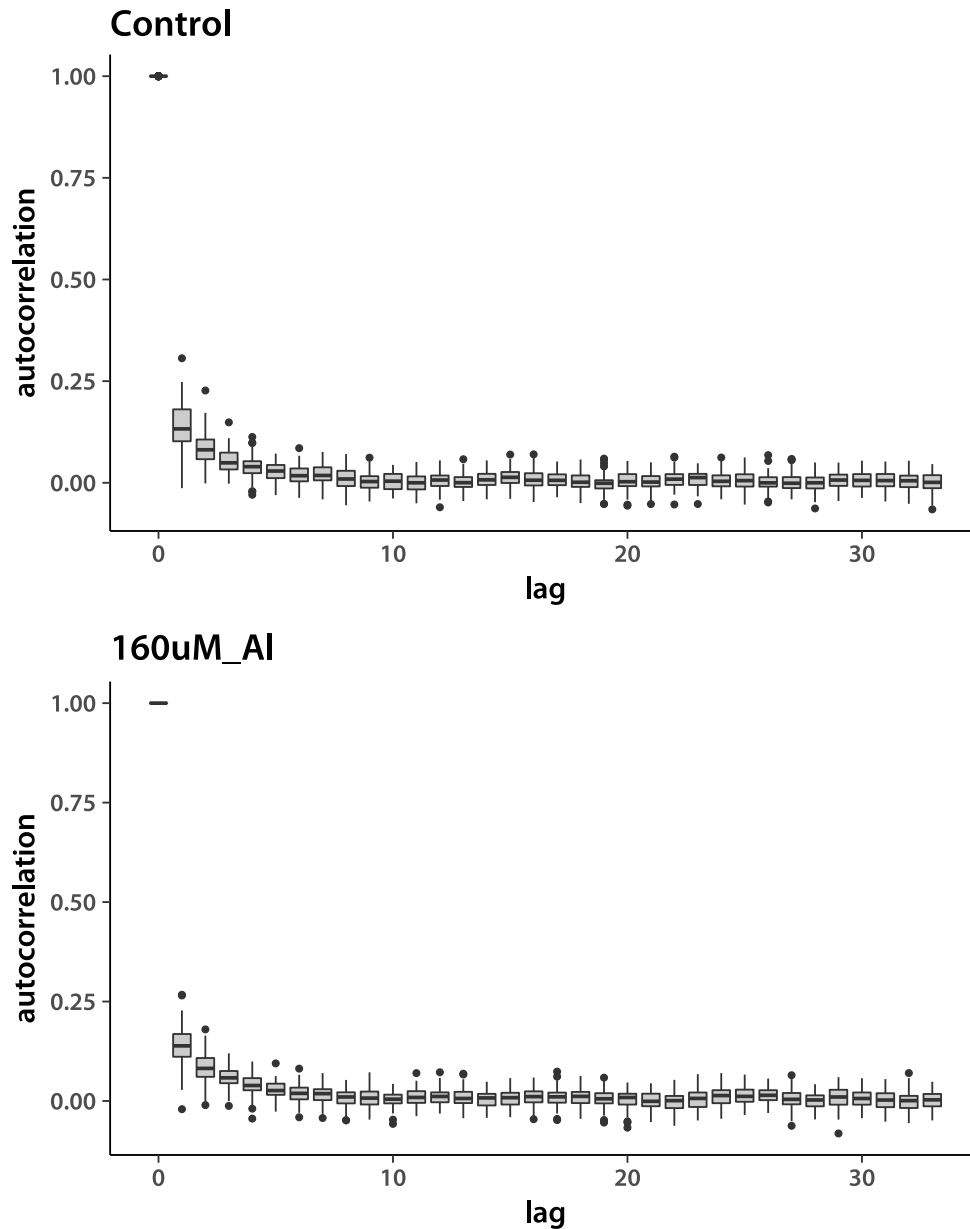

Next, admixed tropical *japonica*.

```
> Nacc <- 95
```

```
> locDim <- d*Nacc
> chn1 <- matrix(.C("GSLmatLoad",
+   "chains/BVout_trja_3_1.gbin",
+   as.integer(chnLen), as.integer(locDim), out = double(chnLen*locDim))$out,
+   nrow = chnLen, byrow = T)
> chn2 <- matrix(.C("GSLmatLoad",
+   "chains/BVout_trja_3_2.gbin",
+   as.integer(chnLen), as.integer(locDim), out = double(chnLen*locDim))$out,
+   nrow = chnLen, byrow = T)
> chn3 <- matrix(.C("GSLmatLoad",
+   "chains/BVout_trja_3_3.gbin",
+   as.integer(chnLen), as.integer(locDim), out = double(chnLen*locDim))$out,
+   nrow = chnLen, byrow = T)
> chn4 <- matrix(.C("GSLmatLoad",
+   "chains/BVout_trja_3_4.gbin",
+   as.integer(chnLen), as.integer(locDim), out = double(chnLen*locDim))$out,
+   nrow = chnLen, byrow = T)
> chn5 <- matrix(.C("GSLmatLoad",
+   "chains/BVout_trja_3_5.gbin",
+   as.integer(chnLen), as.integer(locDim), out = double(chnLen*locDim))$out,
+   nrow = chnLen, byrow = T)
> grMat <- matrix(gelRub("chn", nChn, chnLen), ncol = d, byrow = T)
> grFrame <- data.frame(Gelman.Rubin=c(grMat), trait=rep(trtNam, each = Nacc))
> grMaxInd <- apply(grMat, 2, function(vec){which(vec == max(vec))[1]})
> acMat <- mcmcAcf("chn", 5)
> acFrame <- data.frame(autocorrelation=c(acMat), trait=rep(trtNam, prod(dim(acMat))/2),
+   lag=rep(0:33, each = nrow(acMat)))
>
```

Plot the *aus* results.

```
> showtext_auto()
> ggplot(data=grFrame,
+   aes(x=trait, y=Gelman.Rubin)) +
+   geom_boxplot(fill="grey80") +
+   theme_classic(base_size=18, base_family="myriad")
>
```

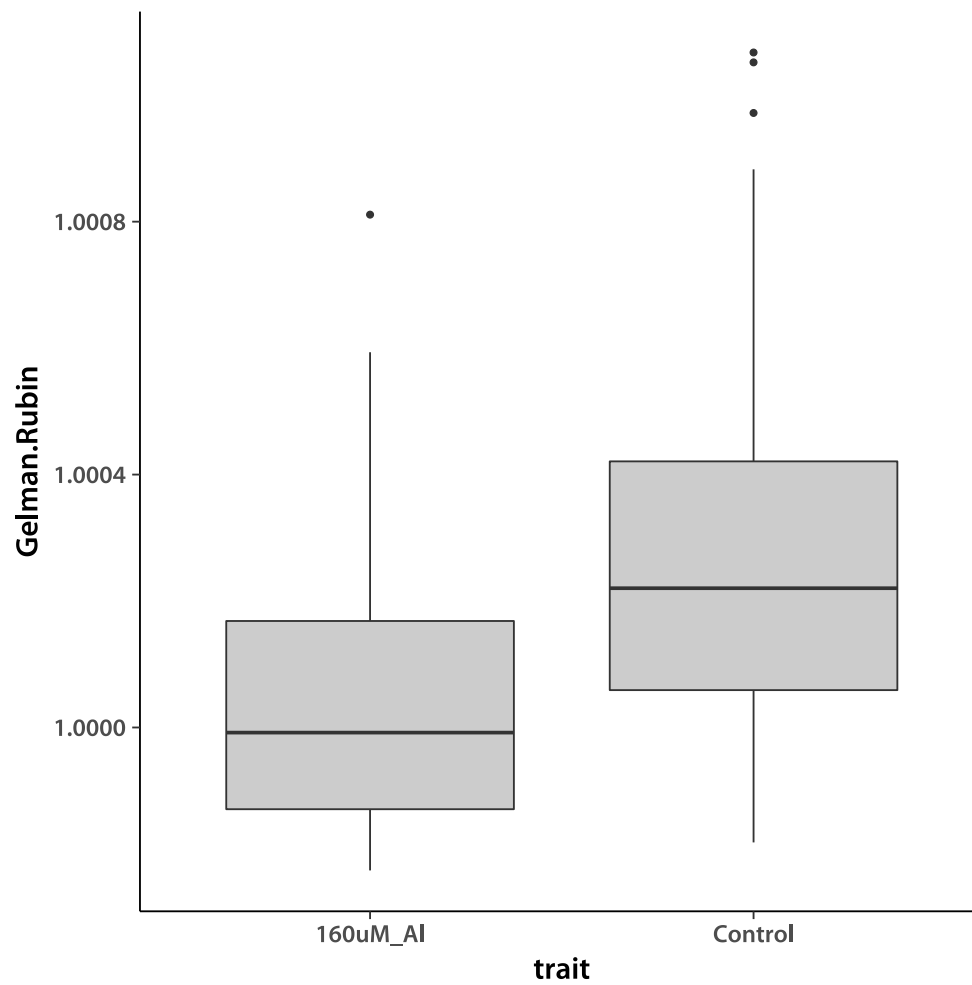

Values smaller than  $\sim 1.2$  indicate good convergence. I check by plotting an the chains with the worst G-R statistic for each trait.

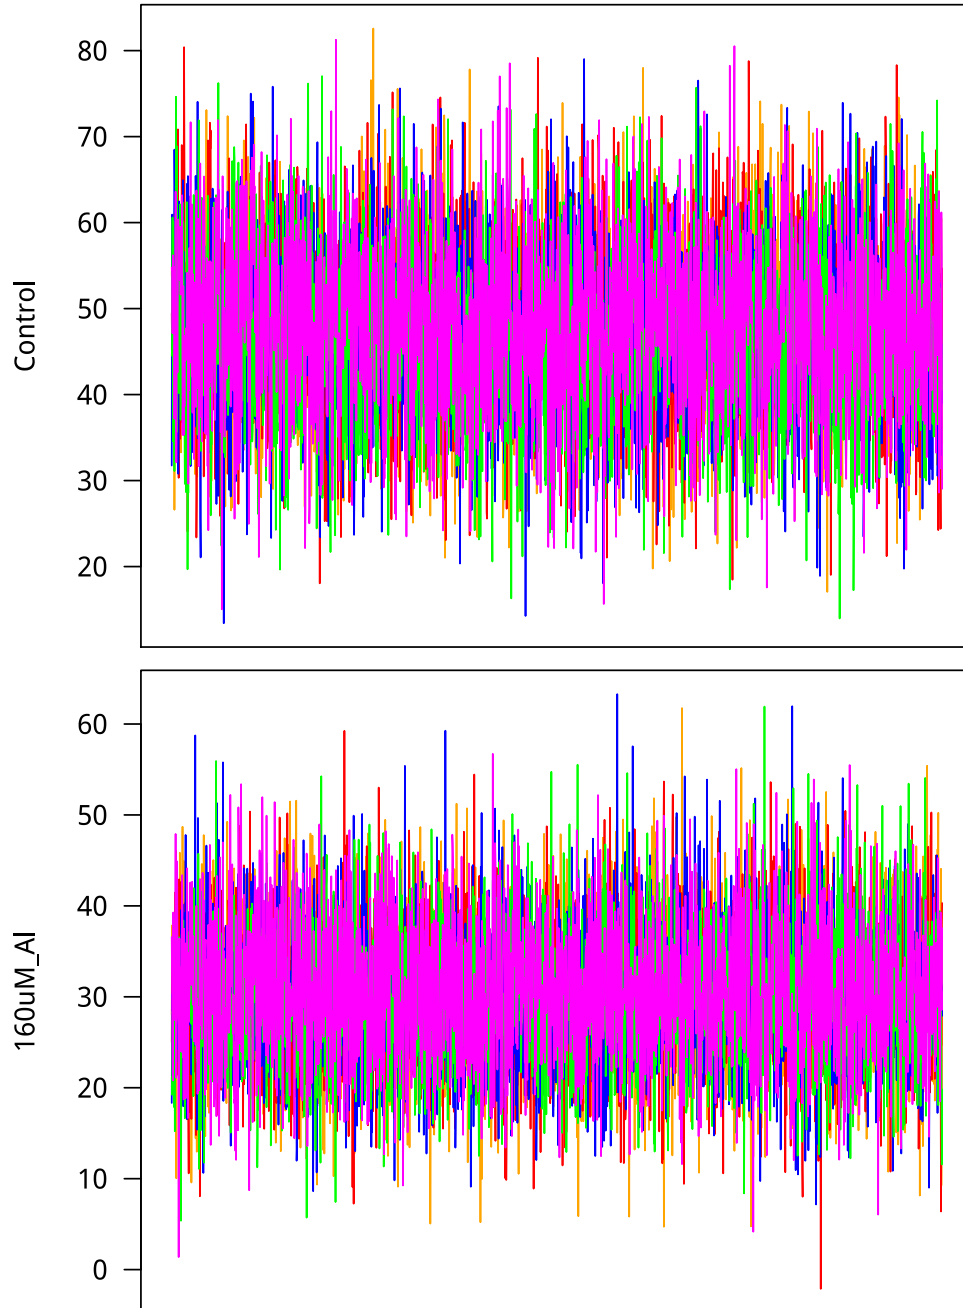

Now I look at mixing. Lag is on the  $x$  axis.

```
> ggTrt1 <- ggplot(data=subset(acFrame, trait==trtNam[1]),  
+   aes(x=l原因, y=autocorrelation)) +  
+   geom_boxplot(fill="grey80", aes(group=cut_interval(lag, n=34))) +  
+   theme_classic(base_size=18, base_family="myriad") +  
+   labs(title=trtNam[1])  
> ggTrt2 <- ggplot(data=subset(acFrame, trait==trtNam[2]),
```

```
+       aes(x=lag, y=autocorrelation)) +  
+       geom_boxplot(fill="grey80", aes(group=cut_interval(lag, n=34))) +  
+       theme_classic(base_size=18, base_family="myriad") +  
+       labs(title=trtNam[2])  
> showtext_auto()  
> grid.arrange(ggTrt1, ggTrt2, nrow = 2)  
>
```

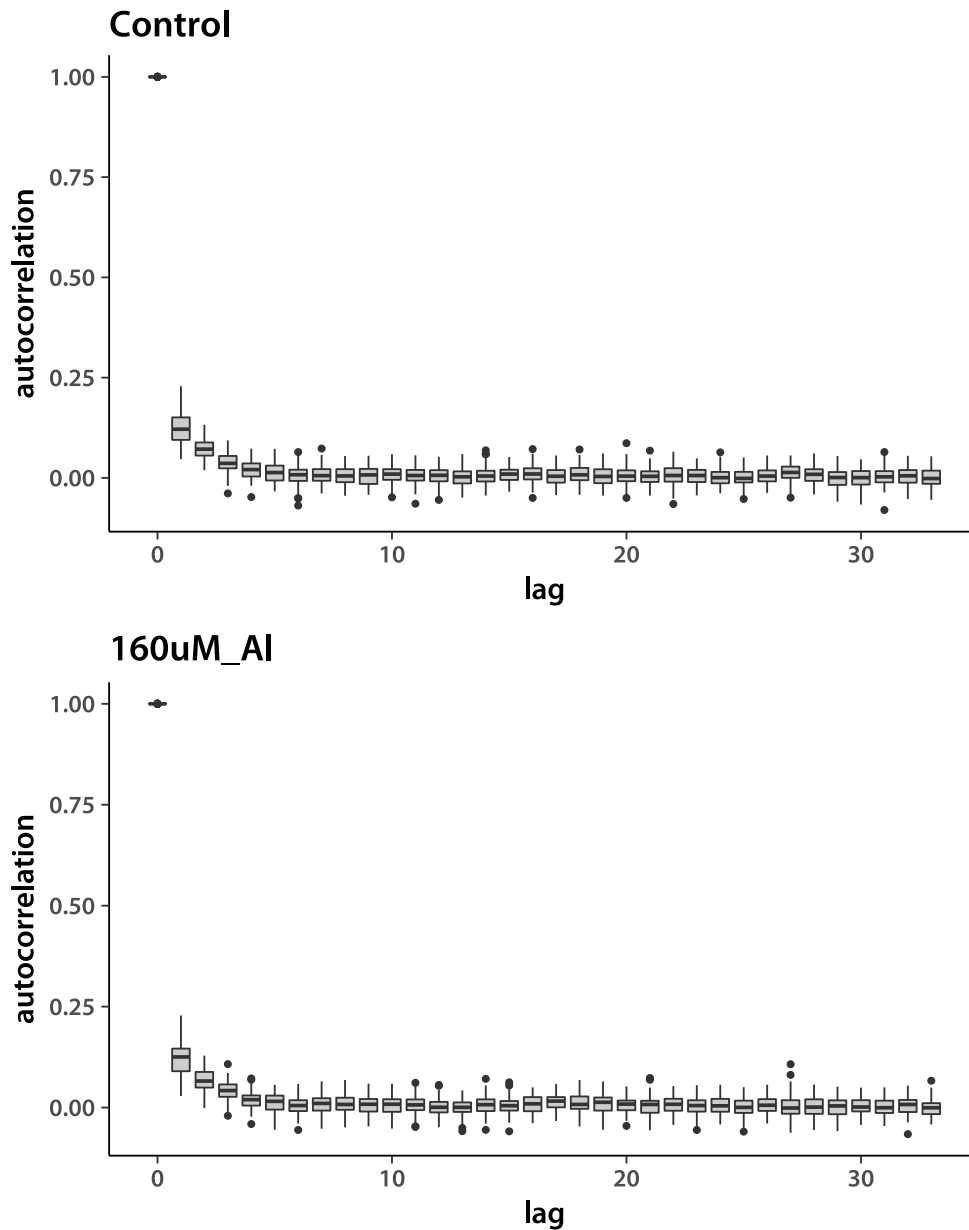

Finally, I look at covariance matrices. I create an index to isolate just the upper triangles. I again start with *aus*.

```
> upInd <- matrix(1:(d^2), ncol = d, byrow = T)
> upInd <- upInd[row(upInd) <= col(upInd)]
> diagInd <- diag(matrix(1:(d^2), ncol = d, byrow = T))
```

Read in covariance matrix chains. Error correlations are set to zero, I exclude them.

```
> chn1 <- matrix(.C("GSLmatLoad",
+   "chains/SgEout_aus_3_1.gbin",
+   as.integer(chnLen), as.integer(d^2), out = double(chnLen*d^2))$out,
+   nrow = chnLen, byrow = T)[,diagInd]
> chn1 <- cbind(chn1,
+   matrix(.C("GSLmatLoad",
+   "chains/SgSout_aus_3_1.gbin",
+   as.integer(chnLen), as.integer(d^2), out = double(chnLen*d^2))$out,
+   nrow = chnLen, byrow = T)[,upInd])
> chn1 <- cbind(chn1,
+   matrix(.C("GSLmatLoad",
+   "chains/SgAout_aus_3_1.gbin",
+   as.integer(chnLen), as.integer(d^2), out = double(chnLen*d^2))$out,
+   nrow = chnLen, byrow = T)[,upInd])
> chn2 <- matrix(.C("GSLmatLoad",
+   "chains/SgEout_aus_3_2.gbin",
+   as.integer(chnLen), as.integer(d^2), out = double(chnLen*d^2))$out,
+   nrow = chnLen, byrow = T)[,diagInd]
> chn2 <- cbind(chn2,
+   matrix(.C("GSLmatLoad",
+   "chains/SgSout_aus_3_2.gbin",
+   as.integer(chnLen), as.integer(d^2), out = double(chnLen*d^2))$out,
+   nrow = chnLen, byrow = T)[,upInd])
> chn2 <- cbind(chn2,
+   matrix(.C("GSLmatLoad",
+   "chains/SgAout_aus_3_2.gbin",
+   as.integer(chnLen), as.integer(d^2), out = double(chnLen*d^2))$out,
+   nrow = chnLen, byrow = T)[,upInd])
> chn3 <- matrix(.C("GSLmatLoad",
+   "chains/SgEout_aus_3_3.gbin",
+   as.integer(chnLen), as.integer(d^2), out = double(chnLen*d^2))$out,
+   nrow = chnLen, byrow = T)[,diagInd]
> chn3 <- cbind(chn3,
+   matrix(.C("GSLmatLoad",
+   "chains/SgSout_aus_3_3.gbin",
+   as.integer(chnLen), as.integer(d^2), out = double(chnLen*d^2))$out,
+   nrow = chnLen, byrow = T)[,upInd])
> chn3 <- cbind(chn3,
+   matrix(.C("GSLmatLoad",
+   "chains/SgAout_aus_3_3.gbin",
```

```

+   as.integer(chnLen), as.integer(d^2), out = double(chnLen*d^2))$out,
+   nrow = chnLen, byrow = T)[,upInd])
> chn4 <- matrix(.C("GSLmatLoad",
+   "chains/SgEout_aus_3_4.gbin",
+   as.integer(chnLen), as.integer(d^2), out = double(chnLen*d^2))$out,
+   nrow = chnLen, byrow = T)[,diagInd]
> chn4 <- cbind(chn4,
+   matrix(.C("GSLmatLoad",
+   "chains/SgSout_aus_3_4.gbin",
+   as.integer(chnLen), as.integer(d^2), out = double(chnLen*d^2))$out,
+   nrow = chnLen, byrow = T)[,upInd])
> chn4 <- cbind(chn4,
+   matrix(.C("GSLmatLoad",
+   "chains/SgAout_aus_3_4.gbin",
+   as.integer(chnLen), as.integer(d^2), out = double(chnLen*d^2))$out,
+   nrow = chnLen, byrow = T)[,upInd])
> chn5 <- matrix(.C("GSLmatLoad",
+   "chains/SgEout_aus_3_5.gbin",
+   as.integer(chnLen), as.integer(d^2), out = double(chnLen*d^2))$out,
+   nrow = chnLen, byrow = T)[,diagInd]
> chn5 <- cbind(chn5,
+   matrix(.C("GSLmatLoad",
+   "chains/SgSout_aus_3_5.gbin",
+   as.integer(chnLen), as.integer(d^2), out = double(chnLen*d^2))$out,
+   nrow = chnLen, byrow = T)[,upInd])
> chn5 <- cbind(chn5,
+   matrix(.C("GSLmatLoad",
+   "chains/SgAout_aus_3_5.gbin",
+   as.integer(chnLen), as.integer(d^2), out = double(chnLen*d^2))$out,
+   nrow = chnLen, byrow = T)[,upInd])
> acMat <- mcmcAcf("chn", 5)
> acFrame <- data.frame(autocorrelation=c(acMat),
+   Sigma=rep(c(rep("SgE", length(diagInd)),
+   rep(c("SgS", "SgA"), each=length(upInd))), ncol(acMat)),
+   lag=rep(0:33, each = nrow(acMat)))
> gelRub("chn", nChn, chnLen)

```

```
[1] 0.9999770 0.9999225 1.0004899 1.0001130 0.9998007 1.0001715 1.0005032 0.9999878
```

```

> ggSgE <- ggplot(data=subset(acFrame, Sigma=="SgE"),
+   aes(x=lag, y=autocorrelation)) +
+   geom_point() +
+   theme_classic(base_size=18, base_family="myriad") +
+   labs(title=expression(Sigma[e]))
> ggSgS <- ggplot(data=subset(acFrame, Sigma=="SgS"),

```

---

```
+       aes(x=lag, y=autocorrelation)) +
+     geom_point() +
+     theme_classic(base_size=18, base_family="myriad") +
+     labs(title=expression(Sigma[s]))
> ggSgA <- ggplot(data=subset(acFrame, Sigma=="SgA"),
+       aes(x=lag, y=autocorrelation)) +
+     geom_point() +
+     theme_classic(base_size=18, base_family="myriad") +
+     labs(title=expression(Sigma[a]))
> showtext_auto()
> grid.arrange(ggSgE, ggSgS, ggSgA, nrow = 3)
>
```

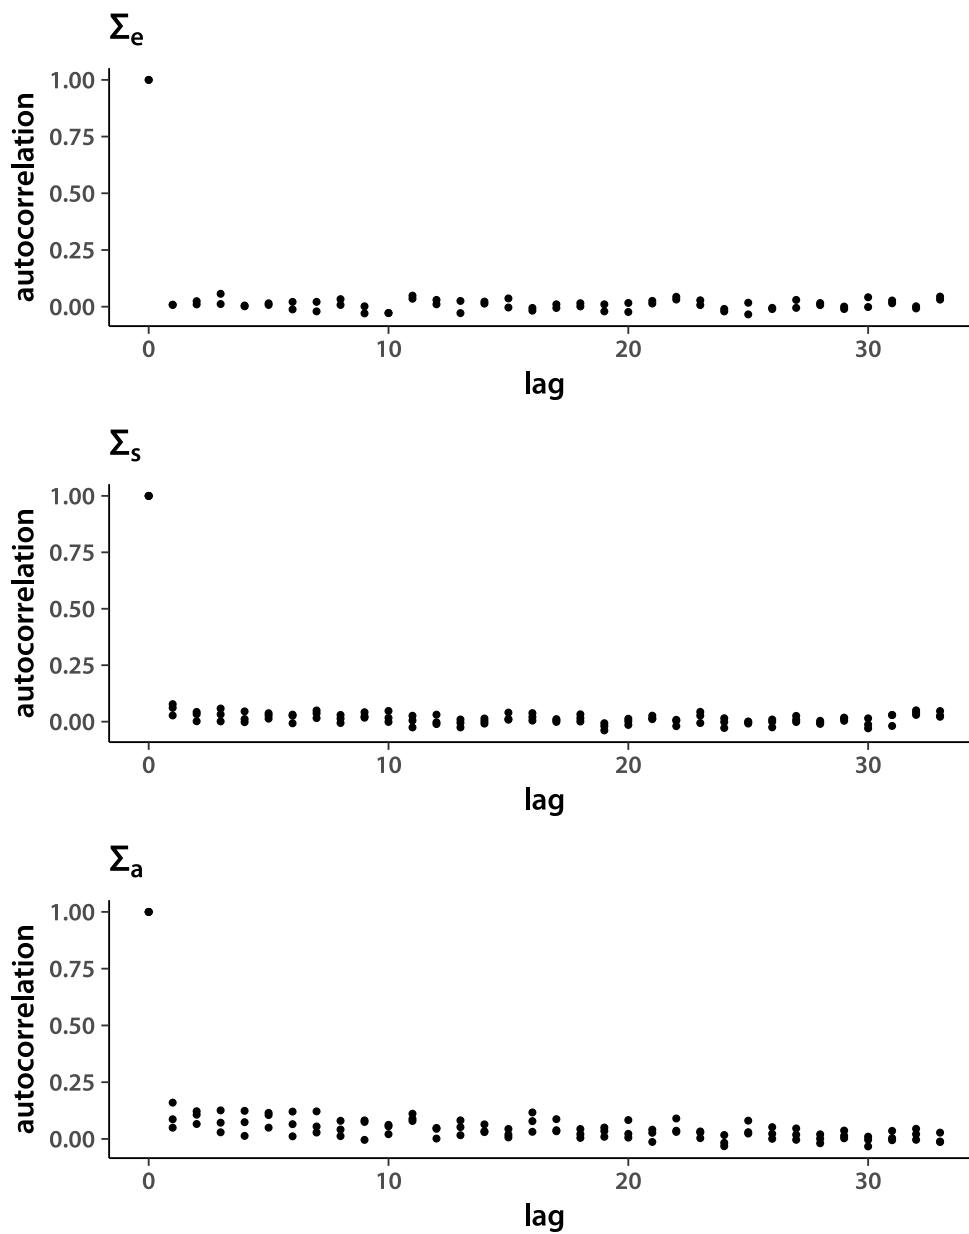

Plot variance chains. First, I get the diagonal index from the upper triangle index.

```
> diagList <- list(1:d, c(3,5), c(6,8))
```

$\Sigma_e$ :

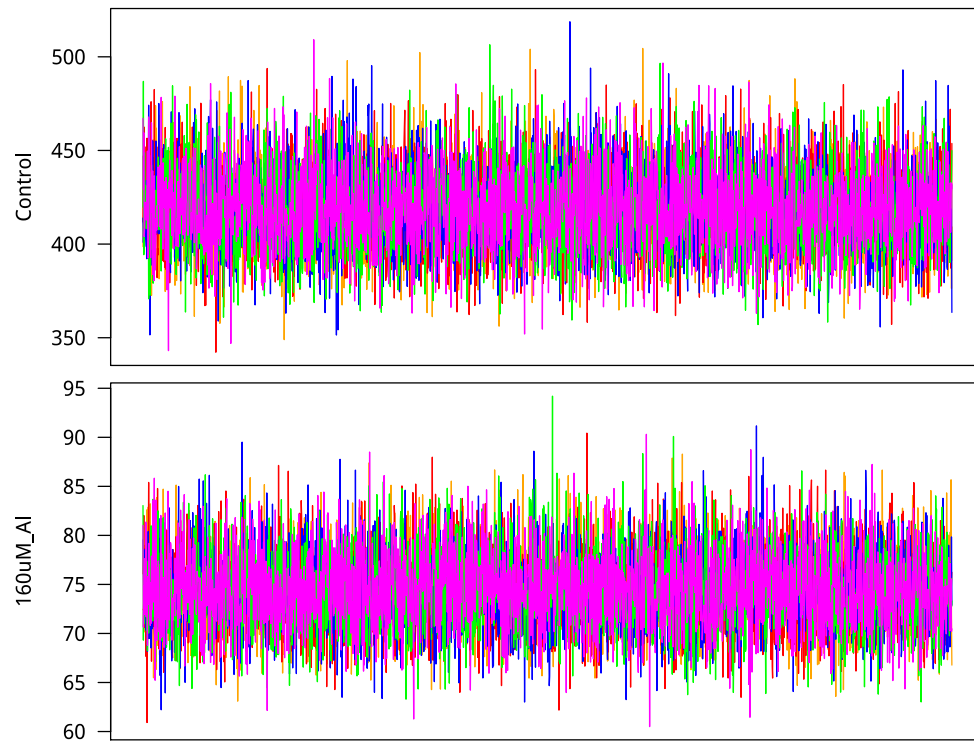

Next, non-additive genetic variances.

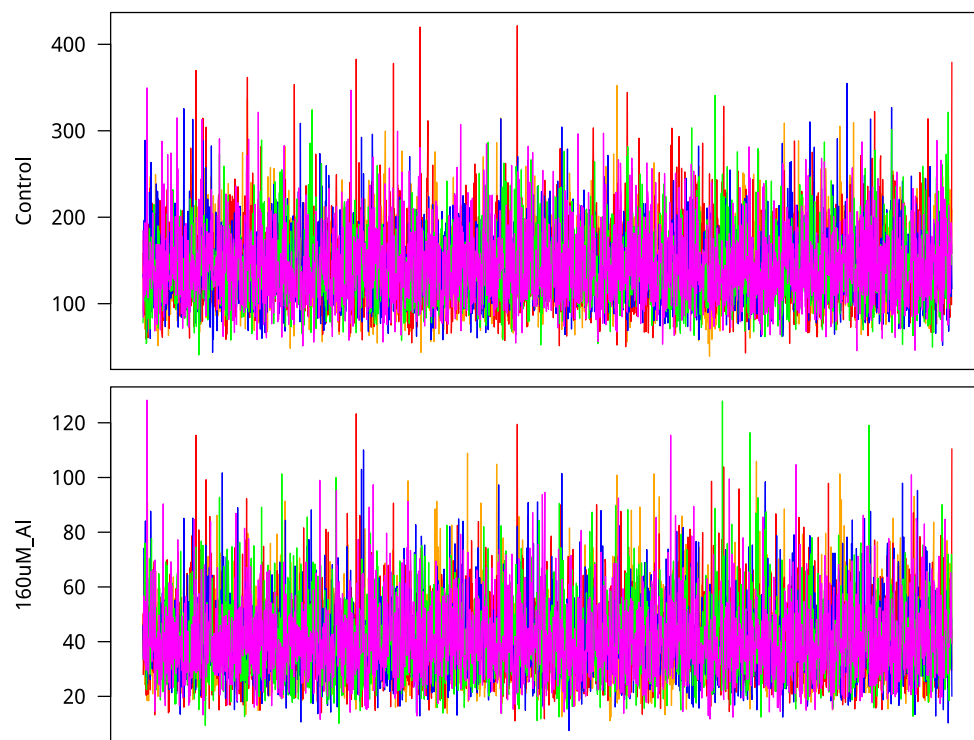

Finally,  $\Sigma_a$  which can not be interpreted as the additive genetic covariance matrix in this case, where  $\nu_g = 3$  and the model is Student- $t$ .

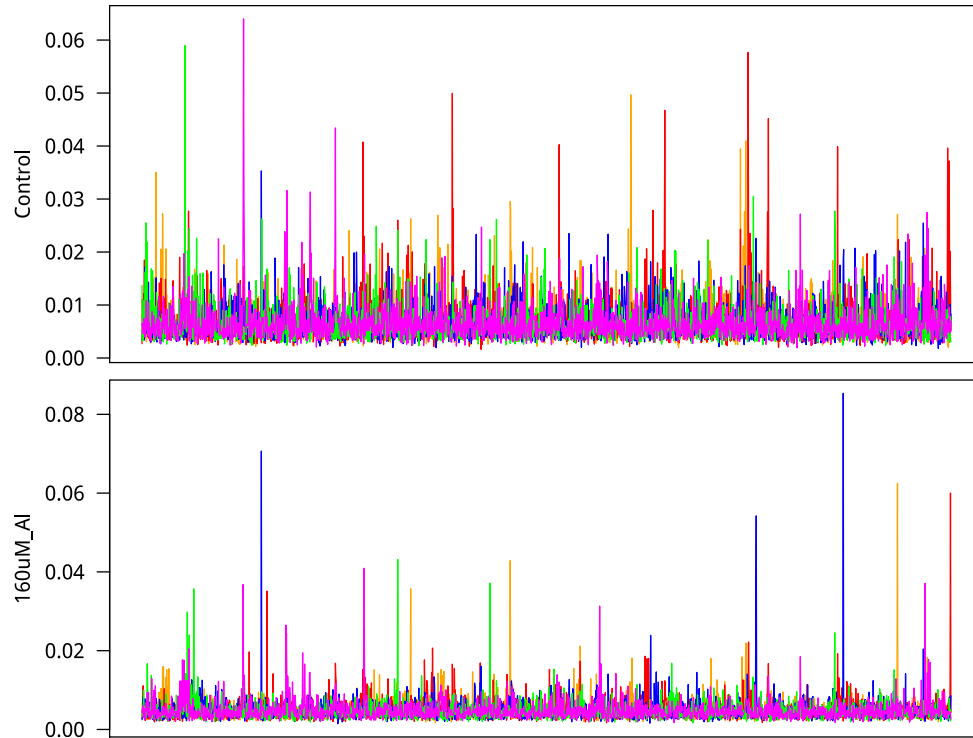

Everything looks good and I move on to the tropical *japonica* covariances.

```
> chn1 <- matrix(.C("GSLmatLoad",
+   "chains/SgEout_trj_3_1.gbin",
+   as.integer(chnLen), as.integer(d^2), out = double(chnLen*d^2))$out,
+   nrow = chnLen, byrow = T)[,diagInd]
> chn1 <- cbind(chn1,
+   matrix(.C("GSLmatLoad",
+   "chains/SgSout_trj_3_1.gbin",
+   as.integer(chnLen), as.integer(d^2), out = double(chnLen*d^2))$out,
+   nrow = chnLen, byrow = T)[,upInd])
> chn1 <- cbind(chn1,
+   matrix(.C("GSLmatLoad",
+   "chains/SgAout_trj_3_1.gbin",
+   as.integer(chnLen), as.integer(d^2), out = double(chnLen*d^2))$out,
+   nrow = chnLen, byrow = T)[,upInd])
> chn2 <- matrix(.C("GSLmatLoad",
+   "chains/SgEout_trj_3_2.gbin",
+   as.integer(chnLen), as.integer(d^2), out = double(chnLen*d^2))$out,
+   nrow = chnLen, byrow = T)[,diagInd]
> chn2 <- cbind(chn2,
```

```
+     matrix(.C("GSLmatLoad",
+       "chains/SgSout_trj_3_2.gbin",
+       as.integer(chnLen), as.integer(d^2), out = double(chnLen*d^2))$out,
+       nrow = chnLen, byrow = T)[,upInd])
> chn2 <- cbind(chn2,
+   matrix(.C("GSLmatLoad",
+     "chains/SgAout_trj_3_2.gbin",
+     as.integer(chnLen), as.integer(d^2), out = double(chnLen*d^2))$out,
+     nrow = chnLen, byrow = T)[,upInd])
> chn3 <- matrix(.C("GSLmatLoad",
+   "chains/SgEout_trj_3_3.gbin",
+   as.integer(chnLen), as.integer(d^2), out = double(chnLen*d^2))$out,
+   nrow = chnLen, byrow = T)[,diagInd]
> chn3 <- cbind(chn3,
+   matrix(.C("GSLmatLoad",
+     "chains/SgSout_trj_3_3.gbin",
+     as.integer(chnLen), as.integer(d^2), out = double(chnLen*d^2))$out,
+     nrow = chnLen, byrow = T)[,upInd])
> chn3 <- cbind(chn3,
+   matrix(.C("GSLmatLoad",
+     "chains/SgAout_trj_3_3.gbin",
+     as.integer(chnLen), as.integer(d^2), out = double(chnLen*d^2))$out,
+     nrow = chnLen, byrow = T)[,upInd])
> chn4 <- matrix(.C("GSLmatLoad",
+   "chains/SgEout_trj_3_4.gbin",
+   as.integer(chnLen), as.integer(d^2), out = double(chnLen*d^2))$out,
+   nrow = chnLen, byrow = T)[,diagInd]
> chn4 <- cbind(chn4,
+   matrix(.C("GSLmatLoad",
+     "chains/SgSout_trj_3_4.gbin",
+     as.integer(chnLen), as.integer(d^2), out = double(chnLen*d^2))$out,
+     nrow = chnLen, byrow = T)[,upInd])
> chn4 <- cbind(chn4,
+   matrix(.C("GSLmatLoad",
+     "chains/SgAout_trj_3_4.gbin",
+     as.integer(chnLen), as.integer(d^2), out = double(chnLen*d^2))$out,
+     nrow = chnLen, byrow = T)[,upInd])
> chn5 <- matrix(.C("GSLmatLoad",
+   "chains/SgEout_trj_3_5.gbin",
+   as.integer(chnLen), as.integer(d^2), out = double(chnLen*d^2))$out,
+   nrow = chnLen, byrow = T)[,diagInd]
> chn5 <- cbind(chn5,
+   matrix(.C("GSLmatLoad",
+     "chains/SgSout_trj_3_5.gbin",
+     as.integer(chnLen), as.integer(d^2), out = double(chnLen*d^2))$out,
```

```

+       nrow = chnLen, byrow = T)[,upInd])
> chn5 <- cbind(chn5,
+   matrix(.C("GSLmatLoad",
+   "chains/SgAout_trj_3_5.gbin",
+   as.integer(chnLen), as.integer(d^2), out = double(chnLen*d^2))$out,
+   nrow = chnLen, byrow = T)[,upInd])
> acMat <- mcmcAcf("chn", 5)
> acFrame <- data.frame(autocorrelation=c(acMat),
+   Sigma=rep(c(rep("SgE", length(diagInd)),
+   rep(c("SgS", "SgA"), each=length(upInd)))), ncol(acMat)),
+   lag=rep(0:33, each = nrow(acMat)))
> gelRub("chn", nChn, chnLen)

[1] 0.9999211 1.0000121 1.0005728 1.0005353 1.0004180 0.9998886 0.9997742 0.9997981

> ggSgE <- ggplot(data=subset(acFrame, Sigma=="SgE"),
+   aes(x=lag, y=autocorrelation)) +
+   geom_point() +
+   theme_classic(base_size=18, base_family="myriad") +
+   labs(title=expression(Sigma[e]))
> ggSgS <- ggplot(data=subset(acFrame, Sigma=="SgS"),
+   aes(x=lag, y=autocorrelation)) +
+   geom_point() +
+   theme_classic(base_size=18, base_family="myriad") +
+   labs(title=expression(Sigma[s]))
> ggSgA <- ggplot(data=subset(acFrame, Sigma=="SgA"),
+   aes(x=lag, y=autocorrelation)) +
+   geom_point() +
+   theme_classic(base_size=18, base_family="myriad") +
+   labs(title=expression(Sigma[a]))
> showtext_auto()
> grid.arrange(ggSgE, ggSgS, ggSgA, nrow = 3)
>

```

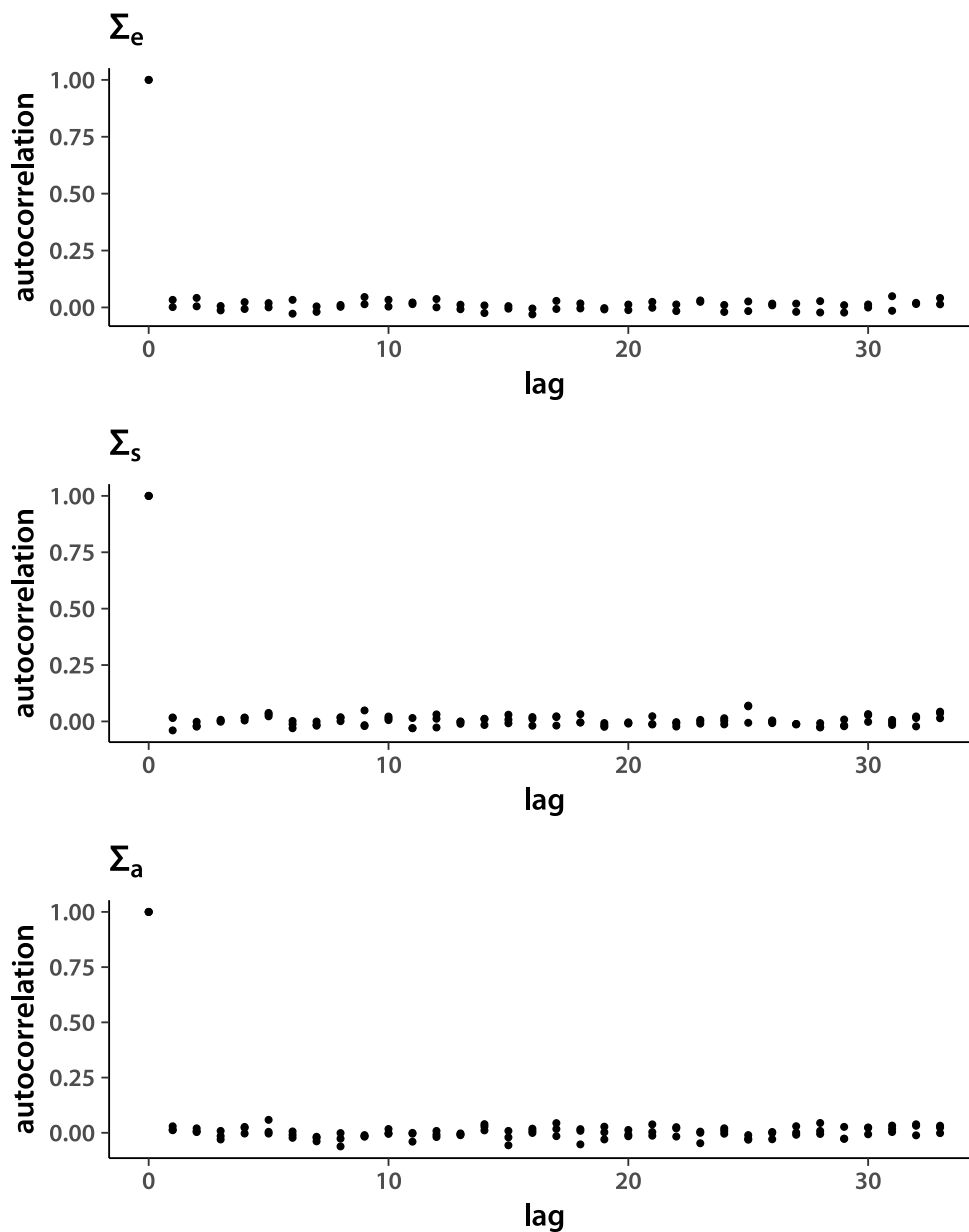

Plot variance chains. First, I get the diagonal index from the upper triangle index.

```
> diagList <- list(1:d, c(3,5), c(6,8))
```

$\Sigma_e$ :

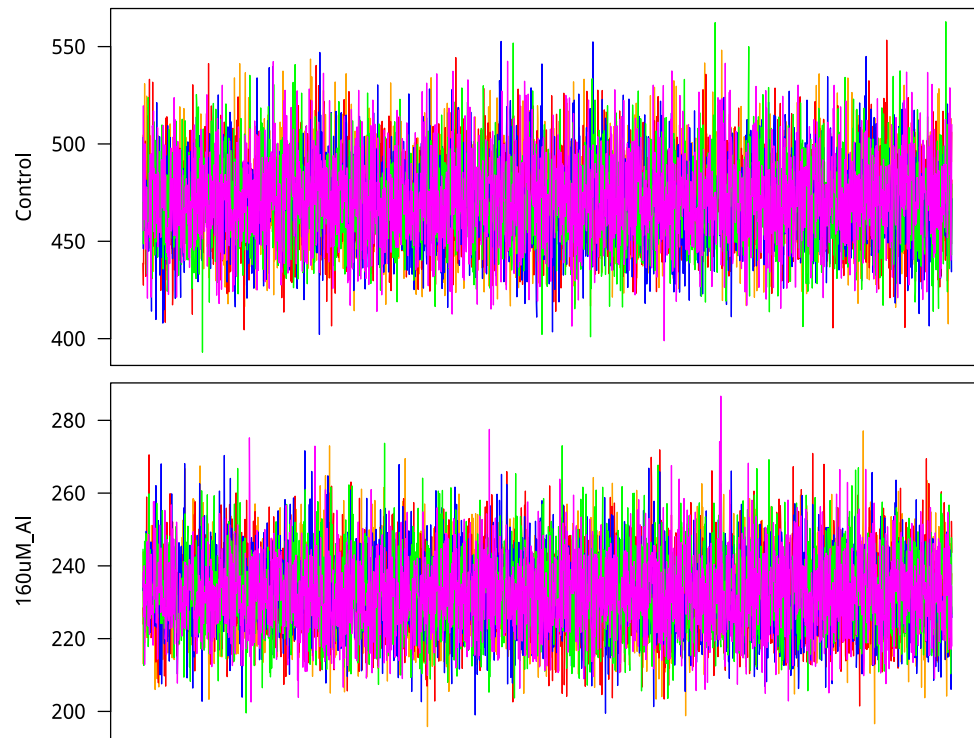

Next, non-additive genetic variances.

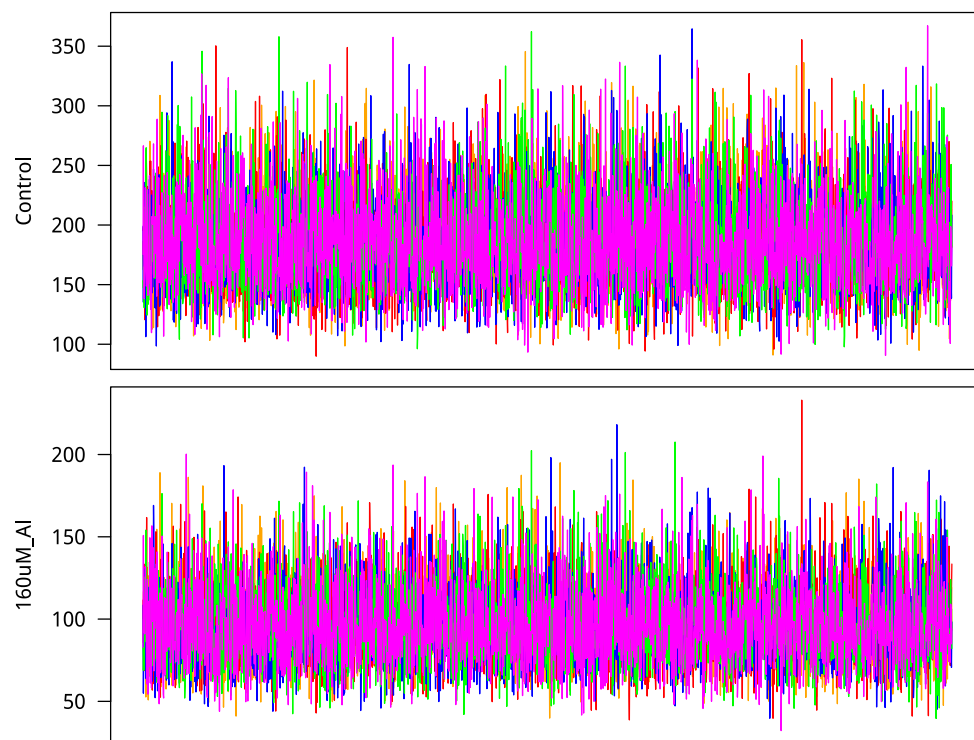

Finally,  $\Sigma_a$  which can not be interpreted as the additive genetic covariance matrix in this case, where  $\nu_g = 3$  and the model is Student- $t$ .

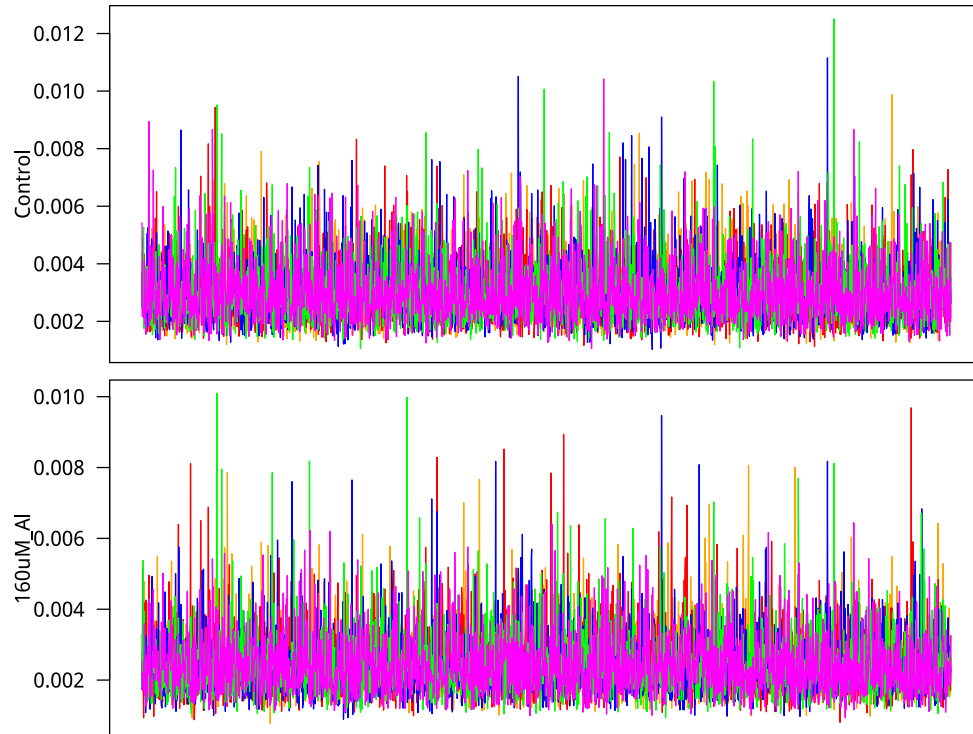

Finally, admixed tropical *japonica* covariances.

```
> chn1 <- matrix(.C("GSLmatLoad",
+   "chains/SgEout_trja_3_1.gbin",
+   as.integer(chnLen), as.integer(d^2), out = double(chnLen*d^2))$out,
+   nrow = chnLen, byrow = T)[,diagInd]
> chn1 <- cbind(chn1,
+   matrix(.C("GSLmatLoad",
+   "chains/SgSout_trja_3_1.gbin",
+   as.integer(chnLen), as.integer(d^2), out = double(chnLen*d^2))$out,
+   nrow = chnLen, byrow = T)[,upInd])
> chn1 <- cbind(chn1,
+   matrix(.C("GSLmatLoad",
+   "chains/SgAout_trja_3_1.gbin",
+   as.integer(chnLen), as.integer(d^2), out = double(chnLen*d^2))$out,
+   nrow = chnLen, byrow = T)[,upInd])
> chn2 <- matrix(.C("GSLmatLoad",
+   "chains/SgEout_trja_3_2.gbin",
+   as.integer(chnLen), as.integer(d^2), out = double(chnLen*d^2))$out,
+   nrow = chnLen, byrow = T)[,diagInd]
> chn2 <- cbind(chn2,
```

```
+     matrix(.C("GSLmatLoad",
+       "chains/SgSout_trja_3_2.gbin",
+       as.integer(chnLen), as.integer(d^2), out = double(chnLen*d^2))$out,
+       nrow = chnLen, byrow = T)[,upInd])
> chn2 <- cbind(chn2,
+   matrix(.C("GSLmatLoad",
+     "chains/SgAout_trja_3_2.gbin",
+     as.integer(chnLen), as.integer(d^2), out = double(chnLen*d^2))$out,
+     nrow = chnLen, byrow = T)[,upInd])
> chn3 <- matrix(.C("GSLmatLoad",
+   "chains/SgEout_trja_3_3.gbin",
+   as.integer(chnLen), as.integer(d^2), out = double(chnLen*d^2))$out,
+   nrow = chnLen, byrow = T)[,diagInd]
> chn3 <- cbind(chn3,
+   matrix(.C("GSLmatLoad",
+     "chains/SgSout_trja_3_3.gbin",
+     as.integer(chnLen), as.integer(d^2), out = double(chnLen*d^2))$out,
+     nrow = chnLen, byrow = T)[,upInd])
> chn3 <- cbind(chn3,
+   matrix(.C("GSLmatLoad",
+     "chains/SgAout_trja_3_3.gbin",
+     as.integer(chnLen), as.integer(d^2), out = double(chnLen*d^2))$out,
+     nrow = chnLen, byrow = T)[,upInd])
> chn4 <- matrix(.C("GSLmatLoad",
+   "chains/SgEout_trja_3_4.gbin",
+   as.integer(chnLen), as.integer(d^2), out = double(chnLen*d^2))$out,
+   nrow = chnLen, byrow = T)[,diagInd]
> chn4 <- cbind(chn4,
+   matrix(.C("GSLmatLoad",
+     "chains/SgSout_trja_3_4.gbin",
+     as.integer(chnLen), as.integer(d^2), out = double(chnLen*d^2))$out,
+     nrow = chnLen, byrow = T)[,upInd])
> chn4 <- cbind(chn4,
+   matrix(.C("GSLmatLoad",
+     "chains/SgAout_trja_3_4.gbin",
+     as.integer(chnLen), as.integer(d^2), out = double(chnLen*d^2))$out,
+     nrow = chnLen, byrow = T)[,upInd])
> chn5 <- matrix(.C("GSLmatLoad",
+   "chains/SgEout_trja_3_5.gbin",
+   as.integer(chnLen), as.integer(d^2), out = double(chnLen*d^2))$out,
+   nrow = chnLen, byrow = T)[,diagInd]
> chn5 <- cbind(chn5,
+   matrix(.C("GSLmatLoad",
+     "chains/SgSout_trja_3_5.gbin",
+     as.integer(chnLen), as.integer(d^2), out = double(chnLen*d^2))$out,
```

```

+       nrow = chnLen, byrow = T)[,upInd])
> chn5 <- cbind(chn5,
+   matrix(.C("GSLmatLoad",
+     "chains/SgAout_trja_3_5.gbin",
+     as.integer(chnLen), as.integer(d^2), out = double(chnLen*d^2))$out,
+     nrow = chnLen, byrow = T)[,upInd])
> acMat <- mcmcAcf("chn", 5)
> acFrame <- data.frame(autocorrelation=c(acMat),
+   Sigma=rep(c(rep("SgE", length(diagInd)),
+     rep(c("SgS", "SgA"), each=length(upInd)))), ncol(acMat)),
+   lag=rep(0:33, each = nrow(acMat)))
> gelRub("chn", nChn, chnLen)

[1] 0.9999800 0.9998059 0.9999920 1.0001017 1.0002182 0.9998683 0.9997681 0.9998172

> ggSgE <- ggplot(data=subset(acFrame, Sigma=="SgE"),
+   aes(x=lag, y=autocorrelation)) +
+   geom_point() +
+   theme_classic(base_size=18, base_family="myriad") +
+   labs(title=expression(Sigma[e]))
> ggSgS <- ggplot(data=subset(acFrame, Sigma=="SgS"),
+   aes(x=lag, y=autocorrelation)) +
+   geom_point() +
+   theme_classic(base_size=18, base_family="myriad") +
+   labs(title=expression(Sigma[s]))
> ggSgA <- ggplot(data=subset(acFrame, Sigma=="SgA"),
+   aes(x=lag, y=autocorrelation)) +
+   geom_point() +
+   theme_classic(base_size=18, base_family="myriad") +
+   labs(title=expression(Sigma[a]))
> showtext_auto()
> grid.arrange(ggSgE, ggSgS, ggSgA, nrow = 3)
>

```

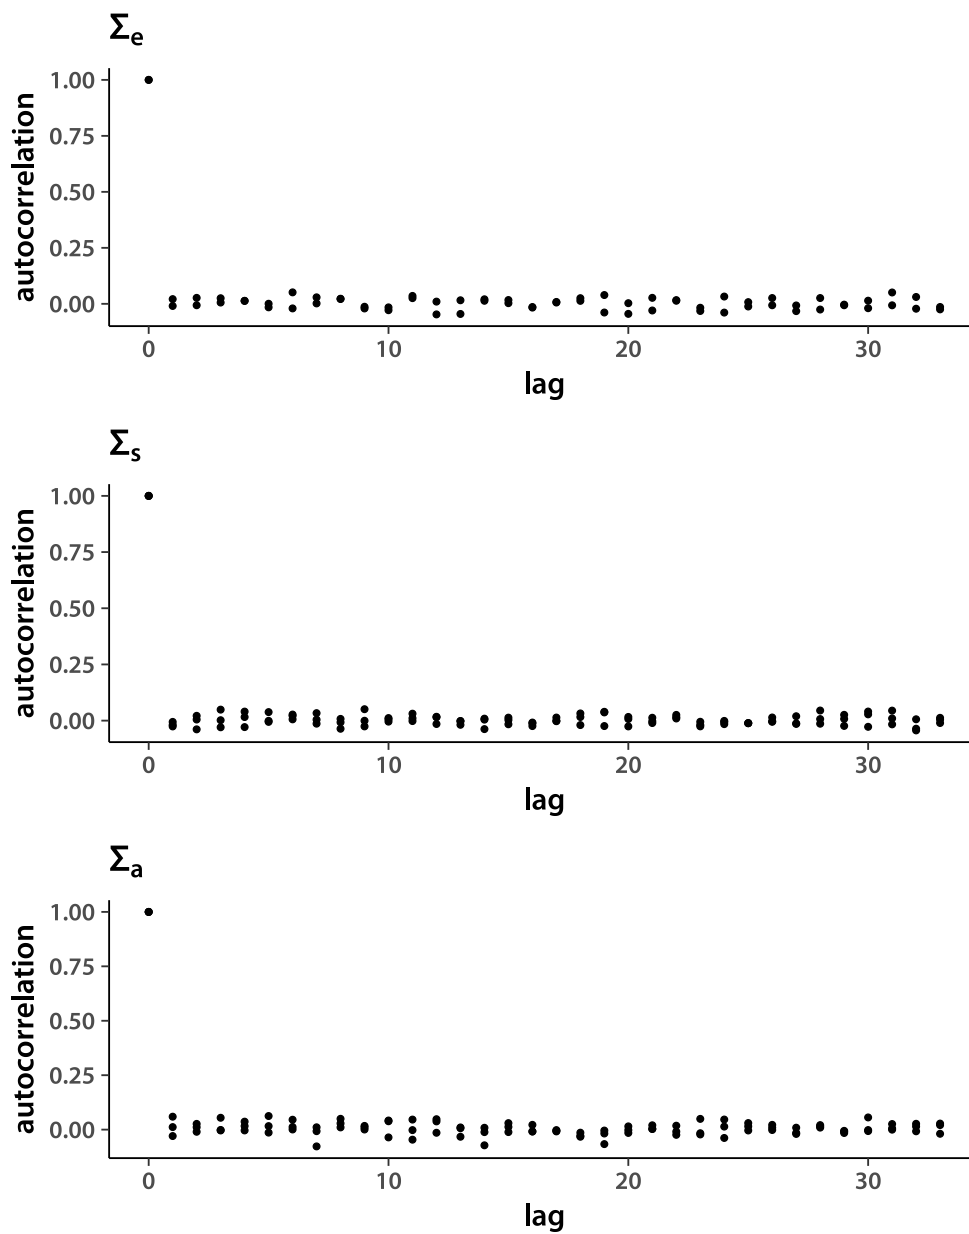

Plot variance chains. First, I get the diagonal index from the upper triangle index.

```
> diagList <- list(1:d, c(3,5), c(6,8))
```

$\Sigma_e$ :

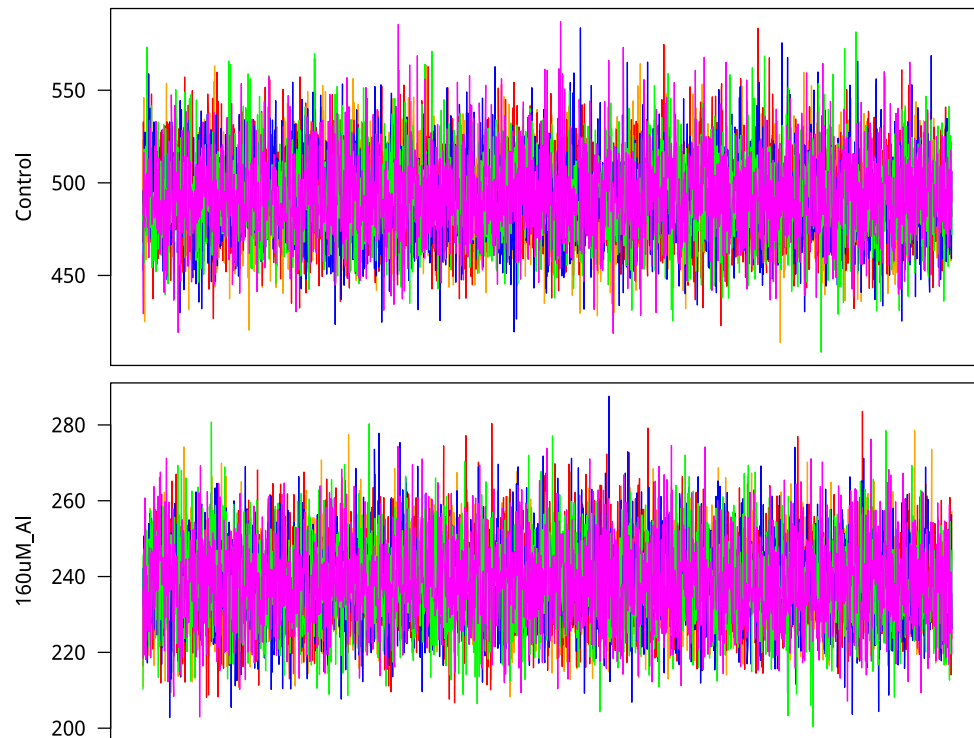

Next, non-additive genetic variances.

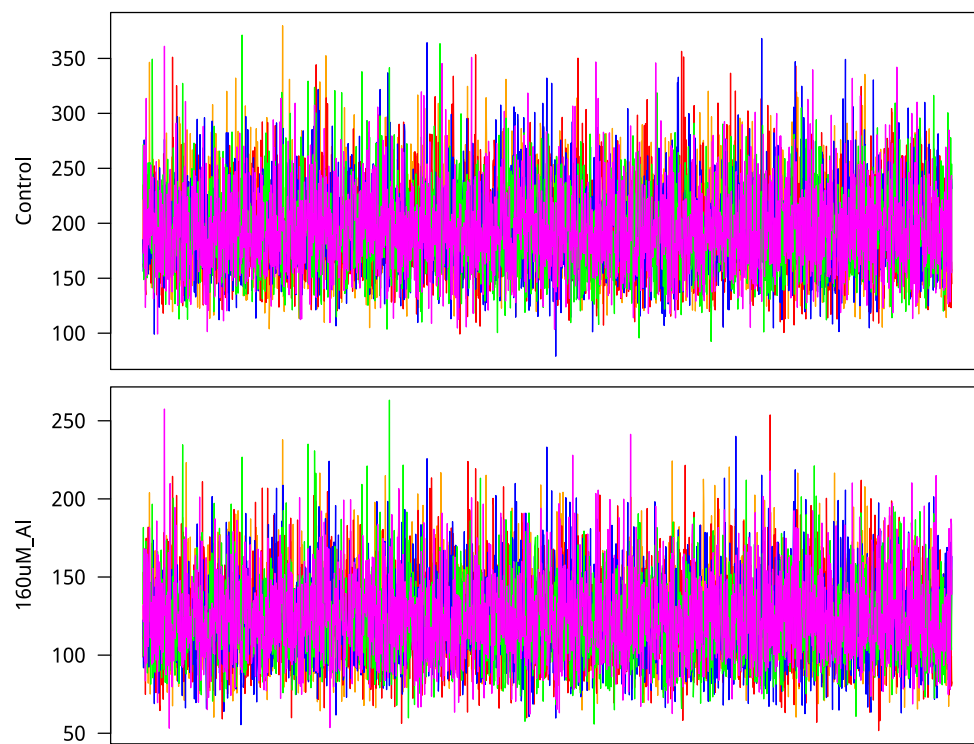

Finally,  $\Sigma_a$  which can not be interpreted as the additive genetic covariance matrix in this case, where  $\nu_g = 3$  and the model is Student- $t$ .

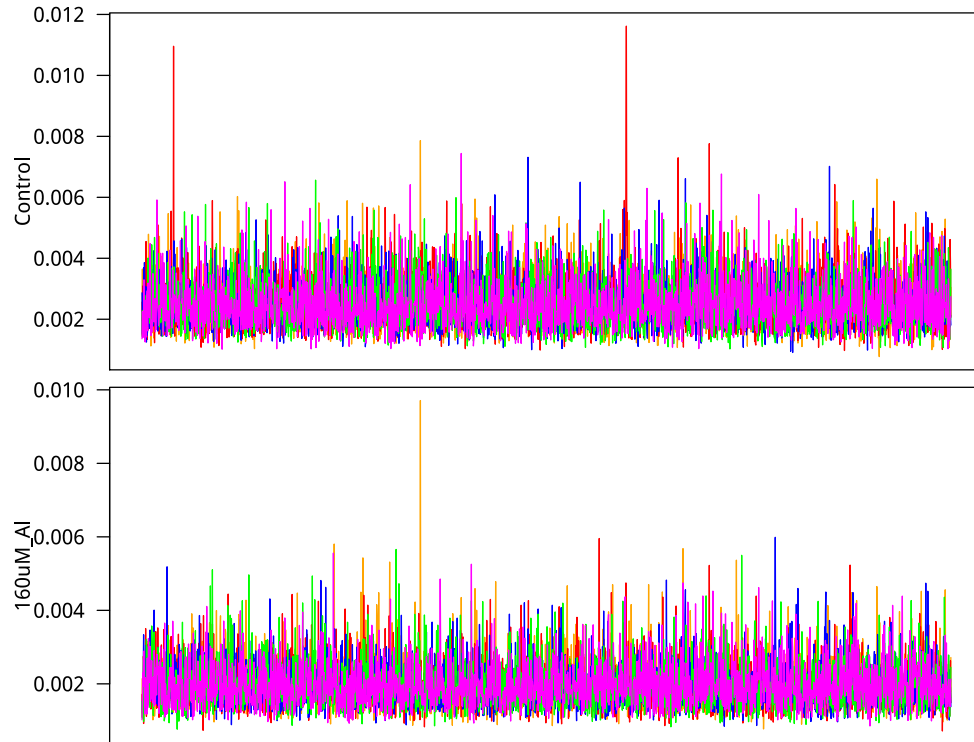

Supplement: Supplementary file 7 [file 1]
