# Supplementary material
Source: publisher figshare collection journal article supplement (https://gsajournals.figshare.com/articles/dataset/_/10321538)
Supplement: Supplementary file 6 [file 1]

# Preparing and checking raw data

Tony Greenberg

December 22, 2018

```
R version 3.5.1 (2018-07-02)
Platform: x86_64-pc-linux-gnu (64-bit)
Running under: Pop!_OS 18.10

Matrix products: default
BLAS/LAPACK: /opt/intel/compilers_and_libraries_2019.1.144/linux/mkl/lib/intel64_lin/libmkl_gf_lp64.so

locale:
 [1] LC_CTYPE=en_US.UTF-8      LC_NUMERIC=C               LC_TIME=en_US.UTF-8
 [4] LC_COLLATE=en_US.UTF-8    LC_MONETARY=en_US.UTF-8    LC_MESSAGES=en_US.UTF-8
 [7] LC_PAPER=en_US.UTF-8      LC_NAME=C                  LC_ADDRESS=C
[10] LC_TELEPHONE=C            LC_MEASUREMENT=en_US.UTF-8 LC_IDENTIFICATION=C

attached base packages:
[1] compiler stats      graphics grDevices utils      datasets methods    base

other attached packages:
[1] showtext_0.5-1 showtextdb_2.0 sysfonts_0.8  gridExtra_2.3  ggplot2_3.1.0

loaded via a namespace (and not attached):
 [1] Rcpp_1.0.0      crayon_1.3.4    withr_2.1.2     grid_3.5.1      plyr_1.8.4
 [6] gtable_0.2.0    scales_1.0.0    pillar_1.3.0    rlang_0.3.0.1    lazyeval_0.2.1
[11] tools_3.5.1     munsell_0.5.0   colorspace_1.3-2 tibble_1.4.2
```

In this document I check and save raw data from the new AI tolerance experiment. The data files were first modified by replacing commas with tabs, fixing line endings, and inserting NA where data point were left blank. I also changed all instances of 196 sample ID to 196\_RDP and added NA where a field was blank. I also had to fix some of the HDRA IDs and remove underscores at ends of some accession RPD2 IDs. I begin by reading the data.

## 1 Phenotype data

```
> ctrl <- read.table("longest+total_control.tsv", header = T, sep = "\t")
> summary(ctrl)
```

|          | ID    | RDP2_names  | HDRA           | Total.Selected.Root.Length |
|----------|-------|-------------|----------------|----------------------------|
| Min.     | : 1.0 | 118_RDP: 16 | 5c60aacf.0: 16 | Min. : 6.75                |
| 1st Qu.: | 253.8 | 169_RDP: 16 | 7c86efa6.0: 16 | 1st Qu.:15.97              |

```

Median : 506.5   171_RDP: 16   edc86429.0: 16   Median :18.80
Mean   : 506.5   150_RDP: 14   f3d9c979.0: 16   Mean   :19.27
3rd Qu.: 759.2   019_RDP: 8    a51b2a39.0: 14   3rd Qu.:22.59
Max.    :1012.0   07      : 8    (Other)    :910   Max.    :36.47
                (Other):934   NA's       : 24   NA's     :38

Total.Root.Length
Min.    : 25.37
1st Qu.: 95.70
Median  :122.73
Mean    :123.14
3rd Qu.:149.75
Max.    :265.13
NA's    :36

```

```
> dim(ctrl)
```

```
[1] 1012    5
```

```
> expt <- read.table("longest+total_treatment.tsv", header = T, sep = "\t")
> summary(expt)
```

```

      ID      RDP2_names      HDRA      Total.Selected.Root.Length
Min.   :    1   118_RDP: 16   5c60aacf.0: 16   Min.    : 6.31
1st Qu.: 254   150_RDP: 16   a51b2a39.0: 16   1st Qu.:13.39
Median : 507   169_RDP: 16   edc86429.0: 16   Median :16.15
Mean    : 507   171_RDP: 14   f3d9c979.0: 16   Mean    :16.56
3rd Qu.: 760   019_RDP: 8    7c86efa6.0: 14   3rd Qu.:19.08
Max.    :1013   07      : 8    (Other)    :911   Max.    :30.89
                (Other):935   NA's       : 24   NA's     :36

Total.Root.Length
Min.    : 26.23
1st Qu.: 80.15
Median  :101.86
Mean    :105.12
3rd Qu.:127.86
Max.    :218.88
NA's    :35

```

```
> dim(expt)
```

```
[1] 1013    5
```

I eliminate rows where both traits are missing, or that correspond to ungenotyped accessions.

```

> ctrl <- subset(ctrl, !is.na(HDRA))
> ctrl <- subset(ctrl,
+   (!is.na(Total.Selected.Root.Length)) & (!is.na(Total.Root.Length)))
> summary(ctrl)

```

| ID             | RDP2_names  | HDRA           | Total.Selected.Root.Length |
|----------------|-------------|----------------|----------------------------|
| Min. : 9.0     | 169_RDP: 16 | 5c60aacf.0: 16 | Min. : 6.75                |
| 1st Qu.: 265.5 | 171_RDP: 16 | 7c86efa6.0: 16 | 1st Qu.:15.95              |
| Median : 517.0 | 118_RDP: 14 | f3d9c979.0: 15 | Median :18.75              |
| Mean : 513.8   | 150_RDP: 10 | edc86429.0: 14 | Mean :19.25                |
| 3rd Qu.: 763.5 | 019_RDP: 8  | a51b2a39.0: 10 | 3rd Qu.:22.47              |
| Max. :1012.0   | 07 : 8      | 128dd425.0: 9  | Max. :36.47                |
|                | (Other):879 | (Other) :871   |                            |

Total.Root.Length

|                |
|----------------|
| Min. : 33.61   |
| 1st Qu.: 96.27 |
| Median :122.92 |
| Mean :123.67   |
| 3rd Qu.:150.21 |
| Max. :265.13   |

```
> dim(ctrl)
```

```
[1] 951 5
```

```
> expt <- subset(expt, !is.na(HDRA))
> expt <- subset(expt,
+ (!is.na(Total.Selected.Root.Length)) & (!is.na(Total.Root.Length)))
> summary(expt)
```

| ID             | RDP2_names  | HDRA           | Total.Selected.Root.Length |
|----------------|-------------|----------------|----------------------------|
| Min. : 1.0     | 118_RDP: 16 | 5c60aacf.0: 16 | Min. : 6.31                |
| 1st Qu.: 263.5 | 150_RDP: 16 | a51b2a39.0: 16 | 1st Qu.:13.30              |
| Median : 513.5 | 169_RDP: 16 | edc86429.0: 16 | Median :16.11              |
| Mean : 512.7   | 171_RDP: 14 | 7c86efa6.0: 14 | Mean :16.52                |
| 3rd Qu.: 762.8 | 019_RDP: 8  | f3d9c979.0: 14 | 3rd Qu.:18.98              |
| Max. :1013.0   | 071_RDP: 8  | 02275e26.0: 8  | Max. :30.89                |
|                | (Other):876 | (Other) :870   |                            |

Total.Root.Length

|                |
|----------------|
| Min. : 26.23   |
| 1st Qu.: 80.38 |
| Median :102.51 |
| Mean :105.45   |
| 3rd Qu.:128.43 |
| Max. :218.88   |

```
> dim(expt)
```

```
[1] 954 5
```

No more missing data, so the modeling will not involve imputation. To plot the distributions, I first put everything in a single data frame.

```
> alTol <- data.frame(value=c(unlist(ctrl[,4:5]), unlist(expt[,4:5])),
+                       RDP2.ID=c(rep(as.character(ctrl[,2]), 2), rep(as.character(expt[,2]), 2)),
+                       HDRA.ID=c(rep(as.character(ctrl[,3]), 2), rep(as.character(expt[,3]), 2)),
+                       trait=c(rep(c("Selected.Root.Length", "Total.Root.Length"), each=nrow(ctrl)),
+                               rep(c("Selected.Root.Length", "Total.Root.Length"), each=nrow(expt))),
+                       treatment=rep(c("control", "treatment"), times = c(2*nrow(ctrl), 2*nrow(expt)))
+ )
```

Plot histograms of the two traits.

```
> showtext_auto()
> ggplot(data=alTol,
+       aes(x=value, ..density.., fill=treatment)) +
+   geom_histogram(bins=100) +
+   facet_wrap(~trait, scale="free") +
+   theme_classic(base_size=18, base_family="myriad")
```

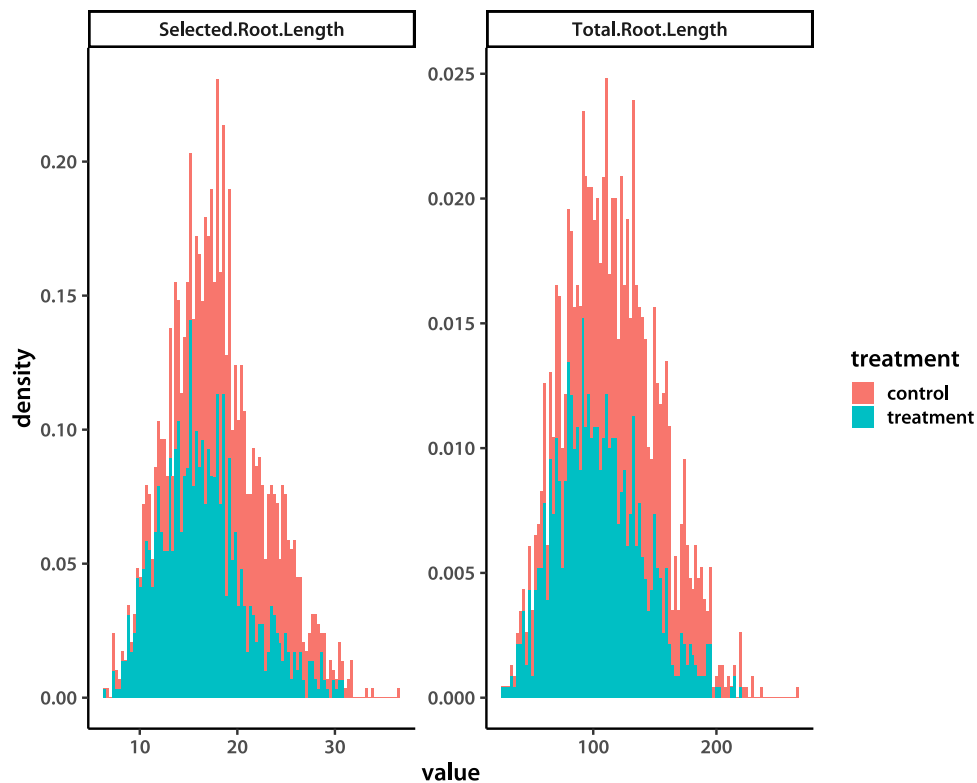

Save the raw data to a file.

```
> write.table(alTol, file="karavolias_RAW_TRJ.tsv", sep = "\t", quote=F, row.names=F)
```

I also look at total between-trait correlations.

```
> signif(cor(ctrl[,4:5])[1,2], 4)
```

```
[1] 0.5288
```

```
> signif(cor(expt[,4:5])[1,2], 4)
```

```
[1] 0.5486
```

Correlations are moderate, so will be good for multi-trait treatment.

I proceed to save the phenotypic data and the single factors that will relate the accessions to individual replicates. The model will be simple, with no experiment-level covariates. I first test if the control and experiment data frames have the same accessions, and if their order is the same.

```
> dim(unique(cbind(levels(ctrl$HDRA), levels(expt$HDRA)), MARGIN = 2))
```

```
[1] 119  1
```

It is. Proceed to make the factors and save.

```
> accID <- levels(ctrl$HDRA)
> ctrlFac <- as.integer(ctrl$HDRA)
> exptFac <- as.integer(expt$HDRA)
> trash <- .C("GSLvecSaveInt", "modelData/ctrlAcc.gbin", ctrlFac, length(ctrlFac))
> trash <- .C("GSLvecSaveInt", "modelData/exptAcc.gbin", exptFac, length(exptFac))
> cat(accID, "\n", file = "accList.tsv", sep = "\t")
```

Now save the phenotype data matrices.

```
> ctrlDat <- as.matrix(ctrl[,4:5])
> trash <- .C("GSLmatSave", "modelData/ctrlData.gbin",
+           as.double(ctrlDat), nrow(ctrlDat), ncol(ctrlDat))
> exptDat <- as.matrix(expt[,4:5])
> trash <- .C("GSLmatSave", "modelData/exptData.gbin",
+           as.double(exptDat), nrow(exptDat), ncol(exptDat))
```

List all relevant dimensions for future reference.

```
> dim(ctrlDat)
```

```
[1] 951  2
```

```
> dim(exptDat)
```

```
[1] 954  2
```

```
> nlevels(ctrl$HDRA)
```

```
[1] 119
```

## 2 Genotype data

Now I move to extracting genotype data to construct a relationship matrices. First, format the HDRA IDs to be usable by `plink`.

```
> cat(apply(cbind(accID, accID), 1, paste, collapse = "\t"),
+      file = "accPlink.tsv", sep = "\n")
```

Run `plink` to extract the accessions.

```
> plinkComm <- paste(
+   "plink1.9 --silent",
+   "--bfile ../../SNPdata/HDRA-G6-4-RDP1-RDP2-sativa-only",
+   "--keep accPlink.tsv --mac 2 --geno 0.3",
+   "--make-bed --out AlTolGeno"
+ )
> system(plinkComm)
```

Now make the IBS and IBD matrices with `plink`.

```
> system("plink1.9 --silent --bfile AlTolGeno --distance square ibs --out AlTolGeno")
> system("plink1.9 --silent --bfile AlTolGeno --make-rel square ibc2 --out AlTolGeno")
```

I read the relationship matrices and calculate eigenvectors and  $\lambda$ -values. `plink` does not automatically order individuals according to the list I provide in the `accPlink.tsv` file. I therefore have to re-order the rows and columns of the  $K$  matrices.

```
> K      <- matrix(scan(file = "AlTolGeno.mibs", what = double()), ncol = length(accID))
> Knam   <- matrix(scan(file="AlTolGeno.fam", what=character()), ncol=6, byrow=T)[,1]
> rownames(K) <- Knam
> colnames(K) <- Knam
> K      <- K[accID, accID]
> Keig   <- eigen(K)
> signif(Keig$values, 4)
```

|       |           |         |         |         |         |         |         |         |
|-------|-----------|---------|---------|---------|---------|---------|---------|---------|
| [1]   | 104.30000 | 1.38400 | 1.13800 | 0.58800 | 0.46620 | 0.44920 | 0.40810 | 0.35210 |
| [9]   | 0.29120   | 0.27210 | 0.25680 | 0.24580 | 0.22260 | 0.21950 | 0.20440 | 0.19990 |
| [17]  | 0.19300   | 0.18810 | 0.17900 | 0.17590 | 0.17010 | 0.16220 | 0.15960 | 0.15900 |
| [25]  | 0.15290   | 0.14910 | 0.14680 | 0.13810 | 0.13630 | 0.13490 | 0.12940 | 0.12870 |
| [33]  | 0.12570   | 0.12300 | 0.12200 | 0.11790 | 0.11690 | 0.11450 | 0.11120 | 0.10990 |
| [41]  | 0.10810   | 0.10490 | 0.10460 | 0.10350 | 0.10140 | 0.10040 | 0.09955 | 0.09677 |
| [49]  | 0.09531   | 0.09442 | 0.09262 | 0.09149 | 0.08965 | 0.08730 | 0.08548 | 0.08447 |
| [57]  | 0.08332   | 0.08123 | 0.07966 | 0.07878 | 0.07720 | 0.07586 | 0.07501 | 0.07229 |
| [65]  | 0.07187   | 0.07091 | 0.06826 | 0.06574 | 0.06544 | 0.06421 | 0.06324 | 0.06188 |
| [73]  | 0.06054   | 0.06006 | 0.05902 | 0.05886 | 0.05654 | 0.05567 | 0.05507 | 0.05397 |
| [81]  | 0.05278   | 0.05202 | 0.05025 | 0.05001 | 0.04911 | 0.04760 | 0.04630 | 0.04568 |
| [89]  | 0.04460   | 0.04330 | 0.04261 | 0.04207 | 0.04095 | 0.03975 | 0.03853 | 0.03823 |
| [97]  | 0.03801   | 0.03586 | 0.03568 | 0.03484 | 0.03337 | 0.03292 | 0.03254 | 0.03168 |
| [105] | 0.03125   | 0.03050 | 0.02986 | 0.02956 | 0.02782 | 0.02641 | 0.02579 | 0.02366 |
| [113] | 0.02230   | 0.02182 | 0.02018 | 0.01980 | 0.01926 | 0.01677 | 0.01597 |         |

```

> eVal <- Keig$val[Keig$val > 1e-8]
> eVec <- Keig$vec[,Keig$val > 1e-8]
> trash <- .C("GSLvecSave", "modelData/IBSevl.gbin", as.double(eVal), length(eVal))
> trash <- .C("GSLmatSave", "modelData/IBSevc.gbin",
+   as.double(eVec), nrow(eVec), ncol(eVec))
> dim(eVec)

[1] 119 119

> K <- matrix(scan(file = "AlTolGeno.rel", what = double()), ncol = length(accID))
> rownames(K) <- Knam
> colnames(K) <- Knam
> K <- K[accID, accID]
> Keig <- eigen(K)
> signif(Keig$values, 4)

[1] 18.9200  7.4740  4.8950  4.4090  4.0020  3.7860  3.3590  3.0860  2.9980  2.9060
[11]  2.7610  2.6360  2.5520  2.4190  2.3620  2.3410  2.2910  2.2460  2.1880  2.1540
[21]  2.1390  2.1110  2.0940  2.0710  2.0400  1.9950  1.9750  1.9640  1.9470  1.9350
[31]  1.9040  1.9040  1.8980  1.8690  1.8670  1.8510  1.8470  1.8360  1.8340  1.8220
[41]  1.8100  1.7990  1.7930  1.7800  1.7770  1.7710  1.7610  1.7530  1.7490  1.7360
[51]  1.7350  1.7330  1.7180  1.7110  1.7090  1.7030  1.6970  1.6930  1.6810  1.6790
[61]  1.6760  1.6700  1.6670  1.6610  1.6540  1.6520  1.6450  1.6350  1.6260  1.6250
[71]  1.6200  1.6070  1.6030  1.5940  1.5890  1.5810  1.5740  1.5660  1.5630  1.5600
[81]  1.5570  1.5410  1.5350  1.5210  1.5180  1.5070  1.4960  1.4870  1.4760  1.4680
[91]  1.4580  1.4480  1.4340  1.4170  1.4100  1.4050  1.3980  1.3650  1.3500  1.3340
[101] 1.3090  1.2900  1.2590  1.2470  1.1960  1.1740  1.1570  1.1240  1.0530  1.0230
[111] 0.9863  0.9260  0.8120  0.7447  0.6761 -0.5490 -2.7760 -3.3190 -3.9550

```

```

> eVal <- Keig$val[Keig$val > 1e-8]
> eVec <- Keig$vec[,Keig$val > 1e-8]
> trash <- .C("GSLvecSave", "modelData/IBDev1.gbin", as.double(eVal), length(eVal))
> trash <- .C("GSLmatSave", "modelData/IBDevc.gbin",
+   as.double(eVec), nrow(eVec), ncol(eVec))
> dim(eVec)

[1] 119 115

```

I also save the eigenvectors and -values of the square of the IBS matrix in an attempt to capture non-additive relationships.

```

> K <- matrix(scan(file = "AlTolGeno.mibs", what = double()), ncol = length(accID))
> rownames(K) <- Knam
> colnames(K) <- Knam
> K <- K[accID, accID]
> K <- K*K
> Keig <- eigen(K)
> signif(Keig$values, 4)

```

|       |          |         |         |         |         |         |         |         |         |
|-------|----------|---------|---------|---------|---------|---------|---------|---------|---------|
| [1]   | 92.15000 | 2.28200 | 1.74500 | 1.05800 | 0.81790 | 0.81160 | 0.74480 | 0.59810 | 0.52960 |
| [10]  | 0.49760  | 0.46880 | 0.44570 | 0.41170 | 0.40250 | 0.37910 | 0.36580 | 0.35490 | 0.34810 |
| [19]  | 0.33210  | 0.32580 | 0.31600 | 0.30320 | 0.30010 | 0.29640 | 0.28630 | 0.27870 | 0.27750 |
| [28]  | 0.25970  | 0.25600 | 0.25340 | 0.24390 | 0.24290 | 0.23790 | 0.23340 | 0.23120 | 0.22360 |
| [37]  | 0.22230  | 0.21780 | 0.21230 | 0.20950 | 0.20720 | 0.20100 | 0.19970 | 0.19800 | 0.19400 |
| [46]  | 0.19350  | 0.19180 | 0.18540 | 0.18330 | 0.18200 | 0.17860 | 0.17630 | 0.17270 | 0.16840 |
| [55]  | 0.16570  | 0.16390 | 0.16090 | 0.15800 | 0.15410 | 0.15340 | 0.15030 | 0.14790 | 0.14600 |
| [64]  | 0.14070  | 0.14000 | 0.13870 | 0.13340 | 0.12870 | 0.12840 | 0.12570 | 0.12440 | 0.12180 |
| [73]  | 0.11880  | 0.11840 | 0.11630 | 0.11560 | 0.11120 | 0.10960 | 0.10860 | 0.10670 | 0.10380 |
| [82]  | 0.10290  | 0.09961 | 0.09926 | 0.09737 | 0.09450 | 0.09197 | 0.09016 | 0.08847 | 0.08592 |
| [91]  | 0.08455  | 0.08367 | 0.08132 | 0.07908 | 0.07686 | 0.07651 | 0.07565 | 0.07174 | 0.07111 |
| [100] | 0.06966  | 0.06677 | 0.06561 | 0.06488 | 0.06326 | 0.06218 | 0.06082 | 0.05977 | 0.05920 |
| [109] | 0.05588  | 0.05278 | 0.05167 | 0.04749 | 0.04474 | 0.04400 | 0.04065 | 0.03985 | 0.03890 |
| [118] | 0.03376  | 0.03222 |         |         |         |         |         |         |         |

```
> eVal <- Keig$val[Keig$val > 1e-8]
> eVec <- Keig$vec[,Keig$val > 1e-8]
> trash <- .C("GSLvecSave", "modelData/IBSSevl.gbin", as.double(eVal), length(eVal))
> trash <- .C("GSLmatSave", "modelData/IBSSevc.gbin",
+   as.double(eVec), nrow(eVec), ncol(eVec))
> dim(eVec)
```

```
[1] 119 119
```
