# Supplementary material
Source: publisher figshare collection journal article supplement (https://gsajournals.figshare.com/articles/dataset/_/10321538)
Supplement: Supplementary file 8 [file 1]

# Preparing raw phenotype data for analysis

Tony Greenberg

December 21, 2018

```
R version 3.5.1 (2018-07-02)
Platform: x86_64-pc-linux-gnu (64-bit)
Running under: Pop!_OS 18.10

Matrix products: default
BLAS/LAPACK: /opt/intel/compilers_and_libraries_2019.1.144/linux/mkl/lib/intel64_lin/libmkl_gf_lp64.so

locale:
 [1] LC_CTYPE=en_US.UTF-8      LC_NUMERIC=C               LC_TIME=en_US.UTF-8
 [4] LC_COLLATE=en_US.UTF-8    LC_MONETARY=en_US.UTF-8    LC_MESSAGES=en_US.UTF-8
 [7] LC_PAPER=en_US.UTF-8      LC_NAME=C                  LC_ADDRESS=C
[10] LC_TELEPHONE=C            LC_MEASUREMENT=en_US.UTF-8 LC_IDENTIFICATION=C

attached base packages:
[1] compiler stats      graphics grDevices utils      datasets methods      base

other attached packages:
[1] showtext_0.5-1 showtextdb_2.0 sysfonts_0.8  gridExtra_2.3  ggplot2_3.1.0

loaded via a namespace (and not attached):
 [1] Rcpp_1.0.0      crayon_1.3.4    withr_2.1.2     grid_3.5.1      plyr_1.8.4
 [6] gtable_0.2.0    scales_1.0.0    pillar_1.3.0    rlang_0.3.0.1    lazyeval_0.2.1
[11] tools_3.5.1     munsell_0.5.0   colorspace_1.3-2 tibble_1.4.2
```

In this document I detail the preparation of raw phenotype data from the initial tests of AI tolerance. I start by reading the phenotype data file. These data were provided by Lyza. The original file was modified to fix formatting and remove the caiapo control lines.

```
> AlTolRaw <- read.table("AlTolFixed.dat", sep = "\t", header = T)
> summary(AlTolRaw)
```

| Line_label   | Genotype_ID   | Tub          | treatment  | rep          |
|--------------|---------------|--------------|------------|--------------|
| L85 : 180    | NSFTV85 : 180 | :1027        | OuM :5180  | Min. : 1.0   |
| L5 : 123     | NSFTV152: 100 | 8 : 364      | 160uM:5174 | 1st Qu.: 3.0 |
| L152 : 100   | NSFTV200: 100 | 6 : 361      |            | Median : 6.0 |
| L200 : 100   | NSFTV88 : 100 | 5 : 360      |            | Mean :10.4   |
| L88 : 100    | NSFTV128: 99  | 2 : 358      |            | 3rd Qu.: 9.0 |
| L128 : 99    | NSFTV174: 99  | 3 : 356      |            | Max. :96.0   |
| (Other):9652 | (Other) :9676 | (Other):7528 |            |              |

| Original_sample_ID | day_3_TRL        | Experiment        |
|--------------------|------------------|-------------------|
| 1_Tub1A_OuM_01:    | 1 Min. : 0.29    | 2010_panelA :1824 |
| 1_Tub1A_OuM_02:    | 1 1st Qu.: 30.41 | 2010_panelB :1688 |
| 1_Tub1A_OuM_03:    | 1 Median : 55.66 | 2015 :1575        |
| 1_Tub1A_OuM_04:    | 1 Mean : 62.41   | 2008_screen3:1116 |
| 1_Tub1A_OuM_05:    | 1 3rd Qu.: 88.26 | 2008_screen2:1054 |
| 1_Tub1A_OuM_06:    | 1 Max. :255.62   | 2008_screen4:1048 |
| (Other)            | :10348           | (Other) :2049     |

I next look for accessions that have been genotyped and retain only data for those. These accessions are in the first column of the HDRA meta-data file I read in the following segment.

```
> nsfFl <- pipe("cut -f1 HDRA-G6-4-RDP1-RDP2-sativa-only_listPop.txt")
> nsfInd <- scan(nsfFl, what = character())
> close(nsfFl)
> nrow(AlTolRaw)

[1] 10354

> AlTolRaw <- AlTolRaw[as.character(AlTolRaw$Geno) %in% nsfInd,]
> nrow(AlTolRaw)

[1] 9015

> AlTolRaw$repID <- factor(paste(AlTolRaw$Genotype_ID, AlTolRaw$Experiment,
+   AlTolRaw$rep, sep = "."))
> AlTolRaw$Genotype_ID <- factor(as.character(AlTolRaw$Genotype_ID))
```

The phenotype table lists the control and Al treated plants as a factor. I would like to transform this into a matrix with treatment and control as “traits.” The base function that does this takes advantage of the fact that the controls and treatments are listed continuously one after the other within each experiment. It also inserts NA as appropriate when the number of control and treatment plants is not equal.

```
> insertNA <- cmpfun(function(ind, v1, v2){
+   ln <- ind[3:4] - ind[1:2]
+   rbind( c(v1[ind[1]:ind[3]], rep(NA, times = max(ln) - ln[1])),
+     c(v2[ind[2]:ind[4]], rep(NA, times = max(ln) - ln[2])) )
+ })
```

Next I write the function that will transform the raw table into a matrix with the treatment levels as traits. As a by-product, I also generate the relevant factors.

```
> YmatAll <- NULL
> lineFacAll <- NULL
> exprFacAll <- NULL
> buildY <- cmpfun(function(lnNam){
```

```

+   trtExpTab <- table(
+     as.character(AlTolRaw$Experiment[as.character(AlTolRaw$Genotype_ID) == lnNam]),
+     as.character(AlTolRaw$treatment[as.character(AlTolRaw$Genotype_ID) == lnNam]))
+   expNam <- NULL
+
+   if (sum(dim(trtExpTab)) == 2){
+     cat("WARNING: either treatment or control for line ", lnNam,
+       " is completely absent\n")
+     return(NULL)
+   }
+   if (0 %in% c(trtExpTab)){
+     non0ind <- apply(trtExpTab, 1, function(vec){!( 0 %in% vec )})
+     rwN      <- apply(matrix(trtExpTab[non0ind,], ncol = 2), 1, max)
+
+     expNam <- rownames(trtExpTab)[non0ind]
+     exprFacAll <- c(exprFacAll, rep(rownames(trtExpTab)[non0ind], rwN))
+     lineFacAll <- c(lineFacAll, rep(lnNam, sum(rwN)))
+
+     trtExpTab <- matrix(trtExpTab[non0ind,], ncol = 2)
+     trtExpTab <- matrix(apply(trtExpTab, 2, cumsum), ncol = 2)
+
+   } else {
+     rwN <- apply(trtExpTab, 1, max)
+
+     expNam <- rownames(trtExpTab)
+     exprFacAll <- c(exprFacAll, rep(rownames(trtExpTab), rwN))
+     lineFacAll <- c(lineFacAll, rep(lnNam, sum(rwN)))
+
+     trtExpTab <- matrix(apply(trtExpTab, 2, cumsum), ncol = 2)
+   }
+
+   ctrl <- AlTolRaw$day_3_TRL[ (AlTolRaw$treatment == "0uM")
+     & (as.character(AlTolRaw$Genotype_ID) == lnNam)
+     & (as.character(AlTolRaw$Experiment) %in% expNam) ]
+   trt  <- AlTolRaw$day_3_TRL[ (AlTolRaw$treatment == "160uM")
+     & (as.character(AlTolRaw$Genotype_ID) == lnNam)
+     & (as.character(AlTolRaw$Experiment) %in% expNam) ]
+
+   if (nrow(trtExpTab) == 1){
+     YmatAll <- rbind( YmatAll,
+       cbind(c(ctrl, rep(NA, times = max(c(trtExpTab)) - c(trtExpTab)[1])),
+         c(trt, rep(NA, times = max(c(trtExpTab)) - c(trtExpTab)[2])))) )
+   } else {
+     indTab <- cbind( rbind(rep(1,2), trtExpTab[-nrow(trtExpTab),] + 1), trtExpTab )
+

```

```
+      YmatAll <- rbind( YmatAll,
+        matrix(unlist(apply(indTab, 1, insertNA, ctrl, trt)),
+          ncol = 2, byrow = T) )
+    }
+    return(NULL)
+ })
> trash <- sapply(levels(AlTolRaw$Genotype_ID), buildY)
```

WARNING: either treatment or control for line NSFTV250 is completely absent

There is a warning about accession NSFTV250. Check the original data table.

```
> AlTolRaw[AlTolRaw$Geno == "NSFTV250",]
```

|      | Line_label | Genotype_ID | Tub  | treatment | rep | Original_sample_ID | day_3_TRL | Experiment  |
|------|------------|-------------|------|-----------|-----|--------------------|-----------|-------------|
| 7522 | L250       | NSFTV250    | Tub7 | OuM       | 1   | 250_Tub7_OuM_01    | 120.48    | 2010_panelA |
| 7523 | L250       | NSFTV250    | Tub7 | OuM       | 2   | 250_Tub7_OuM_02    | 129.00    | 2010_panelA |
| 7524 | L250       | NSFTV250    | Tub7 | OuM       | 3   | 250_Tub7_OuM_03    | 121.48    | 2010_panelA |
| 7525 | L250       | NSFTV250    | Tub7 | OuM       | 4   | 250_Tub7_OuM_04    | 145.33    | 2010_panelA |
| 7526 | L250       | NSFTV250    | Tub7 | OuM       | 5   | 250_Tub7_OuM_05    | 136.86    | 2010_panelA |
| 7527 | L250       | NSFTV250    | Tub7 | OuM       | 6   | 250_Tub7_OuM_06    | 157.24    | 2010_panelA |
| 7528 | L250       | NSFTV250    | Tub7 | OuM       | 7   | 250_Tub7_OuM_07    | 148.15    | 2010_panelA |
| 7529 | L250       | NSFTV250    | Tub7 | OuM       | 8   | 250_Tub7_OuM_08    | 184.68    | 2010_panelA |
| 7530 | L250       | NSFTV250    | Tub7 | OuM       | 9   | 250_Tub7_OuM_09    | 89.66     | 2010_panelA |
| 7531 | L250       | NSFTV250    | Tub7 | OuM       | 10  | 250_Tub7_OuM_10    | 163.52    | 2010_panelA |

repID

```
7522 NSFTV250.2010_panelA.1
7523 NSFTV250.2010_panelA.2
7524 NSFTV250.2010_panelA.3
7525 NSFTV250.2010_panelA.4
7526 NSFTV250.2010_panelA.5
7527 NSFTV250.2010_panelA.6
7528 NSFTV250.2010_panelA.7
7529 NSFTV250.2010_panelA.8
7530 NSFTV250.2010_panelA.9
7531 NSFTV250.2010_panelA.10
```

Indeed, no treatment data.

In addition, manual examination revealed that the `tub9` and `tub10` in the `2010_panelB` are most likely switched. Since these account for few data points, I will eliminate these tubs. However, one accession (`NSFTV128`) has data from other experiments, so I keep that.

```
> badGeno <- unique(as.character(AlTolRaw[(AlTolRaw$Exper == "2010_panelB")
+   & (AlTolRaw$Tub %in% c("Tub10", "Tub9")),][,2]))
> badGeno <- badGeno[!(badGeno %in% AlTolRaw$Geno[AlTolRaw$Exper != "2010_panelB"])]
> badGeno <- c(badGeno, "NSFTV250")
> badGeno

[1] "NSFTV108" "NSFTV177" "NSFTV182" "NSFTV186" "NSFTV192" "NSFTV211" "NSFTV218"
[8] "NSFTV232" "NSFTV236" "NSFTV249" "NSFTV300" "NSFTV302" "NSFTV307" "NSFTV387"
[15] "NSFTV250"
```

I rebuild the phenotype matrix.

```
> buildY <- cmpfun(function(lnNam){
+   trtExpTab <- NULL
+   if(lnNam == "NSFTV128"){ # this line has bad and good experiments
+     trtExpTab <- table(
+       as.character(AlTolRaw$Experiment[(as.character(AlTolRaw$Genotype_ID) == lnNam)
+         & (as.character(AlTolRaw$Experiment) != "2010_panelB")]),
+       as.character(AlTolRaw$treatment[(as.character(AlTolRaw$Genotype_ID) == lnNam)
+         & (as.character(AlTolRaw$Experiment) != "2010_panelB")]))
+   }
+   else {
+     trtExpTab <- table(
+       as.character(AlTolRaw$Experiment[as.character(AlTolRaw$Genotype_ID) == lnNam]),
+       as.character(AlTolRaw$treatment[as.character(AlTolRaw$Genotype_ID) == lnNam]))
+   }
+   expNam <- NULL
+
+   if (sum(dim(trtExpTab)) == 2){
+     cat("WARNING: either treatment or control for line ", lnNam,
+       " is completely absent\n")
+     return(NULL)
+   }
+   if (0 %in% c(trtExpTab)){
+     non0ind <- apply(trtExpTab, 1, function(vec){!( 0 %in% vec )})
+     rwN      <- apply(matrix(trtExpTab[non0ind,], ncol = 2), 1, max)
+
+     expNam <- rownames(trtExpTab)[non0ind]
+     exprFacAll <- c(exprFacAll, rep(rownames(trtExpTab)[non0ind], rwN))
+     lineFacAll <- c(lineFacAll, rep(lnNam, sum(rwN)))
+
+     trtExpTab <- matrix(trtExpTab[non0ind,], ncol = 2)
+     trtExpTab <- matrix(apply(trtExpTab, 2, cumsum), ncol = 2)
+
+   } else {
+     rwN <- apply(trtExpTab, 1, max)
+
+     expNam <- rownames(trtExpTab)
+     exprFacAll <- c(exprFacAll, rep(rownames(trtExpTab), rwN))
+     lineFacAll <- c(lineFacAll, rep(lnNam, sum(rwN)))
+
+     trtExpTab <- matrix(apply(trtExpTab, 2, cumsum), ncol = 2)
+   }
+
+   ctrl <- AlTolRaw$day_3_TRL[ (AlTolRaw$treatment == "OuM")
+     & (as.character(AlTolRaw$Genotype_ID) == lnNam)
```

```

+      & (as.character(AlTolRaw$Experiment) %in% expNam) ]
+      trt  <- AlTolRaw$day_3_TRL[ (AlTolRaw$treatment == "160uM")
+      & (as.character(AlTolRaw$Genotype_ID) == lnNam)
+      & (as.character(AlTolRaw$Experiment) %in% expNam) ]
+
+      if (nrow(trtExpTab) == 1){
+        YmatAll <- rbind( YmatAll,
+          cbind(c(ctrl, rep(NA, times = max(c(trtExpTab)) - c(trtExpTab)[1])),
+            c(trt, rep(NA, times = max(c(trtExpTab)) - c(trtExpTab)[2]))) )
+      } else {
+        indTab  <- cbind( rbind(rep(1,2), trtExpTab[-nrow(trtExpTab),] + 1), trtExpTab )
+
+        YmatAll <- rbind( YmatAll,
+          matrix(unlist(apply(indTab, 1, insertNA, ctrl, trt)), ncol = 2, byrow = T) )
+      }
+      return(NULL)
+    })
> goodGeno <- levels(AlTolRaw$Genotype_ID)[!(levels(AlTolRaw$Genotype_ID) %in% badGeno)]
> YmatAll   <- NULL
> lineFacAll <- NULL
> exprFacAll <- NULL
> trash <- sapply(goodGeno, buildY)
> dim(YmatAll)

[1] 4428    2

> length(lineFacAll)

[1] 4428

> length(unique(lineFacAll))

[1] 361

```

Make the experiment factor levels a bit easier to fit on plots.

```
> exprFacAll <- sub("panel", "", sub("screen", "", exprFacAll))
```

I build a data frame with the phenotypic data, adding experiment, accession, and population information for plotting. I also create a version of the population index that is easier to see on plots.

```

> popInd <- matrix(scan(file="HDRA-G6-4-RDP1-RDP2-sativa-only_listPop.txt",
+                       what = character()), ncol=3, byrow=T)
> rownames(popInd) <- nsfInd
> popInd      <- popInd[lineFacAll,]

```

```
> displayPop <- popInd[,2]
> displayPop[grepl("admixed", popInd[,2])] <- "ADM"
> displayPop[popInd[,2] == "aus"] <- "AUS"
> displayPop[popInd[,2] == "indica"] <- "IND"
> displayPop[popInd[,2] == "aromatic"] <- "ARO"
> displayPop[popInd[,2] == "temperate-japonica"] <- "TEJ"
> displayPop[popInd[,2] == "tropical-japonica"] <- "TRJ"
> Yframe <- data.frame(TRSG = c(YmatAll),
+                       treatment = rep(c("Control", "Treated"), each=nrow(YmatAll)),
+                       experiment = rep(exprFacAll, 2),
+                       population = factor(rep(displayPop, 2),
+                                           levels=c("IND", "AUS", "ARO", "TRJ", "TEJ", "ADM")),
+                       NSFTV.ID = factor(rep(popInd[,1], 2)),
+                       HDRA.ID = factor(rep(popInd[,3], 2))
+                       )
> exprFacAll <- rep(exprFacAll, 2)[!is.na(Yframe$TRSG)]
> Yframe <- Yframe[!is.na(Yframe$TRSG),]
```

I plot overall histograms of the phenotype values.

```
> pdfFlNam <- "rawHist.pdf"
> showtext_auto()
> ggplot(data=Yframe, aes(x=TRSG, ..density.., fill=treatment)) +
+   geom_histogram(bins=200) +
+   theme_classic(base_size=18, base_family="myriad") +
+   xlab("total root system growth")
> ggsave(pdfFlNam, width=8, height=8, units="in", device="pdf", useDingbats=F)
> cat("\\includegraphics{" , pdfFlNam, "}" , sep="")
```

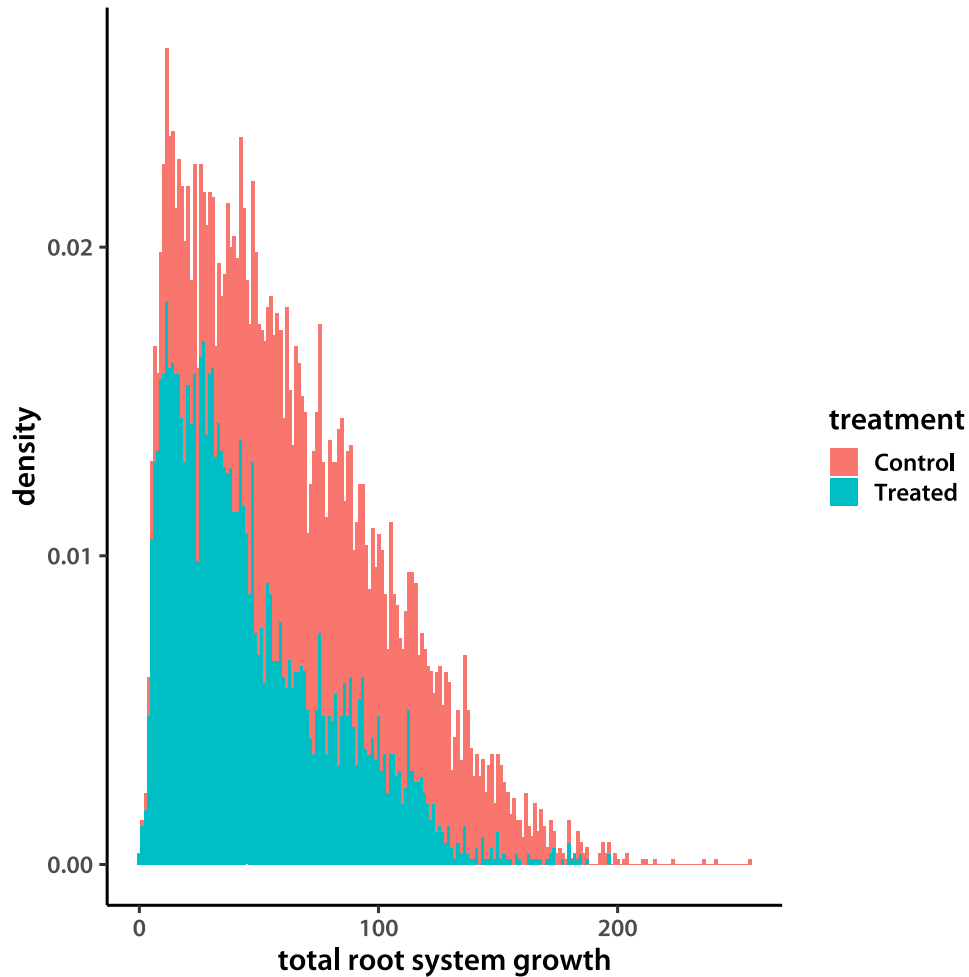

There are no outliers that suggest data entry errors. I next check the magnitude of the experiment effect, first creating a data frame to use for plotting.

```
> pdfFlNam <- "experimentVal.pdf"
> showtext_auto()
> ggplot(data=Yframe, aes(y=TRSG, x=experiment)) +
+   geom_boxplot(fill="grey80") +
+   theme_classic(base_size=18, base_family="myriad") +
+   facet_wrap(~treatment, scales="free_y", nrow=2) +
+   ylab("total root system growth") +
+   theme(axis.text.x=element_text(angle=-45))
> ggsave(pdfFlNam, width=8, height=10, units="in", device="pdf", useDingbats=F)
> cat("\\includegraphics{" , pdfFlNam, "}"\\n\\n", sep="")
```

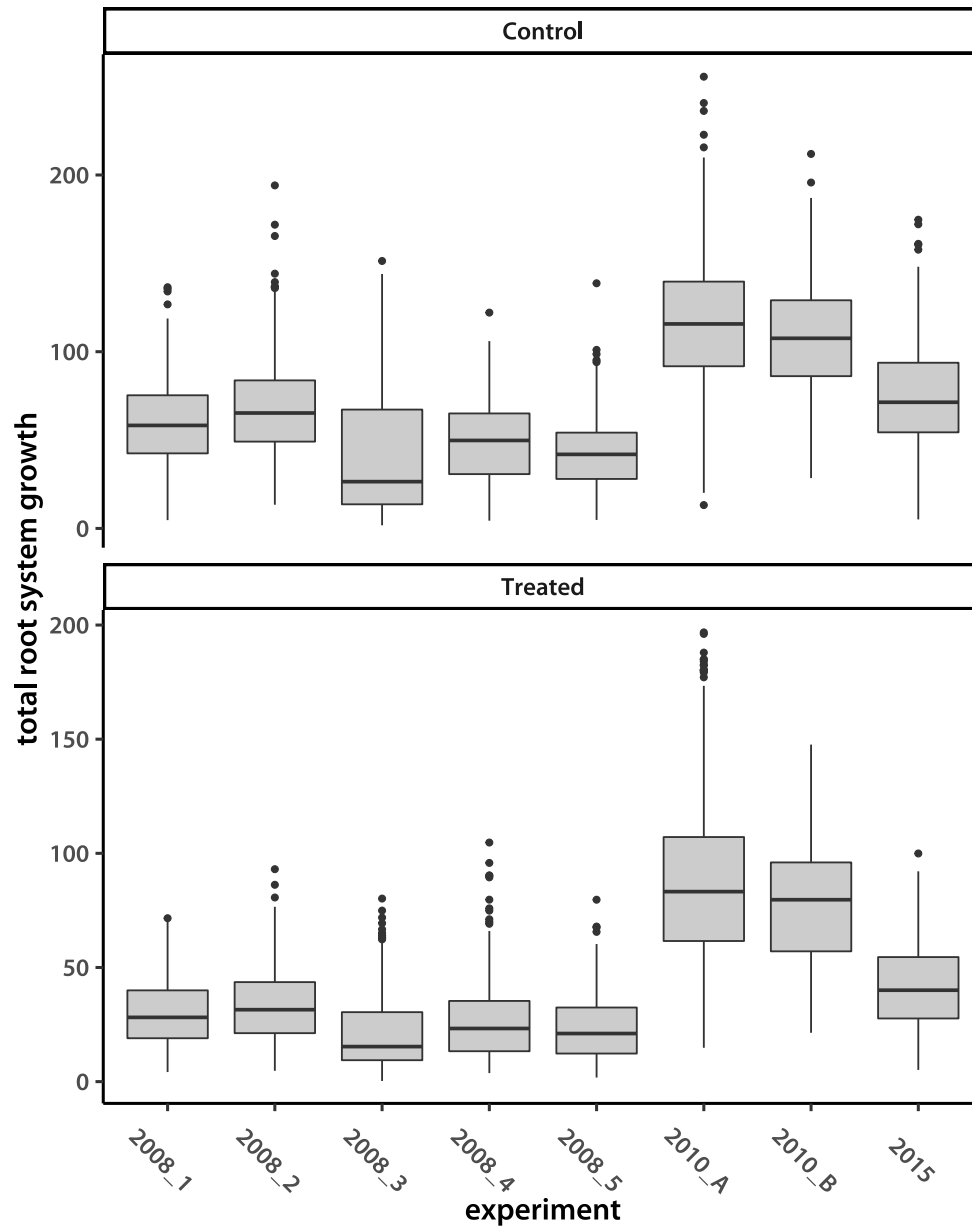

Now separate by population.

```
> pdfFlNam <- "experimentValPop.pdf"
> ggplot(data=Yframe, aes(y=TRSG, x=experiment, fill=population)) +
+   geom_boxplot() +
+   theme_classic(base_size=18, base_family="myriad") +
+   facet_wrap(~treatment, scales="free_y", nrow=2) +
+   ylab("total root system growth") +
+   theme(axis.text.x=element_text(angle=-45))
> showtext_auto()
```

```
> ggsave(pdfFlNam, width=8, height=10, units="in", device="pdf", useDingbats=F)
> cat("\\includegraphics{", pdfFlNam, "}\n\n", sep="")
```

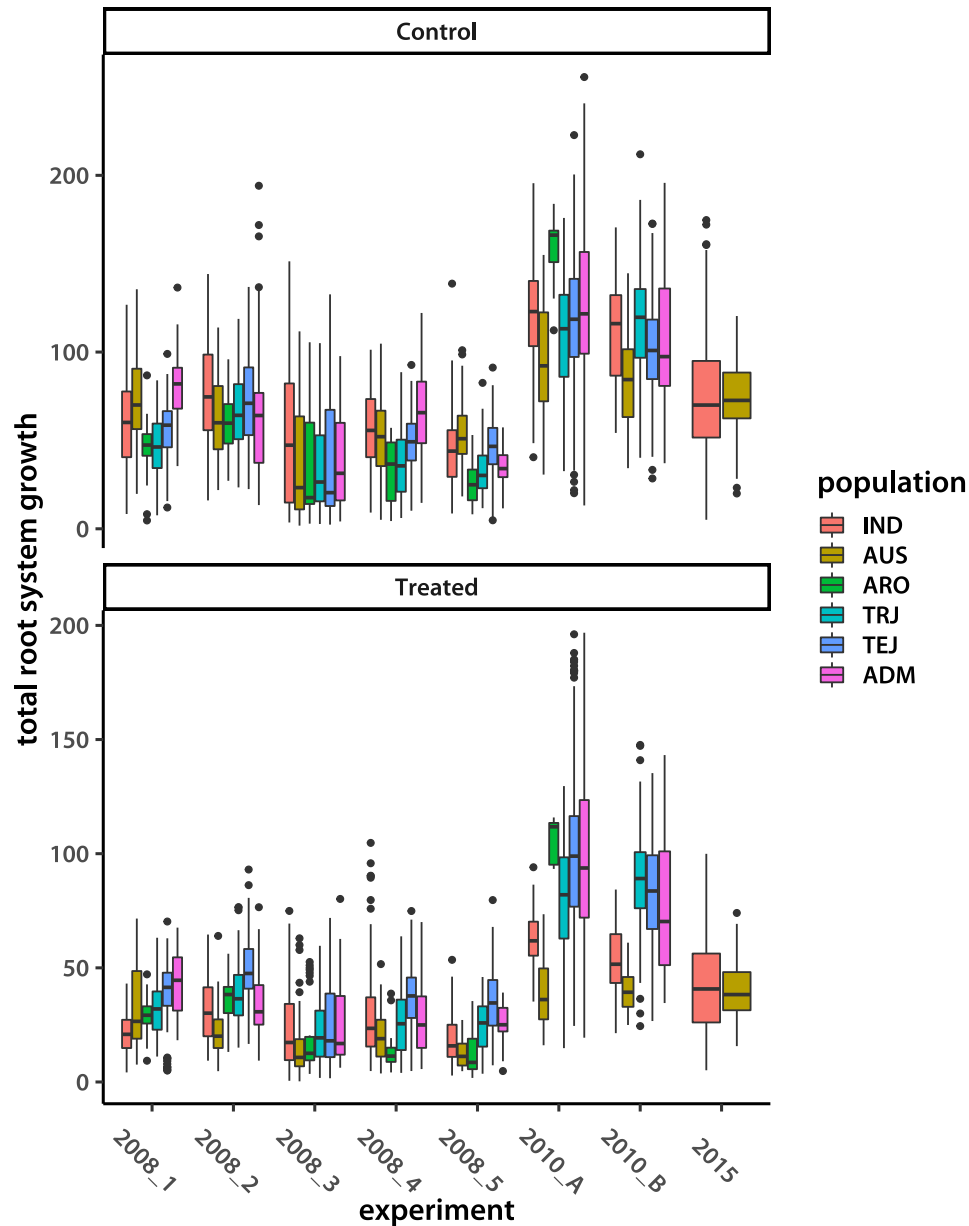

I also look at the number of samples by population in each experiment.

```
> pdfFlNam <- "experimentBar.pdf"
> ctVec <- tapply(1:nrow(Yframe), paste(Yframe$treatment,
+                                       Yframe$population,
+                                       Yframe$experiment, sep="."),
+               length)
```

```
> ctID <- matrix(unlist(strsplit(names(ctVec), "\\.")), ncol=3, byrow=T)
> ctFrame <- data.frame(count=ctVec,
+                        treatment=ctID[,1], population=ctID[,2], experiment=ctID[,3])
> showtext_auto()
> ggplot(data=ctFrame, aes(y=count, x=experiment, fill=population)) +
+   geom_bar(stat="identity") +
+   theme_classic(base_size=18, base_family="myriad") +
+   facet_wrap(~treatment, scales="free_y", nrow=2) +
+   theme(axis.text.x=element_text(angle=-45))
> ggsave(pdfFlNam, width=8, height=10, units="in", device="pdf", useDingbats=F)
> cat("\\\\includegraphics{" , pdfFlNam, "}\\n\\n", sep="")
```

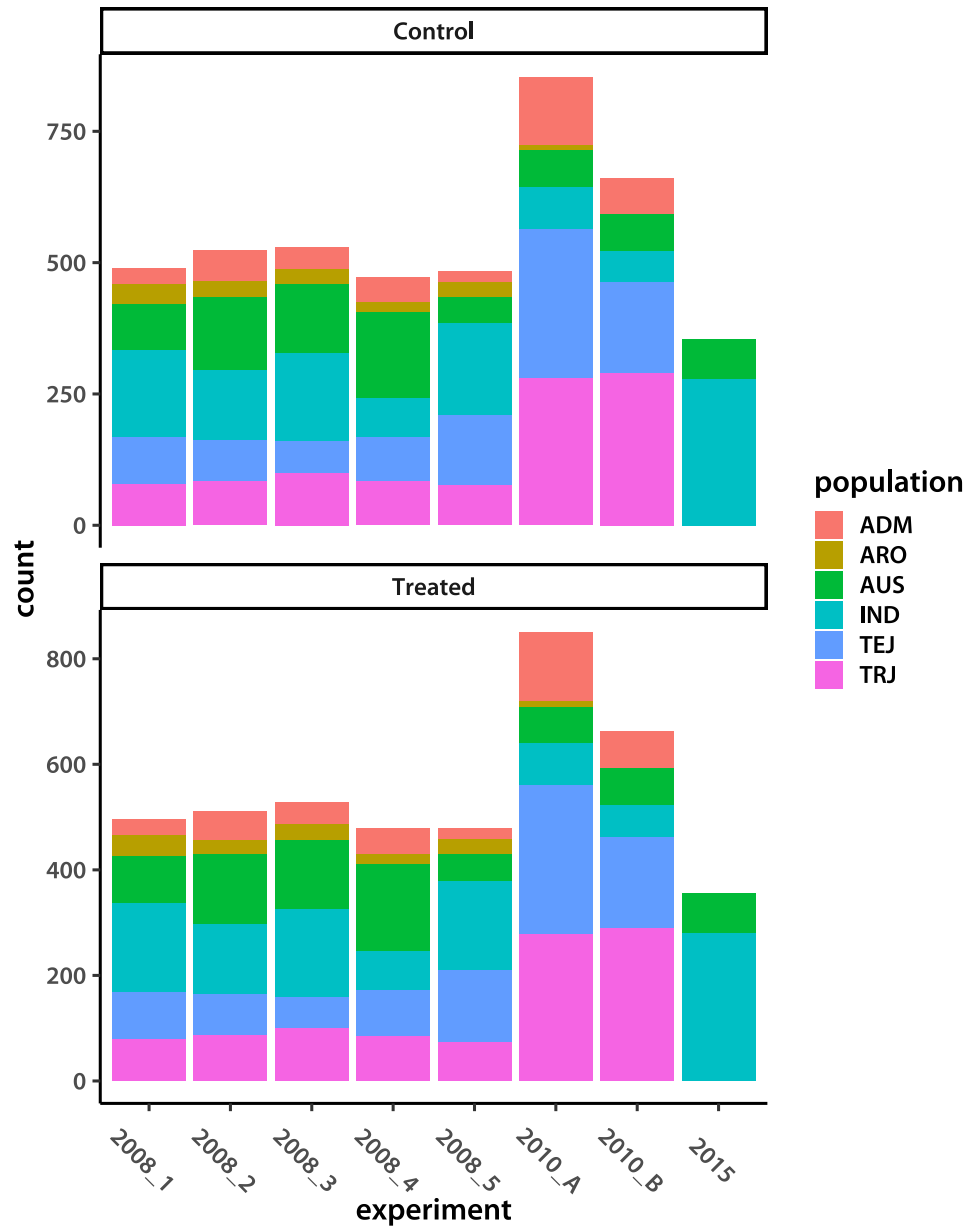

Population and experiment are somewhat confounded. In particular, 2015 is only *indica* and *aus*. Looking at the graph, it seems that distributions for these populations within experiment 2008\_2 are the closest to 2015. I rename 2008\_2 and 2015 as 2008\_15.

```
> exprFacAll[exprFacAll == "2015"] <- "2008_15"
> exprFacAll[exprFacAll == "2008_2"] <- "2008_15"
> Yframe$experiment <- factor(exprFacAll)
```

Re-plot to see the effect of this arrangement.

```
> pdfFlNam <- "experimentValPooled.pdf"
> showtext_auto()
```

```

> ggplot(data=Yframe, aes(y=TRSG, x=experiment)) +
+   geom_boxplot(fill="grey80") +
+   theme_classic(base_size=18, base_family="myriad") +
+   facet_wrap(~treatment, scales="free_y", nrow=2) +
+   ylab("total root system growth") +
+   theme(axis.text.x=element_text(angle=-45))
> ggsave(pdfFlNam, width=8, height=10, units="in", device="pdf", useDingbats=F)
> cat("\\\\includegraphics{", pdfFlNam, "}\n\n", sep="")

```

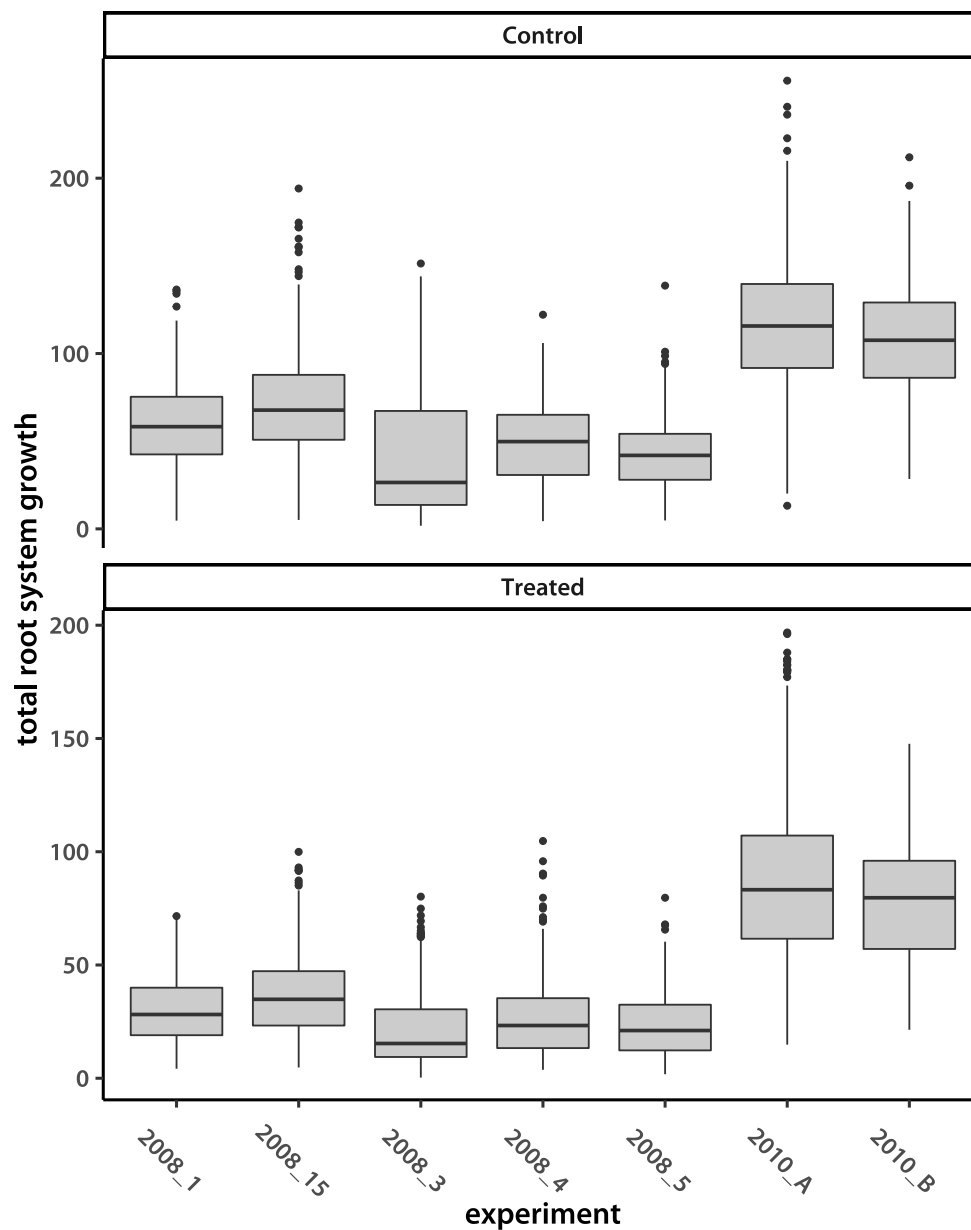

I save the raw data frame to a file.

```
> write.table(Yframe, file="famosoRAW.tsv", quote=F, sep="\t", row.names=F)
```

I prepare the data for output to files that will be used by the MuGen library-based code.

```
> matNAindALL <- apply(YmatAll, 2, function(vec){ifelse(is.na(vec), 1, 0)})
> signif(colSums(matNAindALL)/nrow(YmatAll),4)
```

```
[1] 0.01378 0.01513
```

```
> totNAindALL <- rowSums(matNAindALL)
> cat(unique(lineFacAll), file = "lineIDsAll.txt", sep = " ")
> blkIdx <- 1:2
```

I make a contrast matrix for the experiment factor. Since there are few levels, I will model with a vague prior (analogous to a fixed effect). The 2008\_1 level is the base, simply because it is the first on the list.

```
> expMatAll <- sapply(unique(exprFacAll)[-1], function(val){as.integer(exprFacAll==val)})
> dim(expMatAll)
```

```
[1] 8728    6
```

Next I split the data into populations. First, generate the indexes for regular populations.

```
> IAind <- popInd[,2] %in% c("admixed-indica", "aus", "indica")
> AUSind <- popInd[,2] == "aus"
> JAPind <- popInd[,2] %in%
+   c("admixed-japonica", "temperate-japonica", "tropical-japonica", "aromatic")
> TRJind <- popInd[,2] == "tropical-japonica"
> sum(IAind)
```

```
[1] 2009
```

```
> sum(AUSind)
```

```
[1] 794
```

```
> sum(JAPind)
```

```
[1] 2349
```

```
> sum(TRJind)
```

```
[1] 1007
```

Next, I extract tropical *japonica* accessions that also have a significant admixture from *indica* and *aus*.

```

> admxFram <- read.table(file="FastStructRes_K7_subpop_DW.csv", sep="\t", header=T)
> indSum <- rowSums(admxFram[,c("IND1", "IND2", "IND3", "AUS")])
> trjAdmNam <- as.character(admxFram$ID)[(admxFram$TRJ >= 0.3) & (indSum >= 0.1)
+      & (admxFram$TEJ <= 0.1) & (admxFram$ARO <= 0.1)]
> trjAdmNam <- trjAdmNam[grepl("\\.0$", trjAdmNam)]
> arrFl <- pipe("cut -f1,3 HDRA-G6-4-RDP1-RDP2-sativa-only_listPop.txt")
> arrInd <- matrix(scan(arrFl, what = character()), ncol=2, byrow=T)
> close(arrFl)
> rownames(arrInd) <- arrInd[,1]
> trjAdmNam[trjAdmNam %in% arrInd[unique(lineFacAll),2]]

[1] "818143d8.0" "b0816082.0" "f25ad349.0" "5c592759.0" "642238d9.0" "c7301040.0"

```

```

> admxFram[as.character(admxFram$ID) %in%
+   trjAdmNam[trjAdmNam %in% arrInd[unique(lineFacAll),2]],]

      ID      TEJ      TRJ IND1      IND2      AUS      ARO      IND3
209 818143d8.0 0.000000 0.881691 0 0.000000 0.118307 0.000000 0.000000
245 b0816082.0 0.012675 0.804436 0 0.182887 0.000000 0.000000 0.000000
362 f25ad349.0 0.074808 0.815979 0 0.000000 0.000000 0.000000 0.109211
729 5c592759.0 0.061996 0.419183 0 0.518820 0.000000 0.000000 0.000000
797 642238d9.0 0.000000 0.530285 0 0.096401 0.000000 0.000000 0.373312
846 c7301040.0 0.000000 0.459639 0 0.000000 0.099597 0.008283 0.432479

      subpop  subpop.new
209 tropical-japonica      trj
245 tropical-japonica      trj
362 tropical-japonica      trj
729          admixed admixed-jap
797          admixed admixed-jap
846          admixed admixed-jap

```

There are six accessions I can use. Too few to analyze by themselves, but I will add them to the TRJ group to make TRJA and test that.

```

> TRJAind <- TRJind
> trjaSubs <- trjAdmNam[trjAdmNam %in% arrInd[unique(lineFacAll),2]]
> TRJAind[names(TRJAind) %in% arrInd[arrInd[,2] %in% trjaSubs,1]] <- TRUE

```

Save the admixed accession names.

```

> cat(arrInd[arrInd[,2] %in% trjaSubs,1], file = "lineIDsADM.txt", sep = " ")

```

Make the subsets.

```

> YmatIA <- YmatAll[IAind,]
> matNAindIA <- matNAindALL[IAind,]
> colSums(matNAindIA)

```

```

[1] 32 36

```

```
> totNAindIA <- totNAindALL[IAind]
> lineFacIA <- factor(lineFacAll[IAind])
> expMatIA <- expMatAll[IAind,]
> colSums(expMatIA)

2010_B 2008_3 2008_5 2008_15 2008_4 2010_A
    549    492    397    865    436    770

> YmatAUS <- YmatAll[AUSind,]
> matNAindAUS <- matNAindALL[AUSind,]
> colSums(matNAindAUS)

[1] 12 14

> totNAindAUS <- totNAindALL[AUSind]
> lineFacAUS <- factor(lineFacAll[AUSind])
> expMatAUS <- expMatAll[AUSind,]
> colSums(expMatAUS)

2010_B 2008_3 2008_5 2008_15 2008_4 2010_A
    208    185     91    328    246    339

> YmatJAP <- YmatAll[JAPind,]
> matNAindJAP <- matNAindALL[JAPind,]
> colSums(matNAindJAP)

[1] 28 30

> totNAindJAP <- totNAindALL[JAPind]
> lineFacJAP <- factor(lineFacAll[JAPind])
> expMatJAP <- expMatAll[JAPind,]
> colSums(expMatJAP)

2010_B 2008_3 2008_5 2008_15 2008_4 2010_A
    736    554    547    872    504    895

> YmatTRJ <- YmatAll[TRJind,]
> matNAindTRJ <- matNAindALL[TRJind,]
> colSums(matNAindTRJ)

[1] 11 11
```

```

> totNAindTRJ <- totNAindALL[TRJind]
> lineFacTRJ  <- factor(lineFacAll[TRJind])
> expMatTRJ   <- expMatAll[TRJind,]
> colSums(expMatTRJ)

 2010_B  2008_3  2008_5 2008_15  2008_4  2010_A
    332    199    262    322    222    445

> YmatTRJA     <- YmatAll[TRJAind,]
> matNAindTRJA <- matNAindALL[TRJAind,]
> colSums(matNAindTRJA)

[1] 12 11

> totNAindTRJA <- totNAindALL[TRJAind]
> lineFacTRJA  <- factor(lineFacAll[TRJAind])
> expMatTRJA   <- expMatAll[TRJAind,]
> colSums(expMatTRJA)

```

```

 2010_B  2008_3  2008_5 2008_15  2008_4  2010_A
    344    199    273    328    222    472

```

```

>

```

Finally, I save all the data to binary files for modeling. I have to first replace NA values in the data matrix. The value is not important because it will be ignored by the software I write.

```

> trash <- .C("GSLvecSaveInt", "phenoData/trtBlk.gbin",
+   as.integer(blkIdx), length(blkIdx))
> YmatAll[is.na(YmatAll)] <- 0.01
> YmatIA[is.na(YmatIA)]   <- 0.01
> YmatAUS[is.na(YmatAUS)] <- 0.01
> YmatJAP[is.na(YmatJAP)] <- 0.01
> YmatTRJ[is.na(YmatTRJ)] <- 0.01
> YmatTRJA[is.na(YmatTRJA)] <- 0.01
> lineFacAll <- factor(lineFacAll)
> lineFacIA  <- factor(lineFacIA)
> lineFacAUS <- factor(lineFacAUS)
> lineFacJAP <- factor(lineFacJAP)
> lineFacTRJ <- factor(lineFacTRJ)
> lineFacTRJA <- factor(lineFacTRJA)
> trash <- .C("GSLmatSave", "phenoData/YatAll.gbin",
+   as.double(YmatAll), nrow(YmatAll), ncol(YmatAll))
> trash <- .C("GSLvecSaveInt", "phenoData/matNAindAll.gbin",
+   as.integer(t(matNAindALL)), as.integer(prod(dim(matNAindALL))))

```

```
> trash <- .C("GSLvecSaveInt", "phenoData/totNAindAll.gbin",
+   as.integer(totNAindALL), length(totNAindALL))
> trash <- .C("GSLvecSaveInt", "phenoData/lnIndAll.gbin",
+   as.integer(lineFacAll), length(lineFacAll))
> trash <- .C("GSLmatSave", "phenoData/expMatAll.gbin",
+   as.double(expMatAll), nrow(expMatAll), ncol(expMatAll))
> trash <- .C("GSLmatSave", "phenoData/YatIA.gbin",
+   as.double(YmatIA), nrow(YmatIA), ncol(YmatIA))
> trash <- .C("GSLvecSaveInt", "phenoData/matNAindIA.gbin",
+   as.integer(t(matNAindIA)), as.integer(prod(dim(matNAindIA))))
> trash <- .C("GSLvecSaveInt", "phenoData/totNAindIA.gbin",
+   as.integer(totNAindIA), length(totNAindIA))
> trash <- .C("GSLvecSaveInt", "phenoData/lnIndIA.gbin",
+   as.integer(lineFacIA), length(lineFacIA))
> trash <- .C("GSLmatSave", "phenoData/expMatIA.gbin",
+   as.double(expMatIA), nrow(expMatIA), ncol(expMatIA))
> trash <- .C("GSLmatSave", "phenoData/YatAUS.gbin",
+   as.double(YmatAUS), nrow(YmatAUS), ncol(YmatAUS))
> trash <- .C("GSLvecSaveInt", "phenoData/matNAindAUS.gbin",
+   as.integer(t(matNAindAUS)), as.integer(prod(dim(matNAindAUS))))
> trash <- .C("GSLvecSaveInt", "phenoData/totNAindAUS.gbin",
+   as.integer(totNAindAUS), length(totNAindAUS))
> trash <- .C("GSLvecSaveInt", "phenoData/lnIndAUS.gbin",
+   as.integer(lineFacAUS), length(lineFacAUS))
> trash <- .C("GSLmatSave", "phenoData/expMatAUS.gbin",
+   as.double(expMatAUS), nrow(expMatAUS), ncol(expMatAUS))
> trash <- .C("GSLmatSave", "phenoData/YatJAP.gbin",
+   as.double(YmatJAP), nrow(YmatJAP), ncol(YmatJAP))
> trash <- .C("GSLvecSaveInt", "phenoData/matNAindJAP.gbin",
+   as.integer(t(matNAindJAP)), as.integer(prod(dim(matNAindJAP))))
> trash <- .C("GSLvecSaveInt", "phenoData/totNAindJAP.gbin",
+   as.integer(totNAindJAP), length(totNAindJAP))
> trash <- .C("GSLvecSaveInt", "phenoData/lnIndJAP.gbin",
+   as.integer(lineFacJAP), length(lineFacJAP))
> trash <- .C("GSLmatSave", "phenoData/expMatJAP.gbin",
+   as.double(expMatJAP), nrow(expMatJAP), ncol(expMatJAP))
> trash <- .C("GSLmatSave", "phenoData/YatTRJ.gbin",
+   as.double(YmatTRJ), nrow(YmatTRJ), ncol(YmatTRJ))
> trash <- .C("GSLvecSaveInt", "phenoData/matNAindTRJ.gbin",
+   as.integer(t(matNAindTRJ)), as.integer(prod(dim(matNAindTRJ))))
> trash <- .C("GSLvecSaveInt", "phenoData/totNAindTRJ.gbin",
+   as.integer(totNAindTRJ), length(totNAindTRJ))
> trash <- .C("GSLvecSaveInt", "phenoData/lnIndTRJ.gbin",
+   as.integer(lineFacTRJ), length(lineFacTRJ))
> trash <- .C("GSLmatSave", "phenoData/expMatTRJ.gbin",
```

```
+      as.double(expMatTRJ), nrow(expMatTRJ), ncol(expMatTRJ))
> trash <- .C("GSLmatSave", "phenoData/YatTRJA.gbin",
+      as.double(YmatTRJA), nrow(YmatTRJA), ncol(YmatTRJA))
> trash <- .C("GSLvecSaveInt", "phenoData/matNAindTRJA.gbin",
+      as.integer(t(matNAindTRJA)), as.integer(prod(dim(matNAindTRJA))))
> trash <- .C("GSLvecSaveInt", "phenoData/totNAindTRJA.gbin",
+      as.integer(totNAindTRJA), length(totNAindTRJA))
> trash <- .C("GSLvecSaveInt", "phenoData/lnIndTRJA.gbin",
+      as.integer(lineFacTRJA), length(lineFacTRJA))
> trash <- .C("GSLmatSave", "phenoData/expMatTRJA.gbin",
+      as.double(expMatTRJA), nrow(expMatTRJA), ncol(expMatTRJA))
>
```

Finally, I save the accession IDs and print all dimensions for easy reference.

```
> cat(levels(lineFacIA), file = "lineIDsIA.txt", sep = " ")
> cat(levels(lineFacAUS), file = "lineIDsAUS.txt", sep = " ")
> cat(levels(lineFacJAP), file = "lineIDsJAP.txt", sep = " ")
> cat(levels(lineFacTRJ), file = "lineIDsTRJ.txt", sep = " ")
> cat(levels(lineFacTRJA), file = "lineIDsTRJA.txt", sep = " ")
> cat(unique(exprFacAll)[-1], file = "expIDs.txt", sep = " ")
> dim(YmatAll)
```

```
[1] 4428    2
```

```
> dim(YmatIA)
```

```
[1] 2009    2
```

```
> dim(YmatAUS)
```

```
[1] 794     2
```

```
> dim(YmatJAP)
```

```
[1] 2349    2
```

```
> dim(YmatTRJ)
```

```
[1] 1007    2
```

```
> dim(YmatTRJA)
```

```
[1] 1037    2
```

```
> dim(expMatAll)
```

```
[1] 8728    6
```

```
> dim(expMatIA)
```

```
[1] 3988    6
```

```
> dim(expMatAUS)
```

```
[1] 1568    6
```

```
> dim(expMatJAP)
```

```
[1] 4600    6
```

```
> dim(expMatTRJ)
```

```
[1] 1965    6
```

```
> dim(expMatTRJA)
```

```
[1] 2025    6
```

```
> nlevels(lineFacAll)
```

```
[1] 361
```

```
> nlevels(lineFacIA)
```

```
[1] 141
```

```
> nlevels(lineFacAUS)
```

```
[1] 55
```

```
> nlevels(lineFacJAP)
```

```
[1] 213
```

```
> nlevels(lineFacTRJ)
```

```
[1] 92
```

```
> nlevels(lineFacTRJA)
```

```
[1] 95
```
